# Supplementary material for: Synthesis and Characterization of Novel 2-Acyl-3-trifluoromethylquinoxaline 1,4-Dioxides as Potential Antimicrobial Agents
Source: MDPI journal article supplement (doi:10.3390/ph15020155), 2022-01-27
Supplement: s1 [file s1]

## Supplementary Materials

### Synthesis and characterization of novel 2-acyl-3-trifluoromethylquinoxaline 1,4-dioxides as potential antimicrobial agents

Galina I. Buravchenko<sup>1</sup>, Dmitry A. Maslov<sup>2</sup>, Md Shah Alam<sup>3,4,5,6</sup>, Natalia E. Grammatikova<sup>1</sup>, Svetlana G. Frolova<sup>2,7</sup>, Aleksey A. Vatlin<sup>2,8</sup>, Xirong Tian<sup>3,4,5,6</sup>, Ivan V. Ivanov<sup>1,9</sup>, Olga B. Bekker<sup>2</sup>, Maxim A. Kryakvin<sup>10</sup>, Olga A. Dontsova<sup>10,11,12</sup>, Valery N. Danilenko<sup>2</sup>, Tianyu Zhang<sup>3,4,5,6</sup>, Andrey E. Shchekotikhin<sup>1,\*</sup>

1 Gause Institute of New Antibiotics, 119021 Moscow, Russia; buravchenkogi@gmail.com (G.I.B.); ngrammatikova@yandex.ru (N.E.G.); ivanvi@yandex.ru (I.V.I.); shchekotikhin@mail.ru (AES)

2 Laboratory of Bacterial Genetics, Vavilov Institute of General Genetics, Russian Academy of Sciences, Moscow, 119333, Russia; maslov\_da@vigg.ru (D.A.M.); sveta.frolova.1997@bk.ru (S.G.F.); vatlin\_alexey123@mail.ru (A.A.V.); obbekker@mail.ru (O.B.B.); valerid@vigg.ru (V.N.D.)

3 State Key Laboratory of Respiratory Disease, Guangzhou Institutes of Biomedicine and Health, Chinese Academy of Sciences, Guangzhou 510530, China; alam@gibh.ac.cn (M.S.A.); tian\_xirong@gibh.ac.cn (X.T.); zhang\_tianyu@gibh.ac.cn (T.Z.)

4 China-New Zealand Joint Laboratory on Biomedicine and Health, Guangzhou 510530, China; alam@gibh.ac.cn (Md S.A.); tian\_xirong@gibh.ac.cn (X.T.); zhang\_tianyu@gibh.ac.cn (T.Z.)

5 Guangdong-Hong Kong-Macao Joint Laboratory of Respiratory Infectious Diseases, Guangzhou Institutes of Biomedicine and Health, Chinese Academy of Sciences, Guangzhou 510530, China; alam@gibh.ac.cn (Md S.A.); tian\_xirong@gibh.ac.cn (X.T.); zhang\_tianyu@gibh.ac.cn (T.Z.)

6 University of Chinese Academy of Sciences, Beijing 100049, China; alam@gibh.ac.cn (M.S.A.); tian\_xirong@gibh.ac.cn (X.T.); zhang\_tianyu@gibh.ac.cn (T.Z.)

7 Moscow Institute of Physics and Technology (State University), Dolgoprudny, 141701, Russia; sveta.frolova.1997@bk.ru (S.G.F.)

8 Peoples' Friendship University of Russia (RUDN University), Moscow, 117198, Russia; vatlin\_alexey123@mail.ru (A.A.V.)

9 Mendeleev University of Chemical Technology, 9 Miusskaya Square, Moscow 125190, Russia; ivanvi@yandex.ru (I.V.I.)

10 Chemistry Department, Faculty of Bioengineering and Bioinformatics, Lomonosov Moscow State University, Moscow, Russia; maxim.kryakvin@gmail.com (M.A.K.); olga.a.dontsova@gmail.com (O.A.D.)

11 Center of Life Sciences, Skolkovo Institute of Science and Technology, Skolkovo, 143028, Russia; olga.a.dontsova@gmail.com (O.A.D.)

12 Shemyakin-Ovchinnikov Institute of Bioorganic Chemistry, Moscow, Russia; olga.a.dontsova@gmail.com (O.A.D.)

\* Correspondence: shchekotikhin@gause-inst.ru (A.E.S.)

\* Corresponding authors.

Andrey E. Shchekotikhin: [shchekotikhin@mail.ru](mailto:shchekotikhin@mail.ru)

## Legends to Figures and Tables

|                                                                                                                        |            |
|------------------------------------------------------------------------------------------------------------------------|------------|
| <b>Figure S1-S56, Table S1.</b> $^1\text{H}$ and $^{13}\text{C}$ NMR spectra of the compounds <b>6-7a, 7d, 12-18</b> . | <b>S3</b>  |
| <b>Figure S57-S60.</b> Copies of 2D NMR Spectra of compounds <b>13b</b> and <b>13c</b> .                               | <b>S32</b> |
| <b>Figure S61-S87.</b> Copies of HRMS ESI spectra.                                                                     | <b>S36</b> |
| <b>Figure S88-112.</b> Copies of HPLC spectra.                                                                         | <b>S63</b> |
| <b>Figure S113.</b> Nucleotide sequence of <i>MSMEG_4883</i> .                                                         | <b>S88</b> |
| <b>Table S2.</b> Unique SNPs in quinoxaline-resistant <i>M. smegmatis</i> mutants                                      | <b>S89</b> |

## Copies of NMR Spectra

**Figure S1.** Copy of  $^1\text{H}$  NMR spectrum of the derivative **6a**.

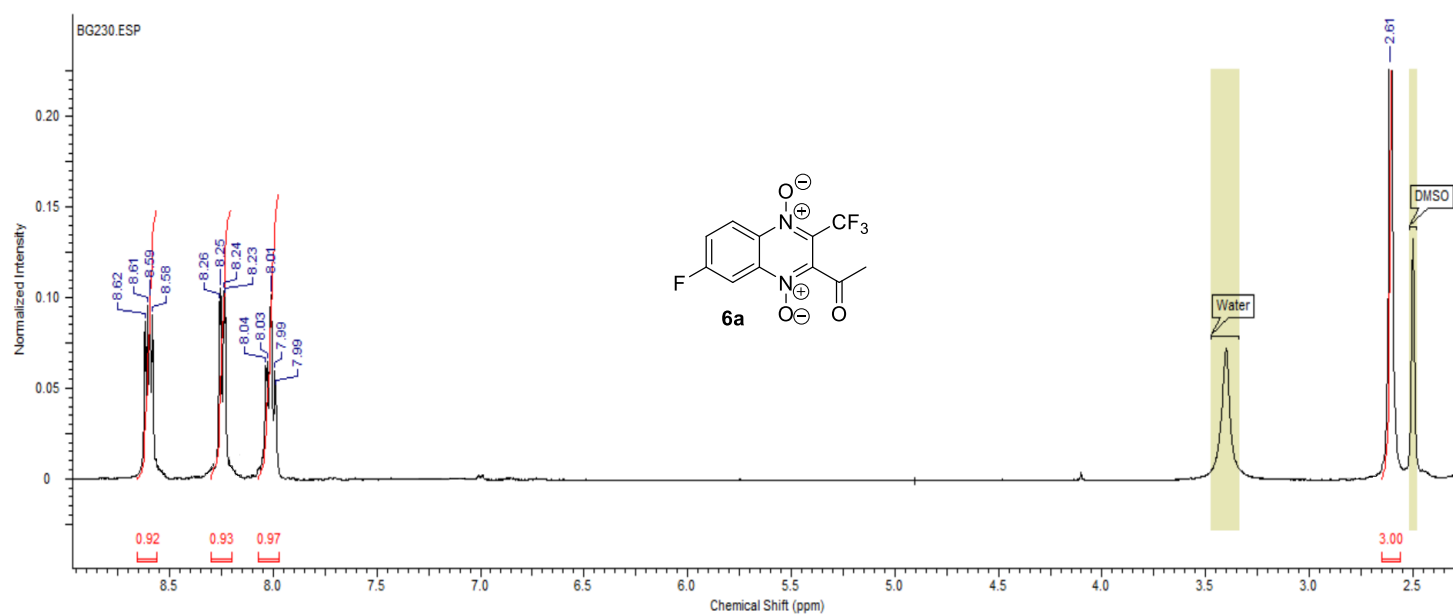

**Figure S2.** Copy of  $^{13}\text{C}$  NMR spectrum of the derivative **6a**.

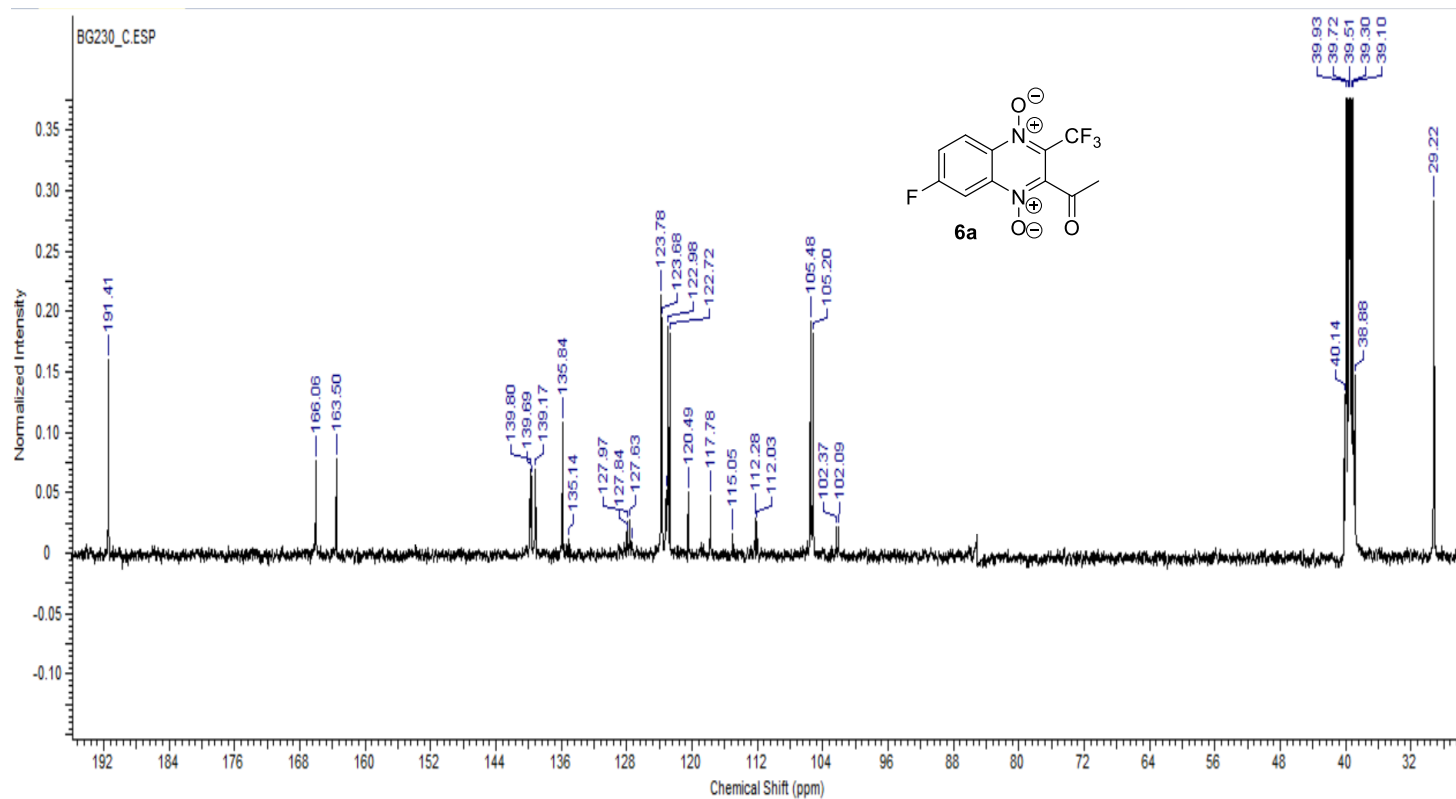

**Figure S3.** Copy of  $^1\text{H}$  NMR spectrum of the derivative **7a**.

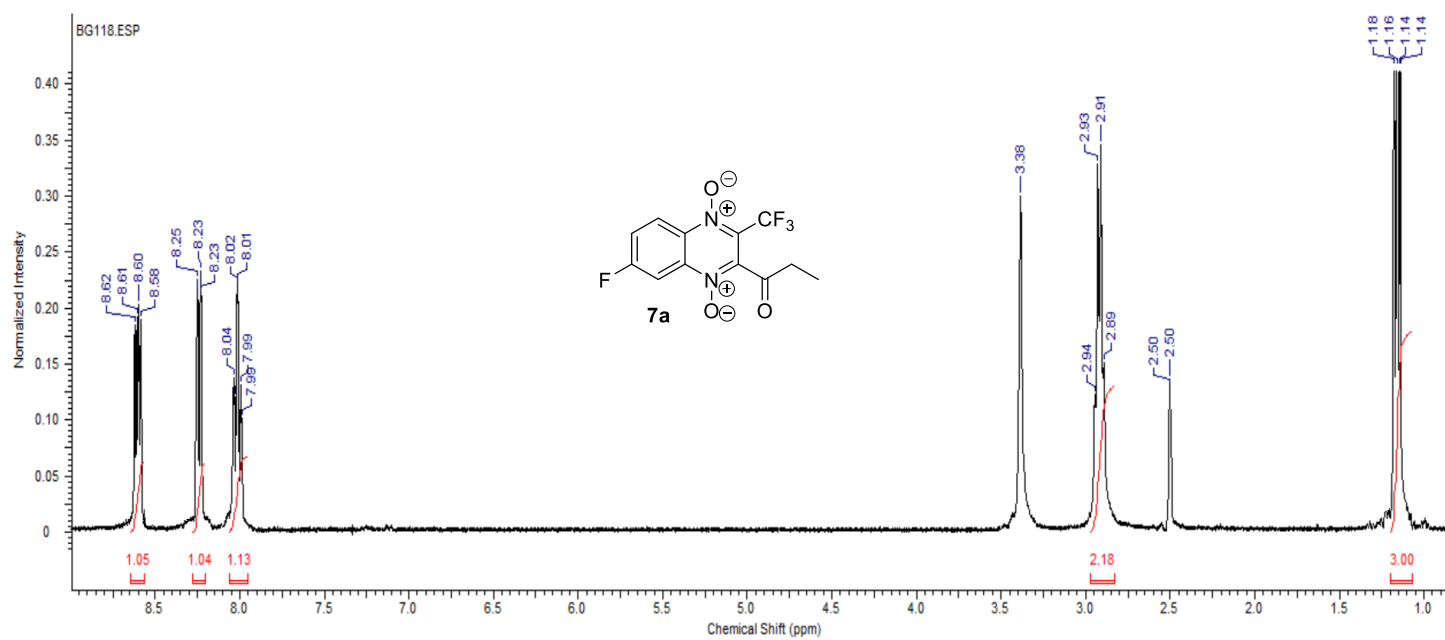

**Figure S4.** Copy of  $^{13}\text{C}$  NMR spectrum of the derivative **7a**.

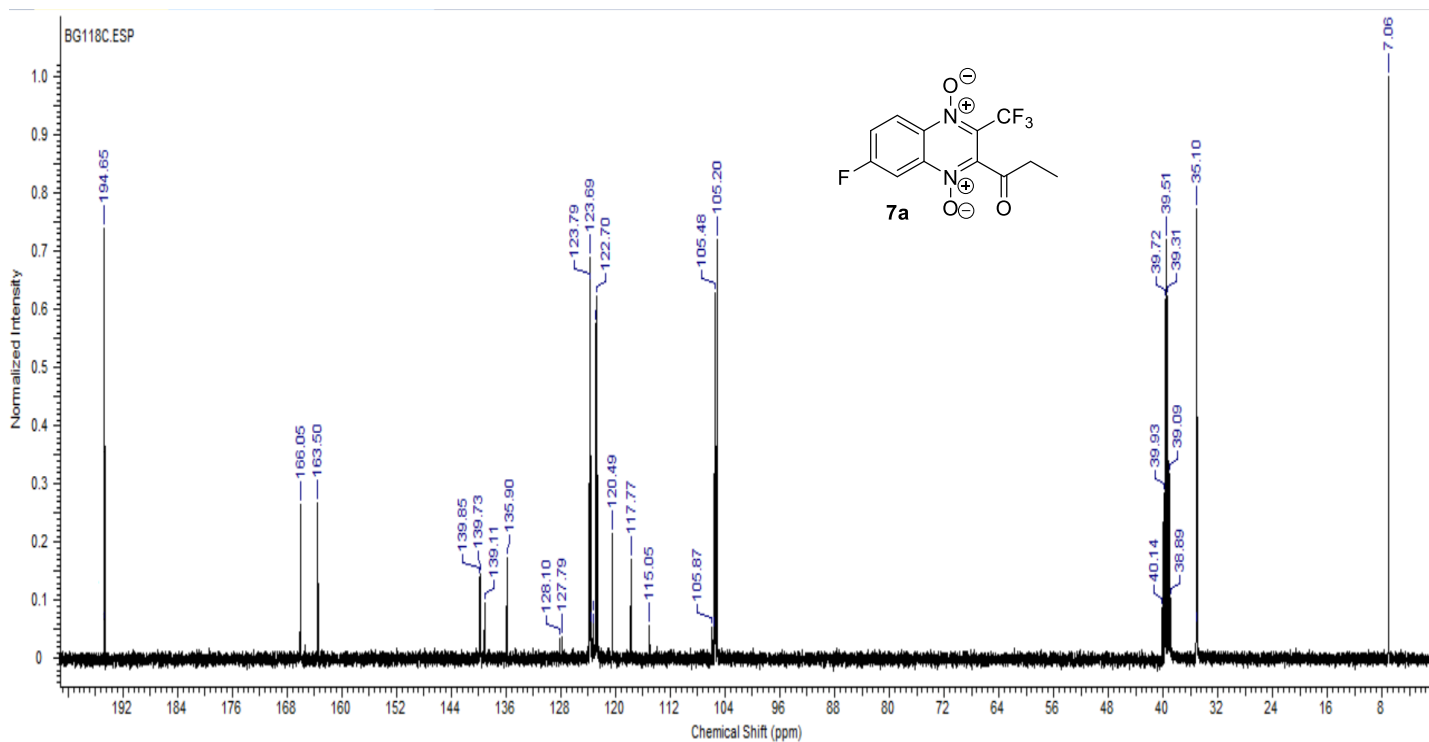

**Figure S5.** Copy of  $^1\text{H}$  NMR spectrum of the derivative **12a**.

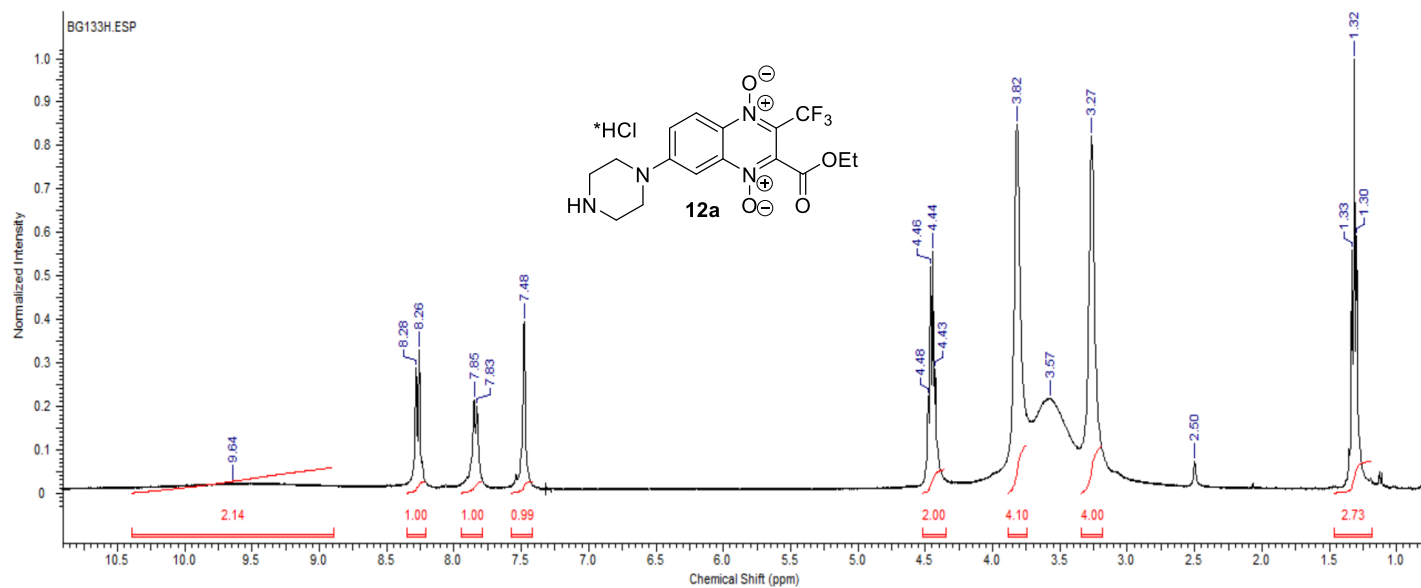

**Figure S6.** Copy of  $^{13}\text{C}$  NMR spectrum of the derivative **12a**.

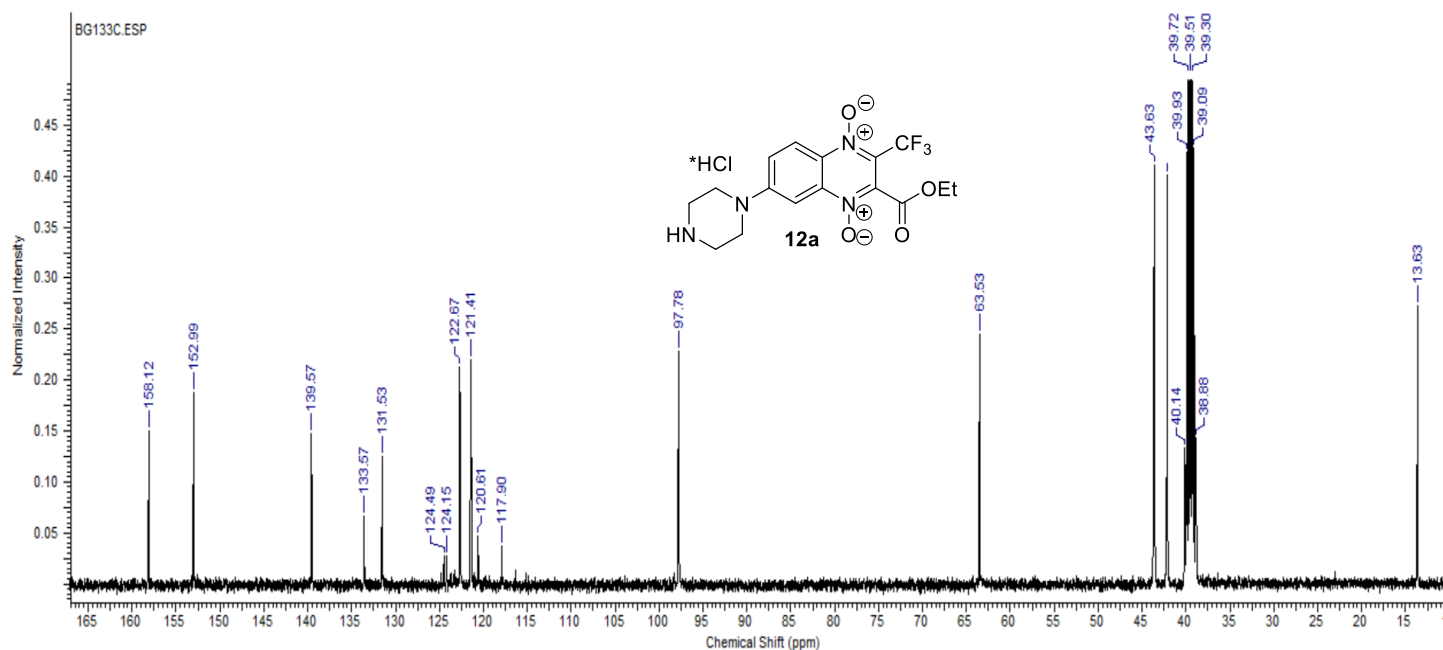

**Figure S7.** Copy of  $^1\text{H}$  NMR spectrum of the derivative **12b**.

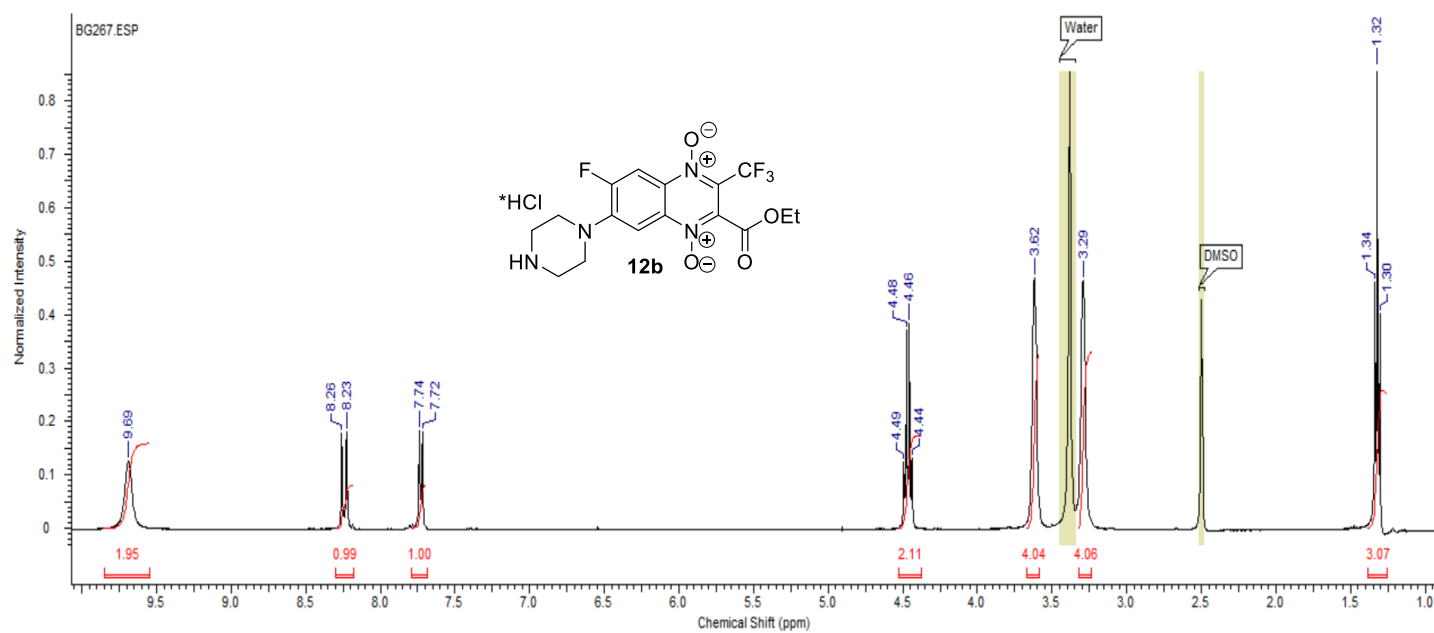

**Figure S8.** Copy of  $^{13}\text{C}$  NMR spectrum of the derivative **12b**.

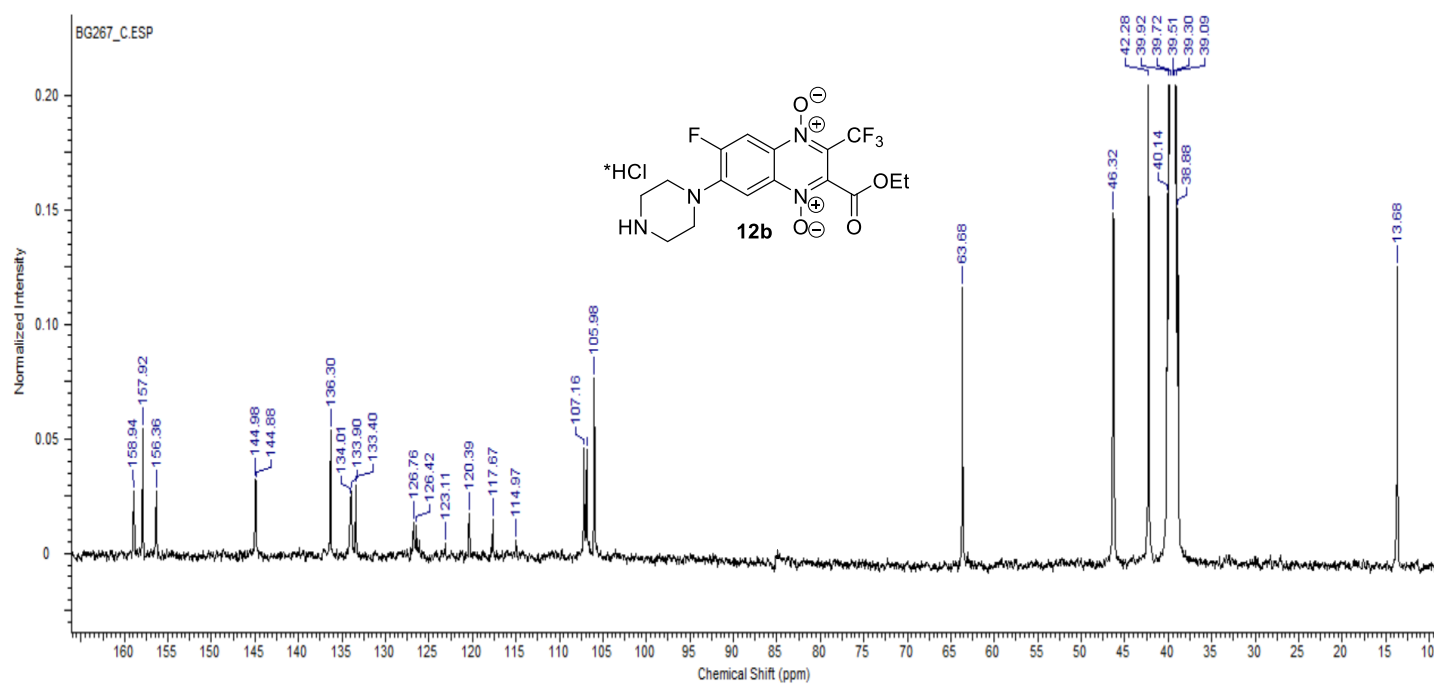

**Figure S9.** Copy of  $^1\text{H}$  NMR spectrum of the derivative **12c**.

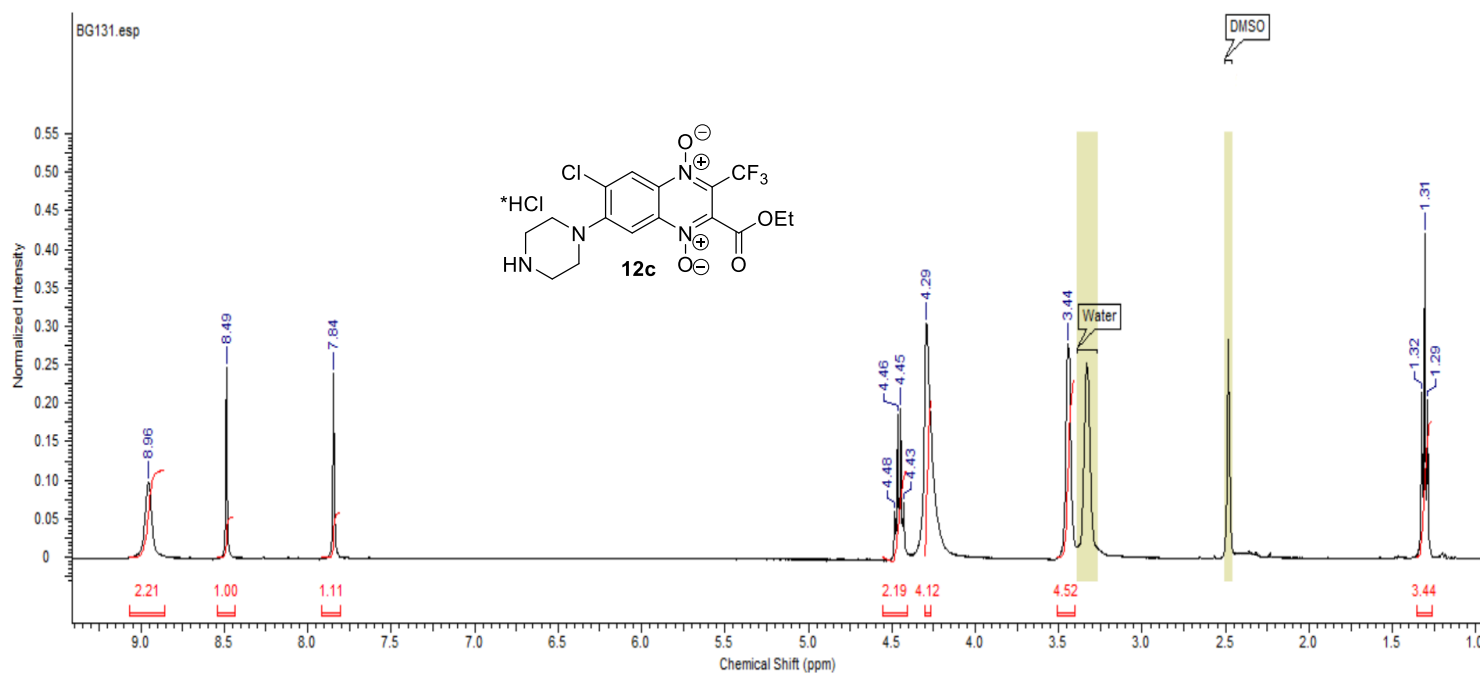

**Figure S10.** Copy of  $^{13}\text{C}$  NMR spectrum of the derivative **12c**.

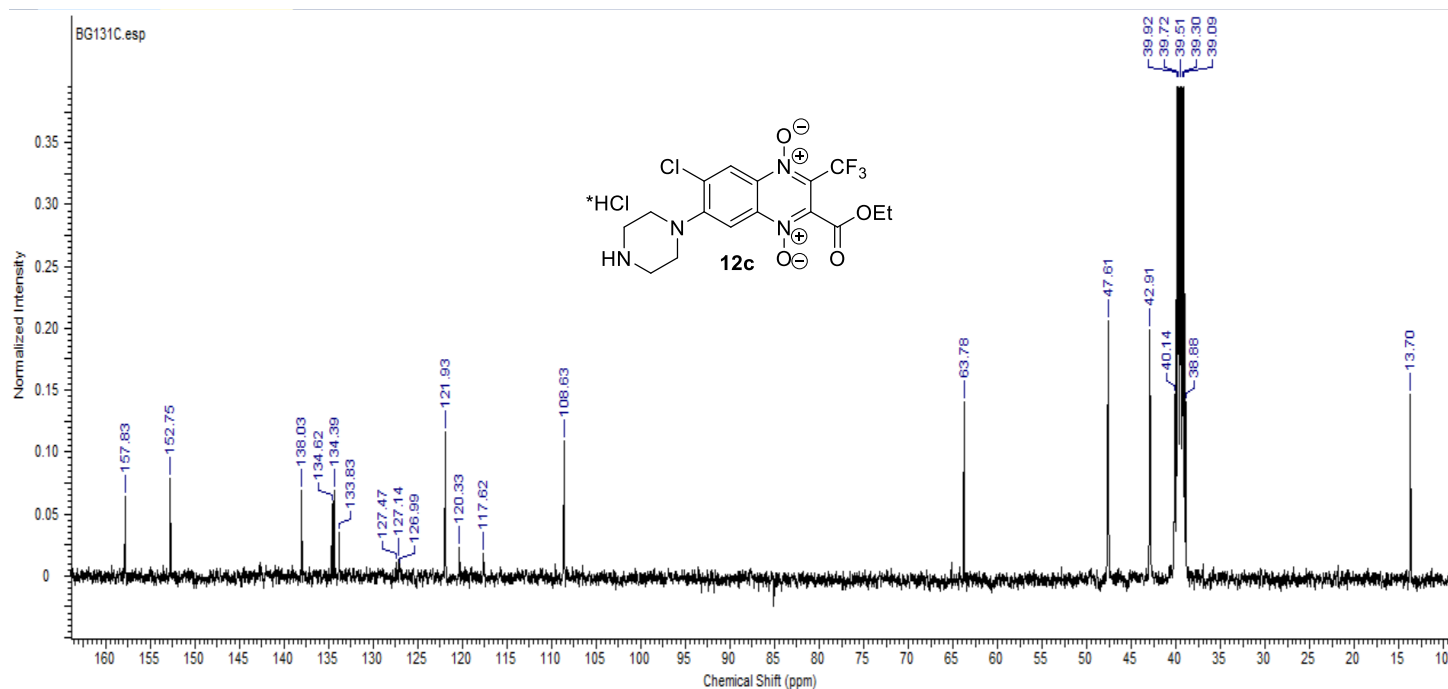

**Figure S11.** Copy of  $^1\text{H}$  NMR spectrum of the derivative **13a**.

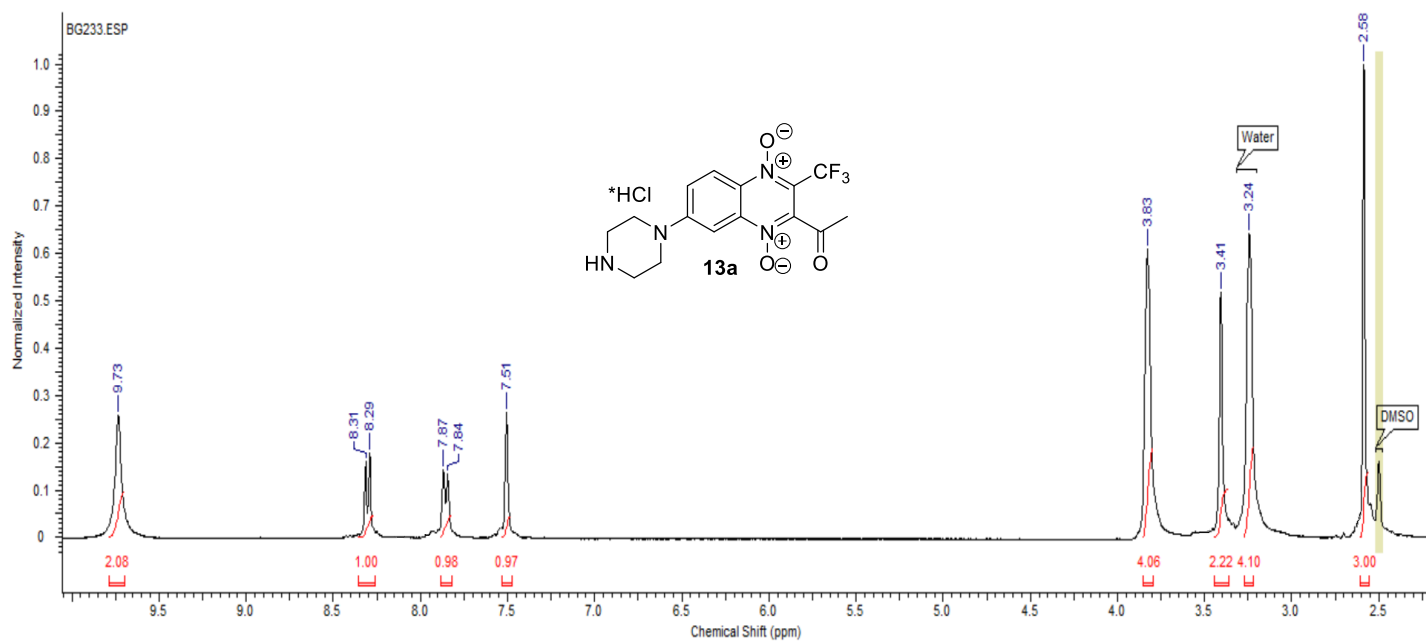

**Figure S12.** Copy of  $^{13}\text{C}$  NMR spectrum of the derivative **13a**.

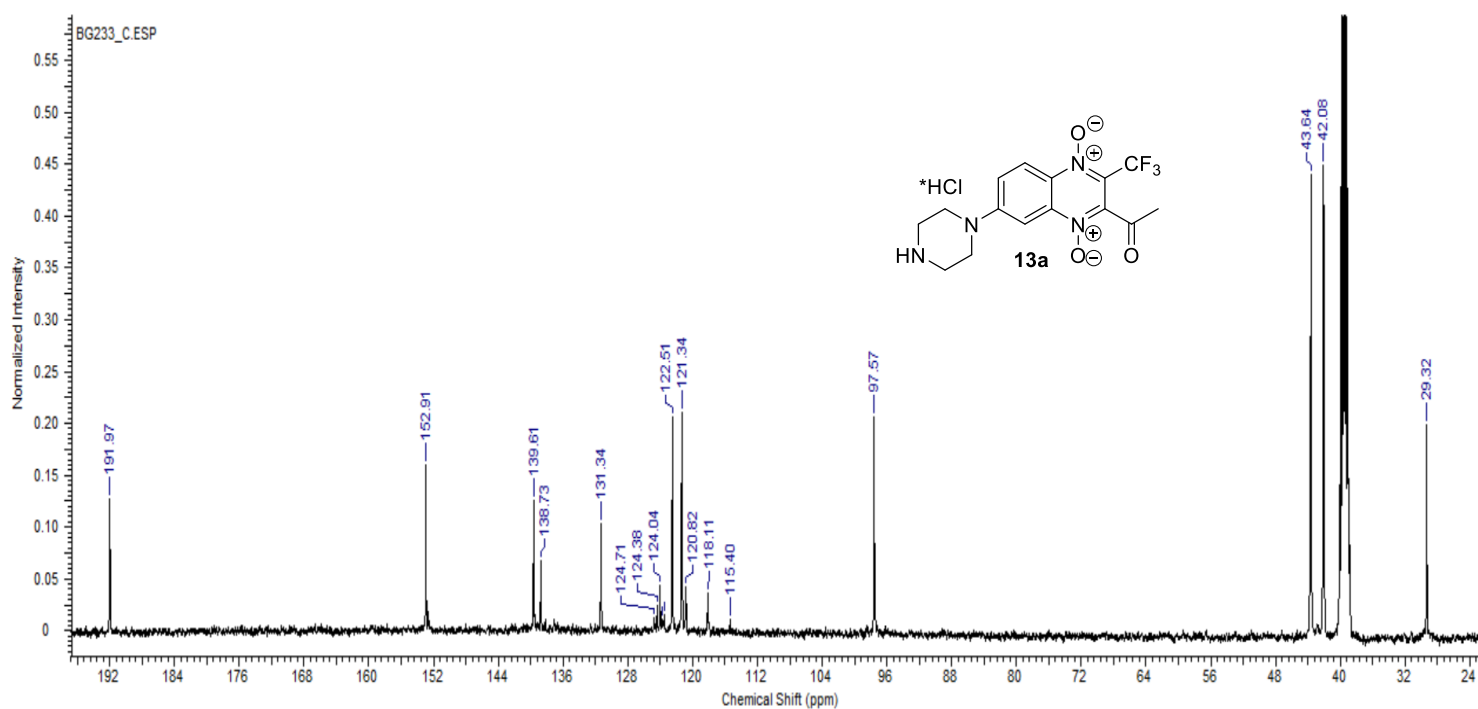



**Figure S13.** Copy of  $^1\text{H}$  NMR spectrum of the derivative **13b**.

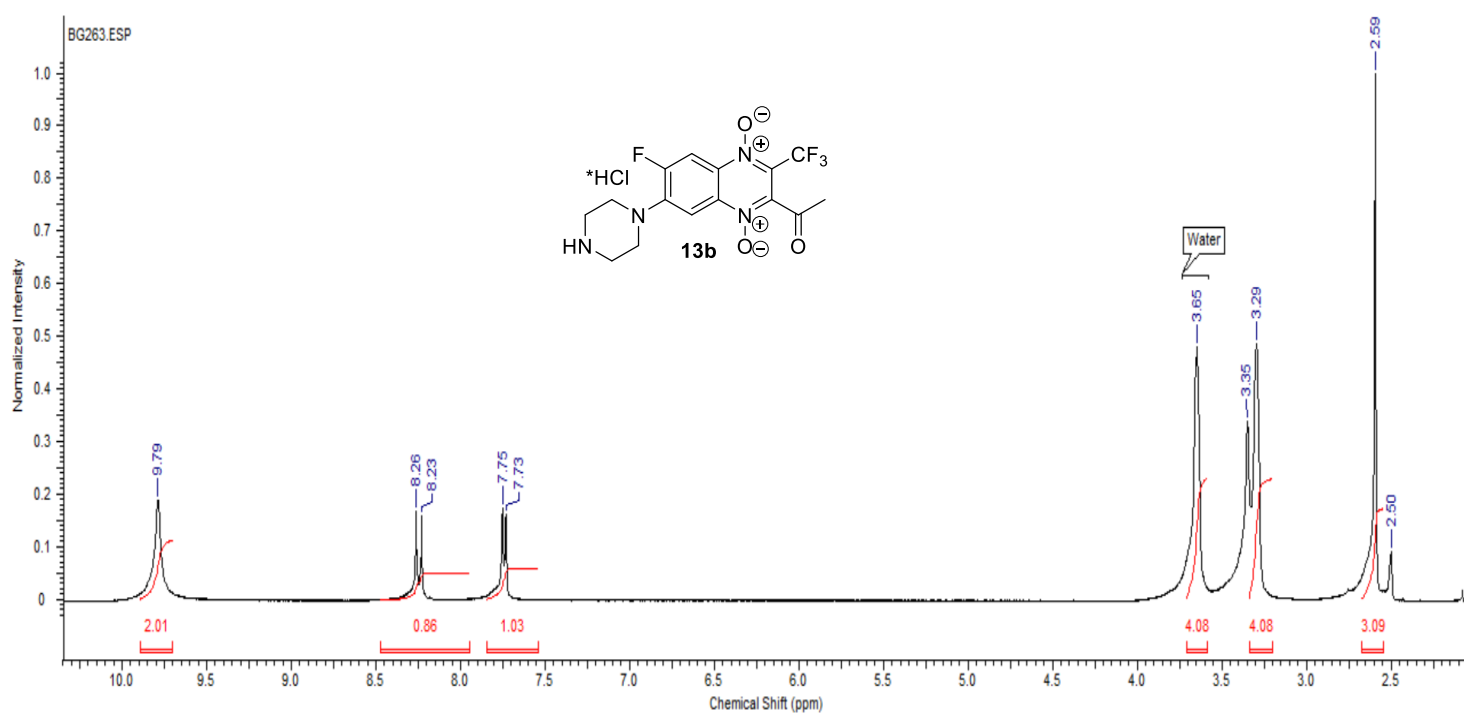

**Figure S14.** Copy of  $^{13}\text{C}$  NMR spectrum of the derivative **13b**.

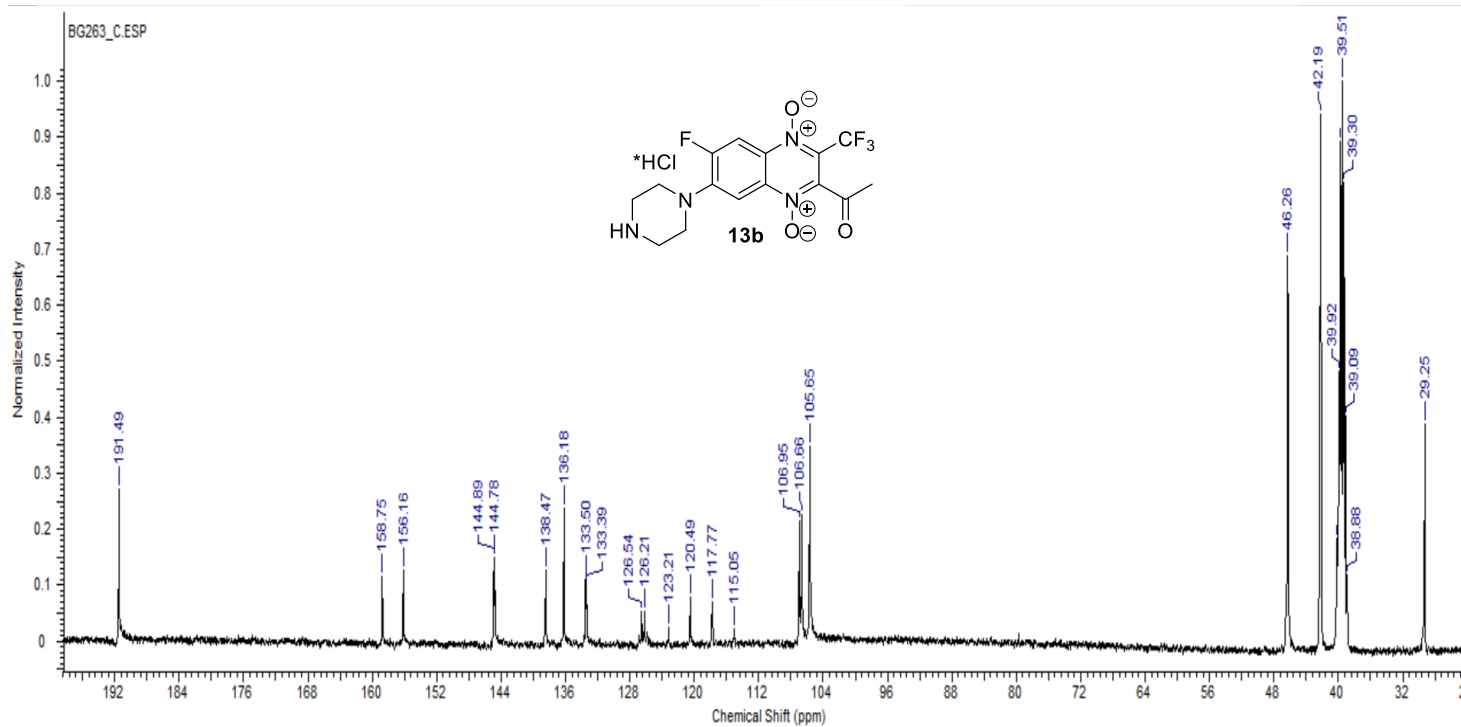

**Figure S15.** Copy of  $^1\text{H}$  NMR spectrum of the derivative **13c**.

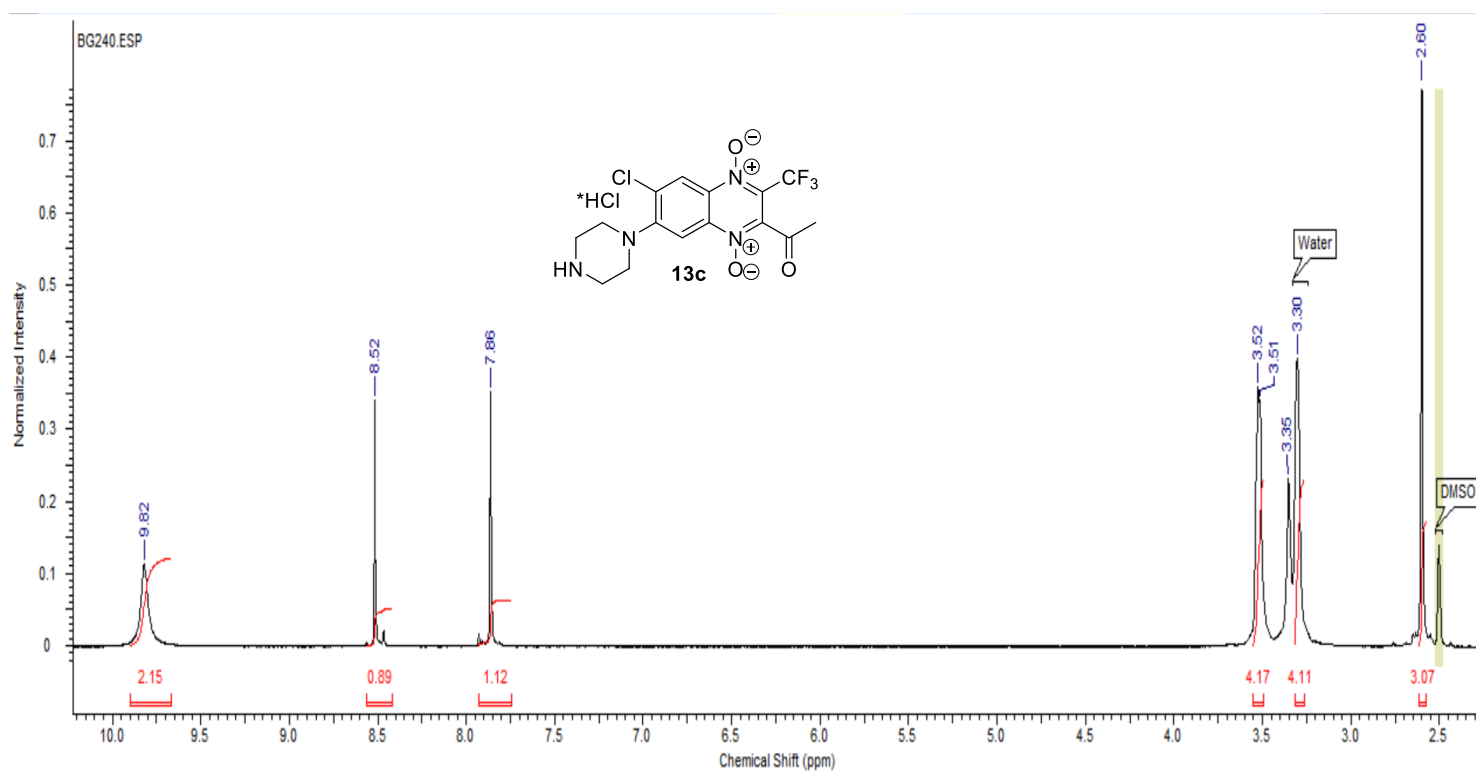

**Figure S16.** Copy of  $^{13}\text{C}$  NMR spectrum of the derivative **13c**.

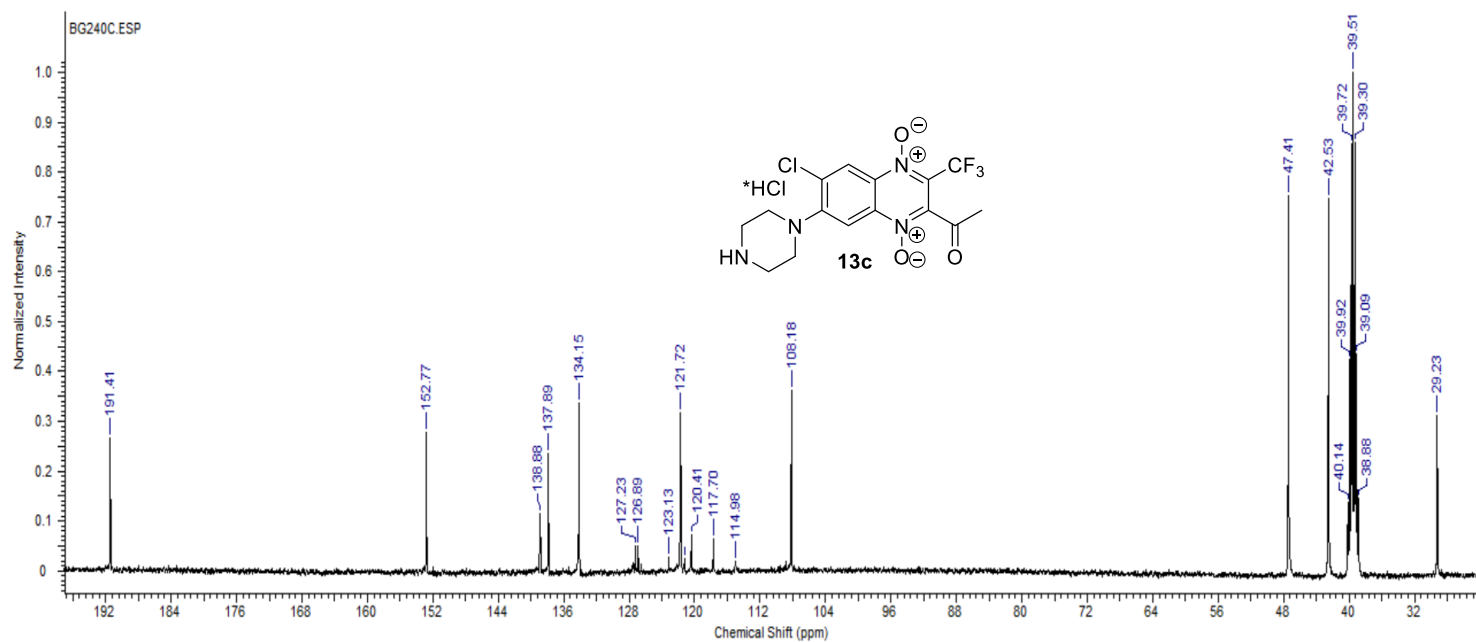

**Figure S17.** Copy of  $^1\text{H}$  NMR spectrum of the derivative **14a**.

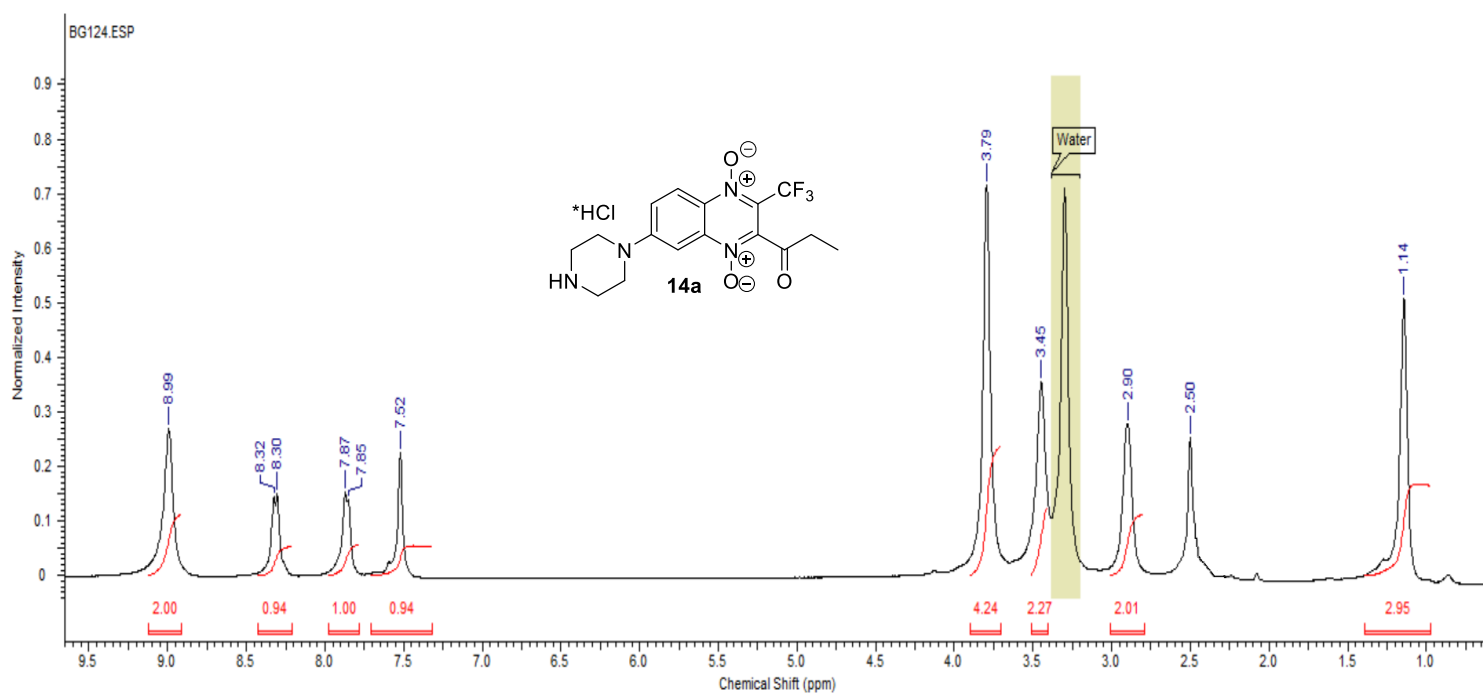

**Figure S18.** Copy of  $^{13}\text{C}$  NMR spectrum of the derivative **14a**.

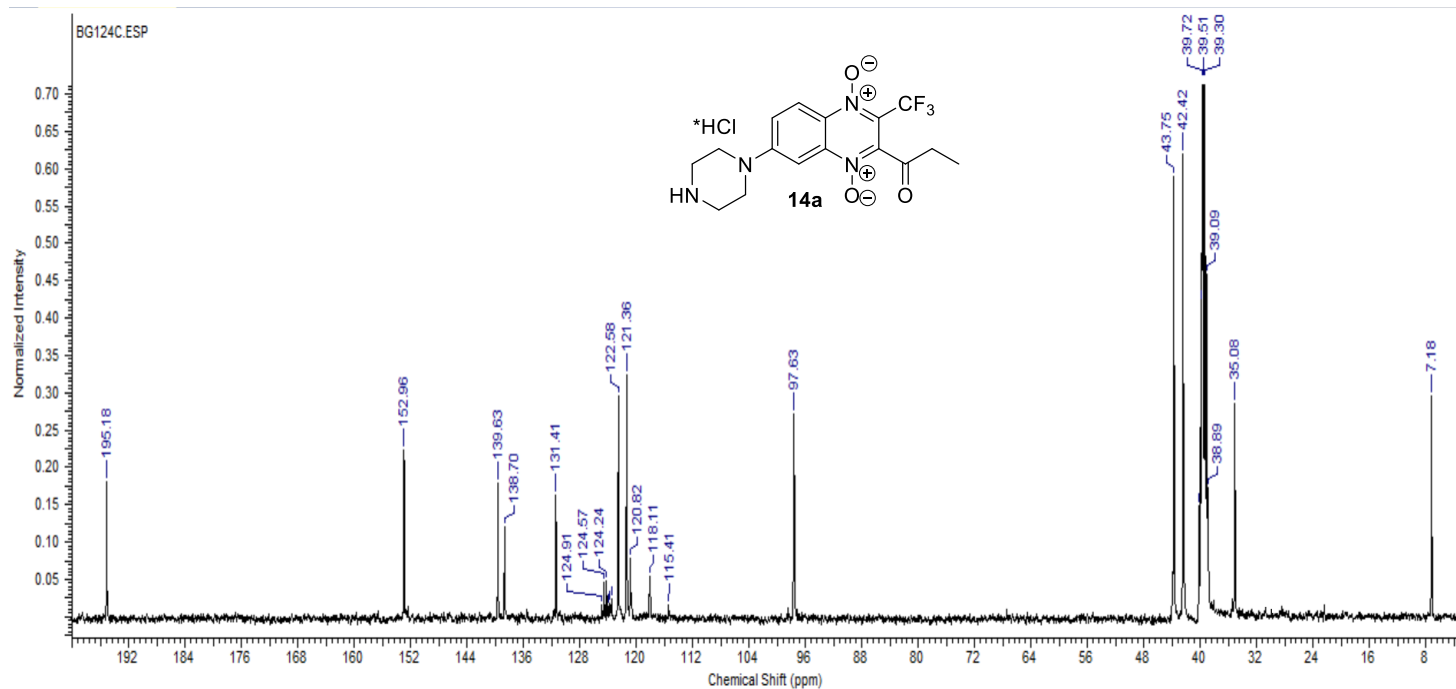

**Figure S19.** Copy of  $^1\text{H}$  NMR spectrum of the derivative **14b**.

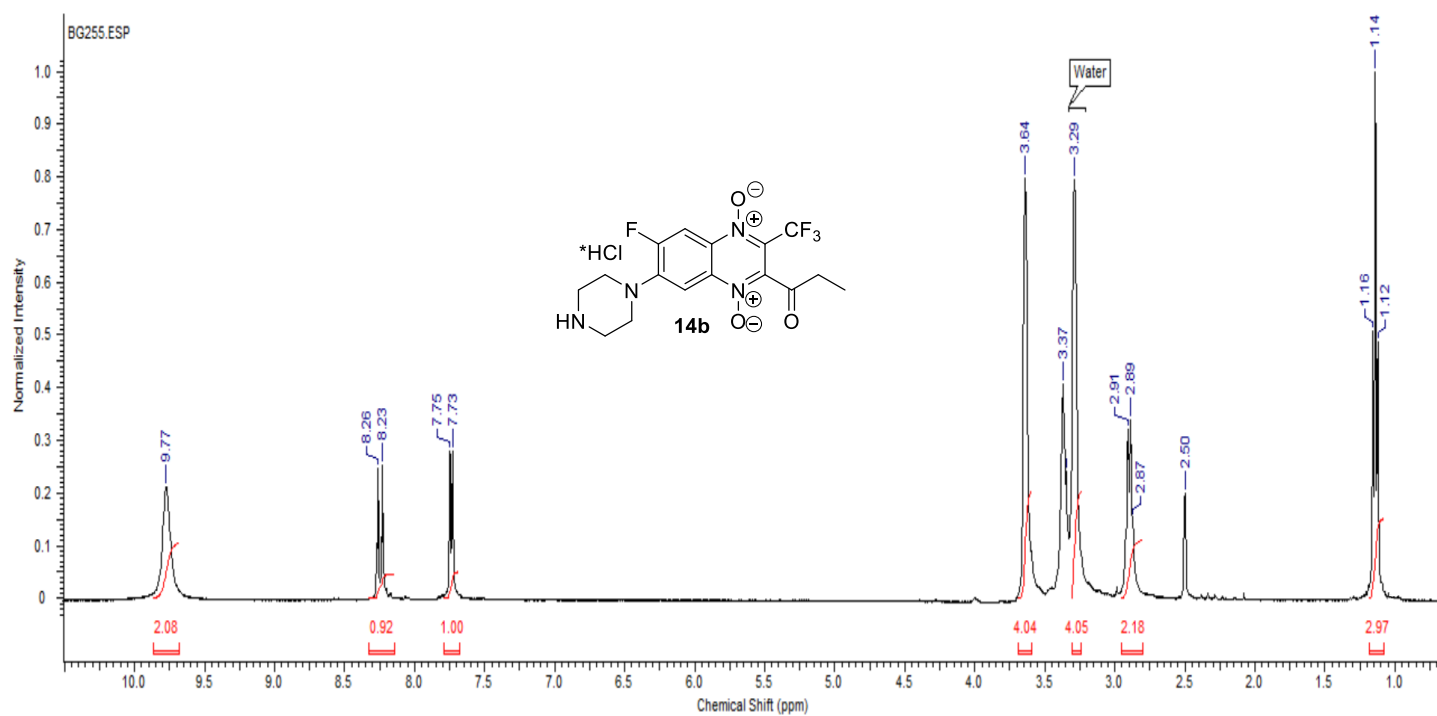

**Figure S20.** Copy of  $^{13}\text{C}$  NMR spectrum of the derivative **14b**.

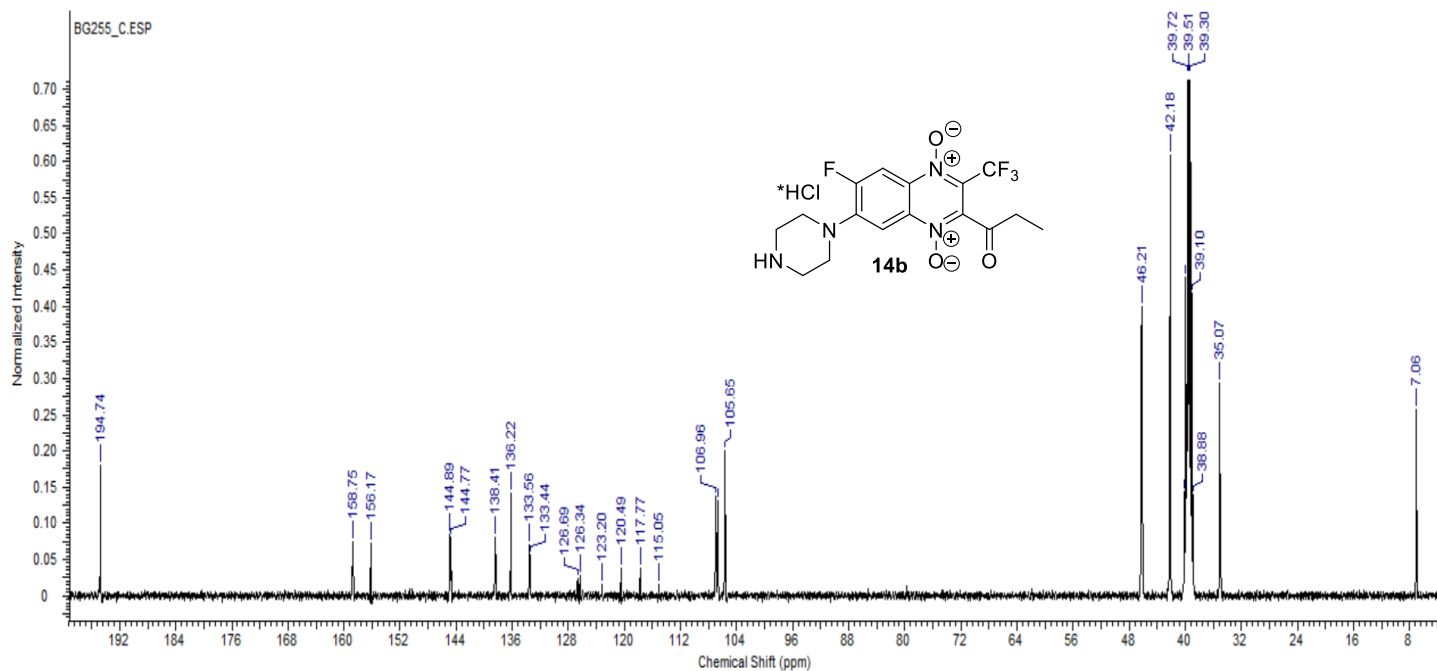

**Figure S21.** Copy of  $^1\text{H}$  NMR spectrum of the derivative **14c**.

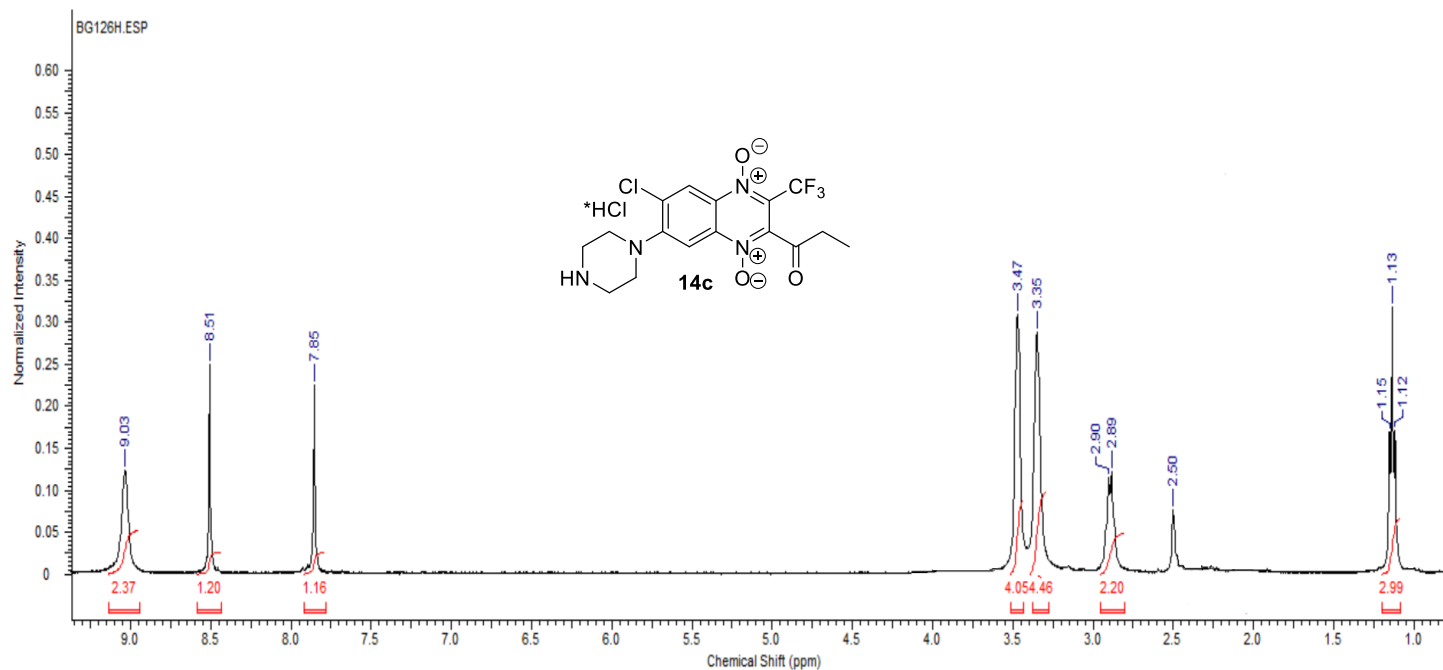

**Figure S22.** Copy of  $^{13}\text{C}$  NMR spectrum of the derivative **14c**.

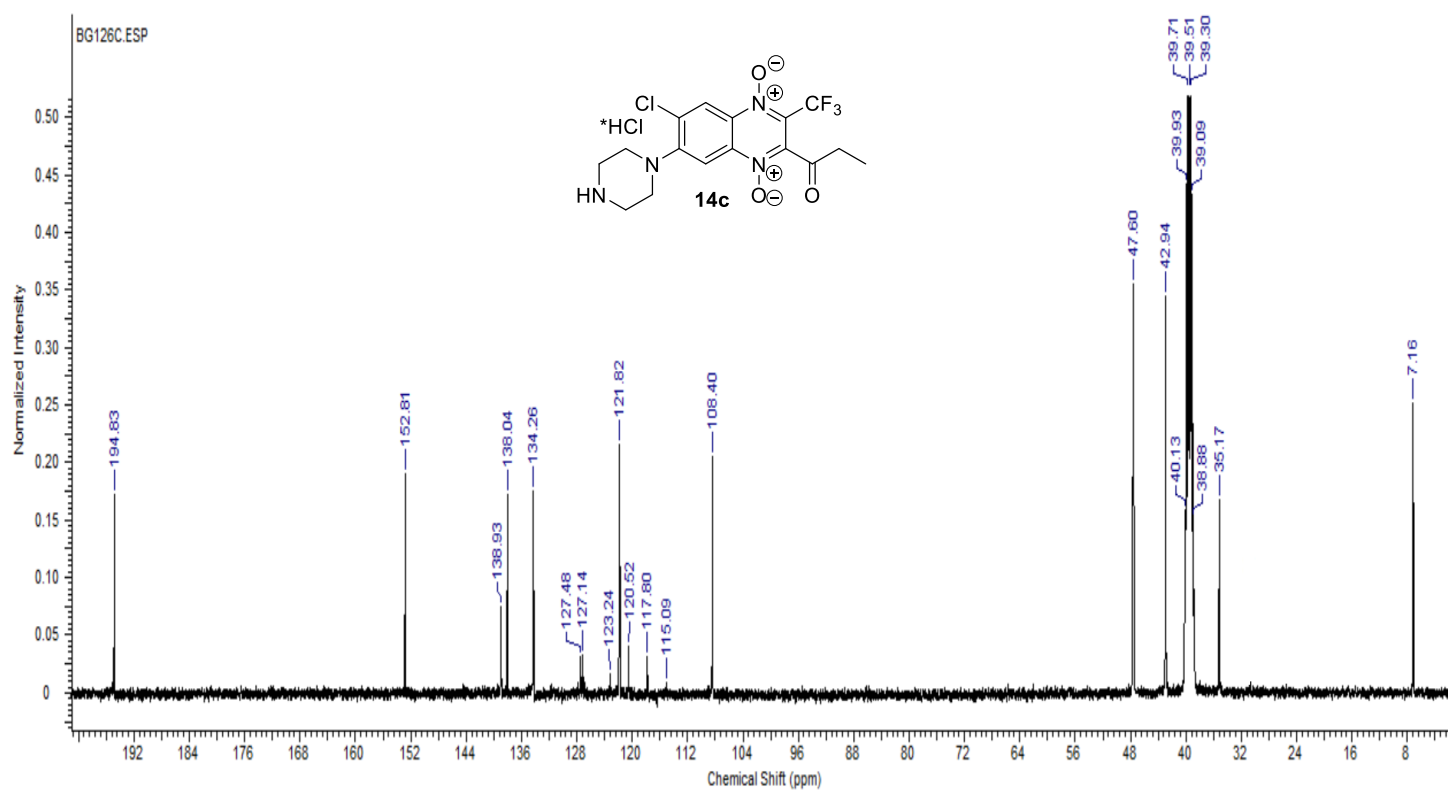

**Figure S23.** Copy of  $^1\text{H}$  NMR spectrum of the derivative **15a**.

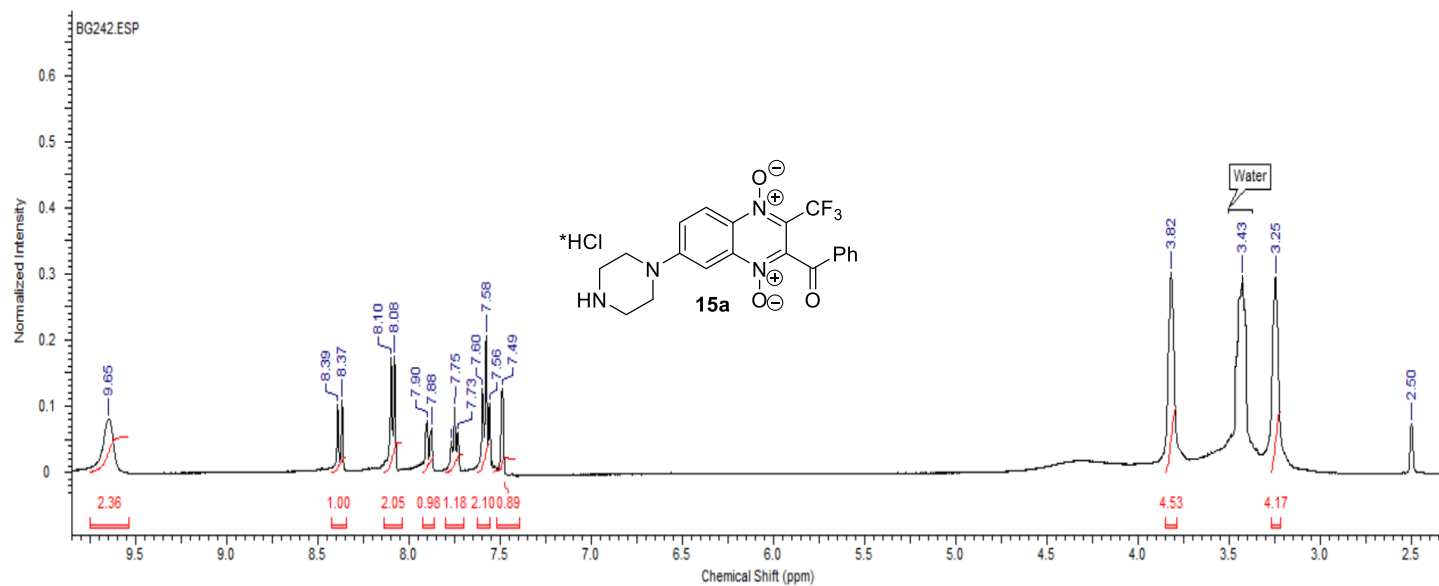

**Figure S24.** Copy of  $^{13}\text{C}$  NMR spectrum of the derivative **15a**.

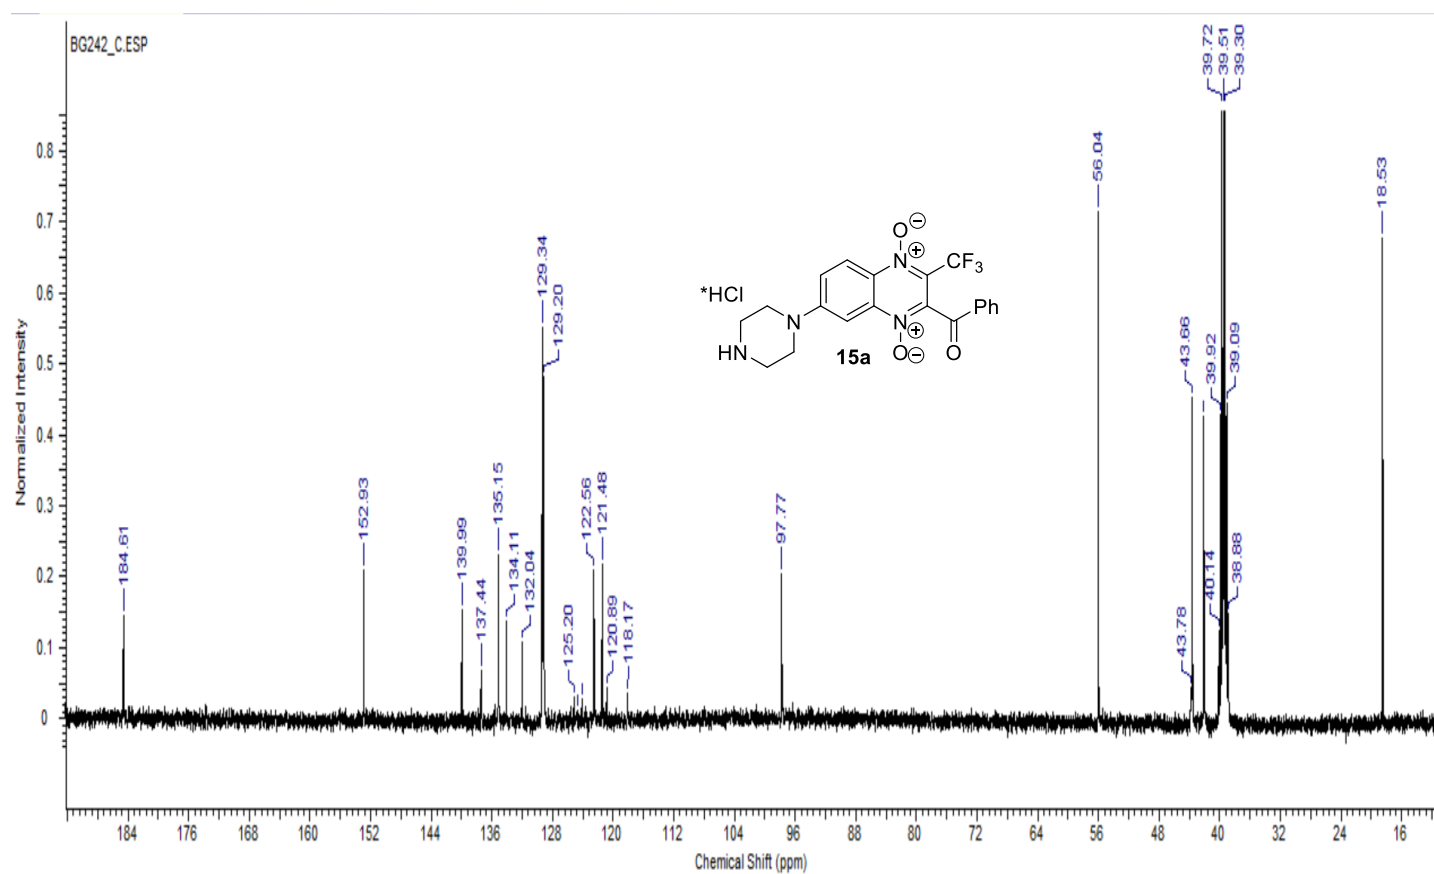

**Figure S25.** Copy of  $^1\text{H}$  NMR spectrum of the derivative **15b**.

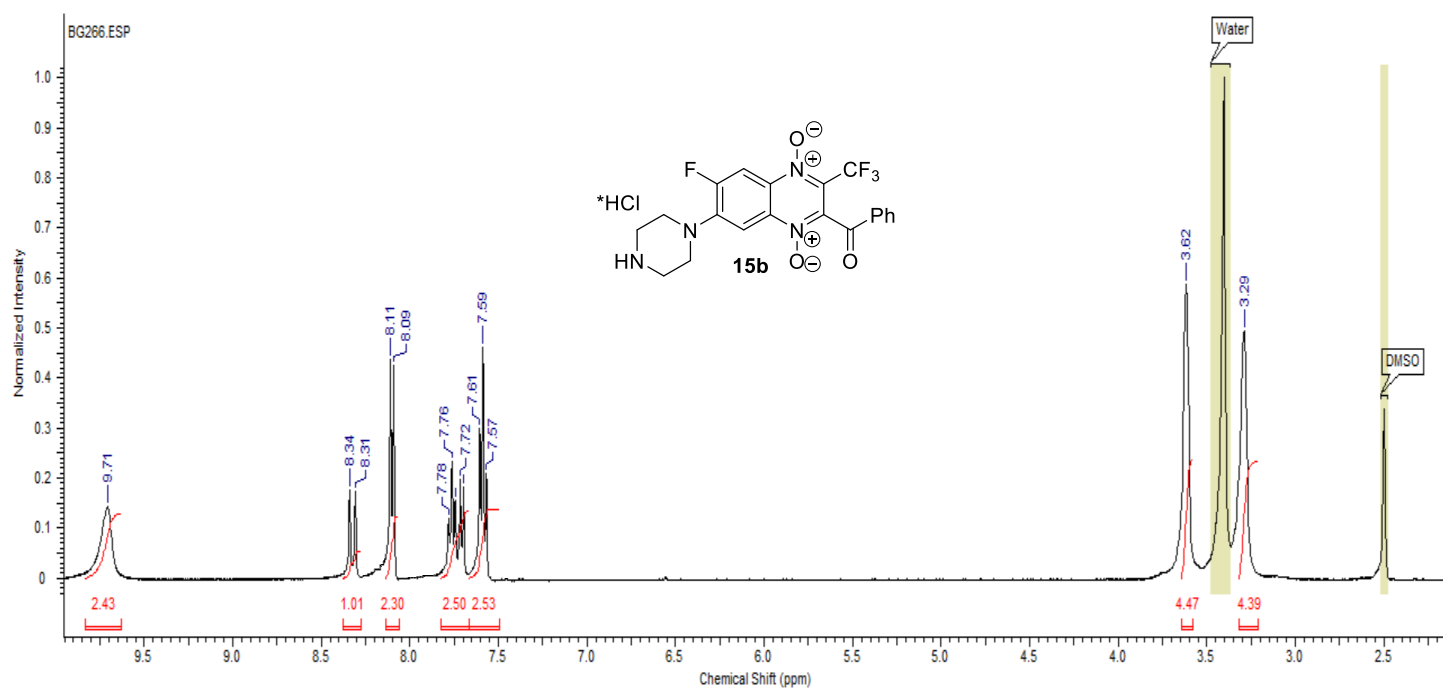

**Figure S26.** Copy of  $^{13}\text{C}$  NMR spectrum of the derivative **15b**.

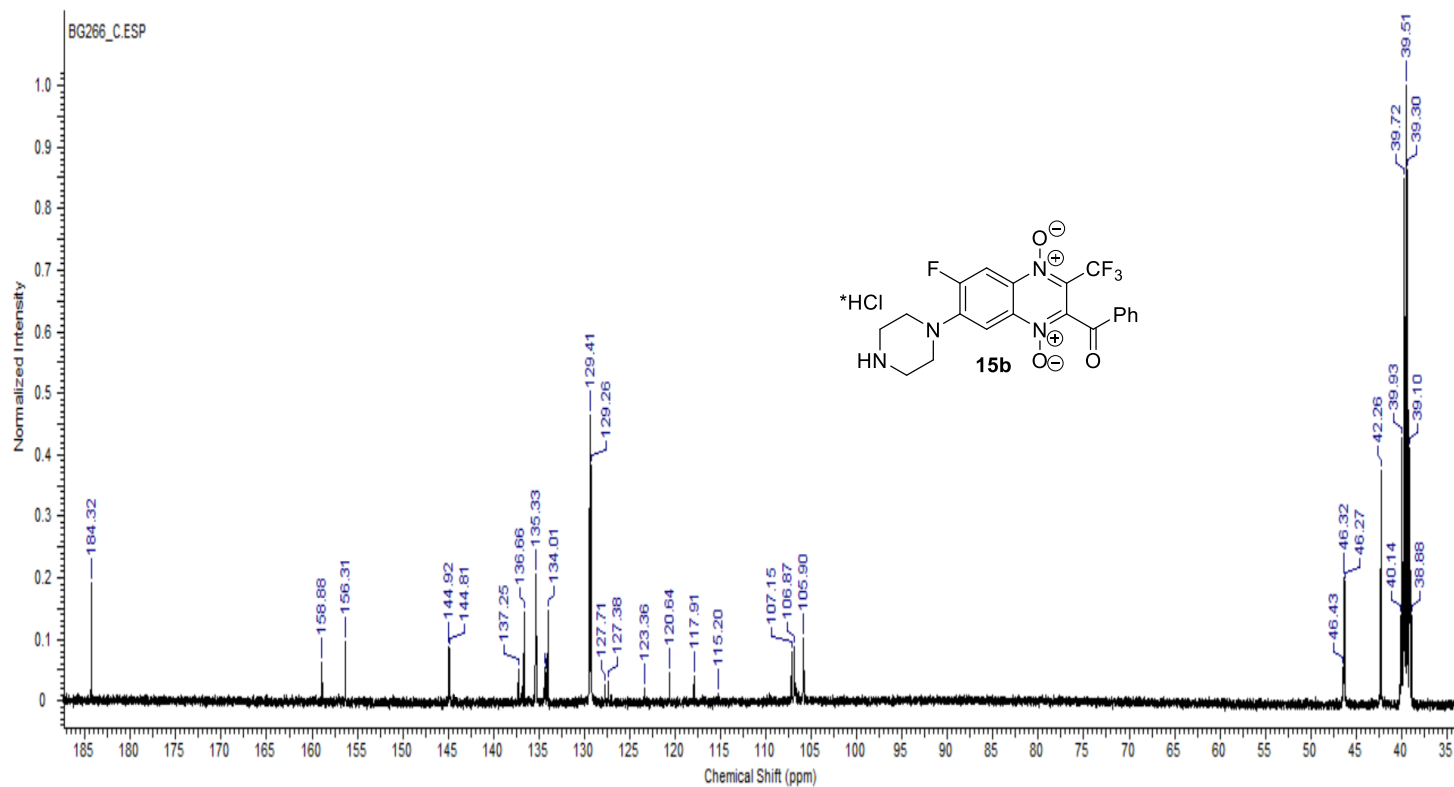

**Figure S27.** Copy of  $^1\text{H}$  NMR spectrum of the derivative **15c**.

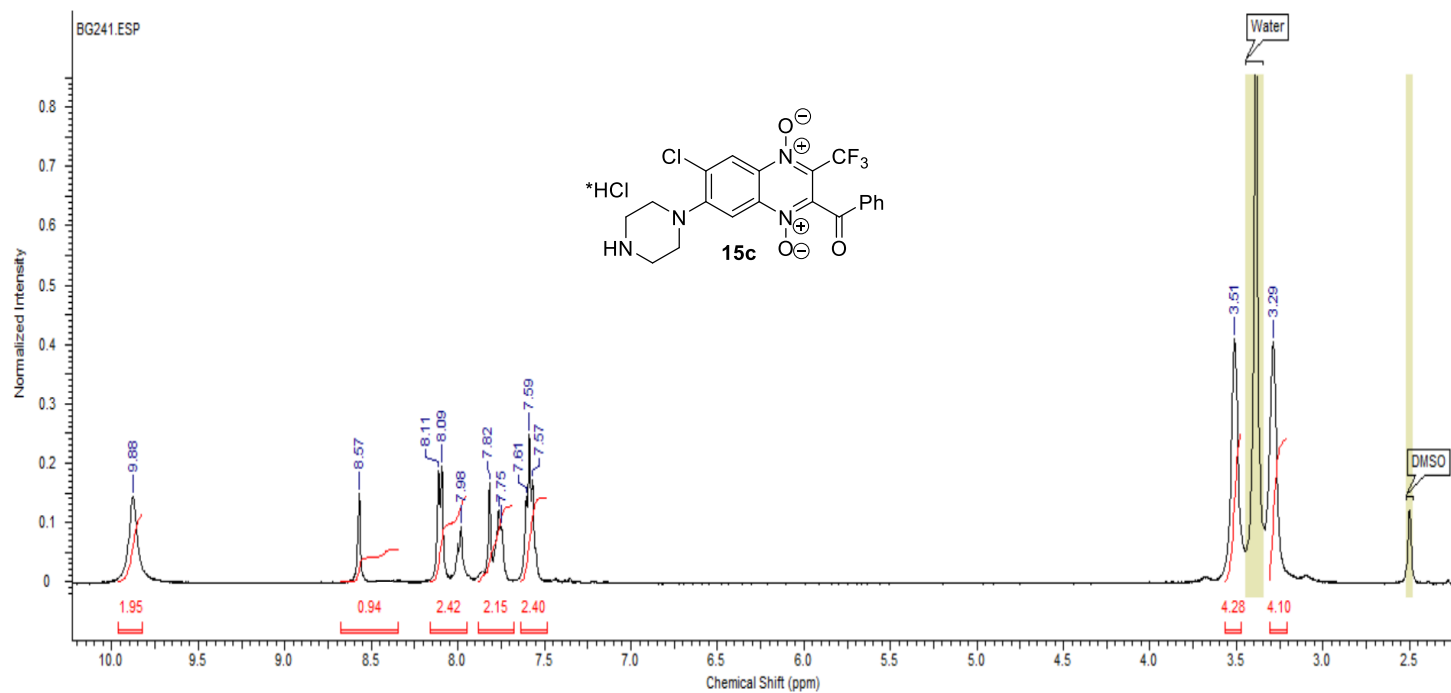

**Figure S28.** Copy of  $^{13}\text{C}$  NMR spectrum of the derivative **15c**.

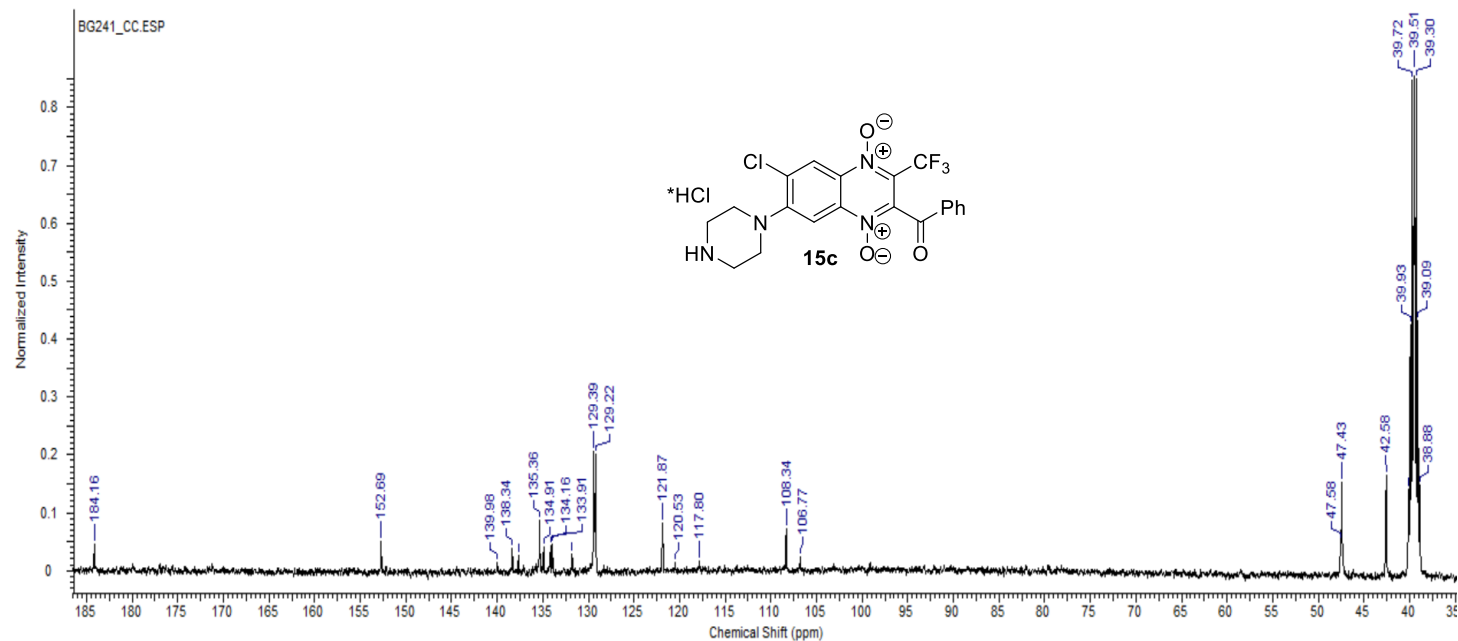



**Figure S29.** Copy of  $^1\text{H}$  NMR spectrum of the derivative **15d**.

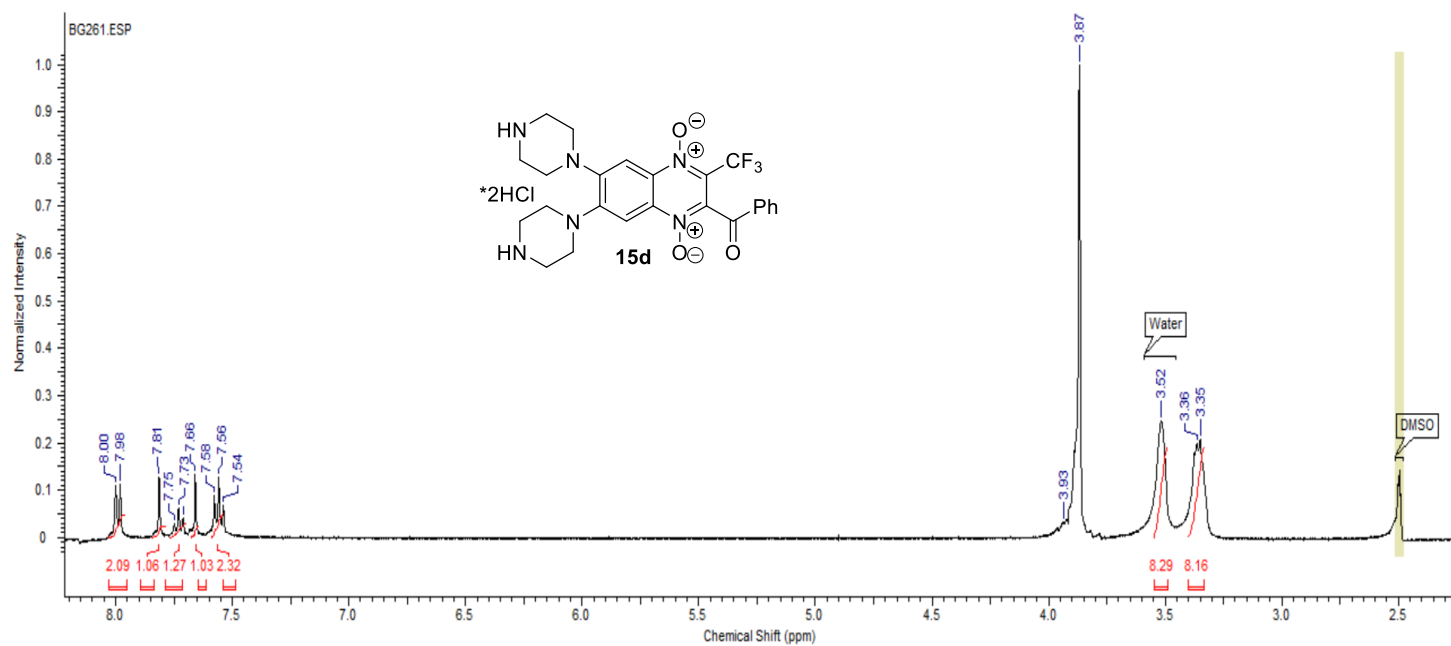

**Figure S30.** Copy of  $^{13}\text{C}$  NMR spectrum of the derivative **15d**.

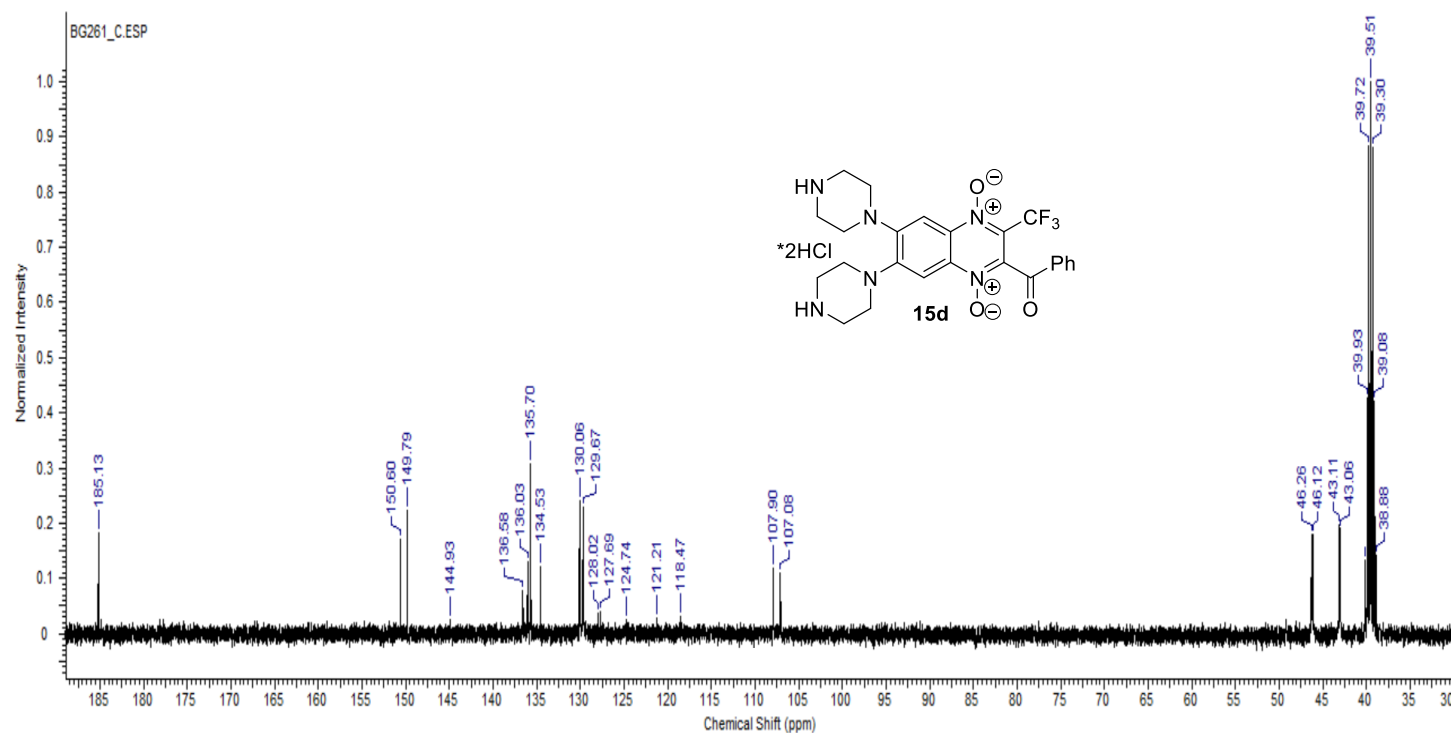

**Figure S31.** Copy of  $^1\text{H}$  NMR spectrum of the derivative **16a**.

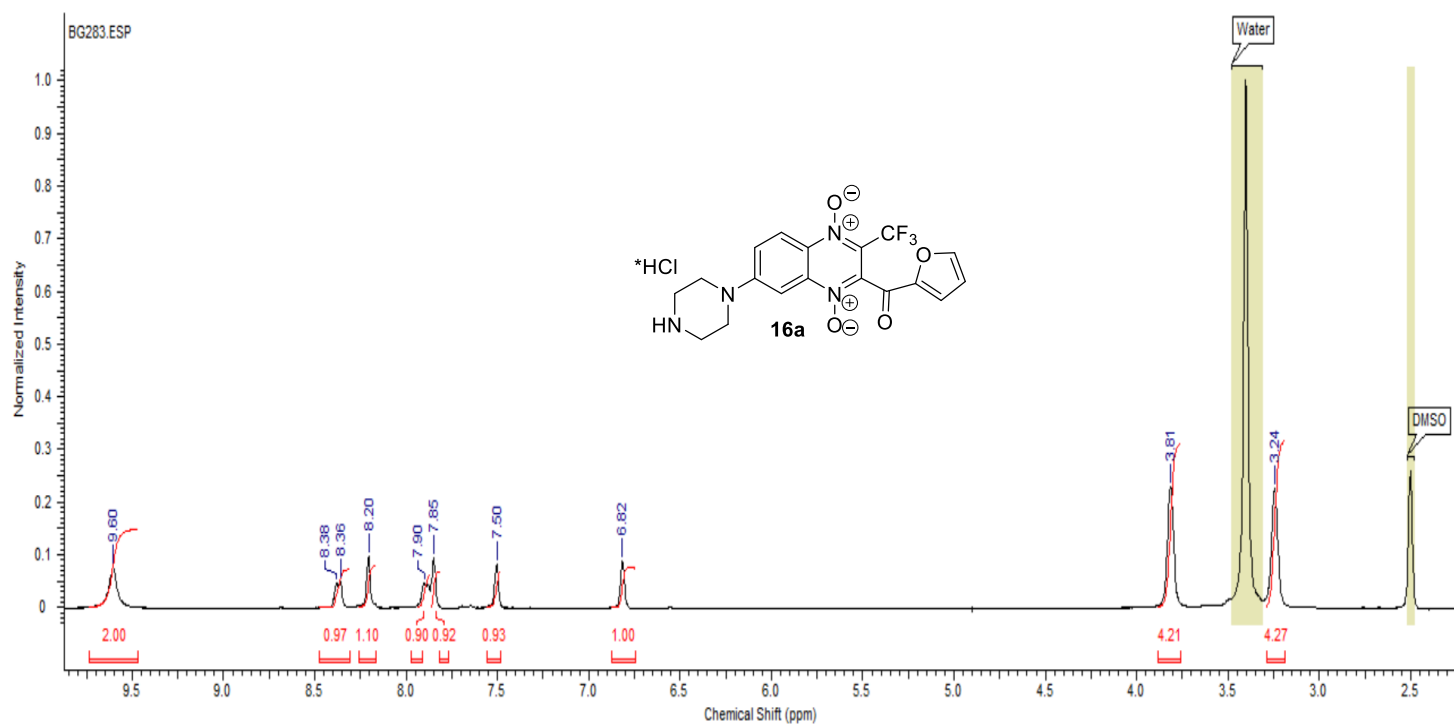

**Figure S32.** Copy of  $^{13}\text{C}$  NMR spectrum of the derivative **16a**.

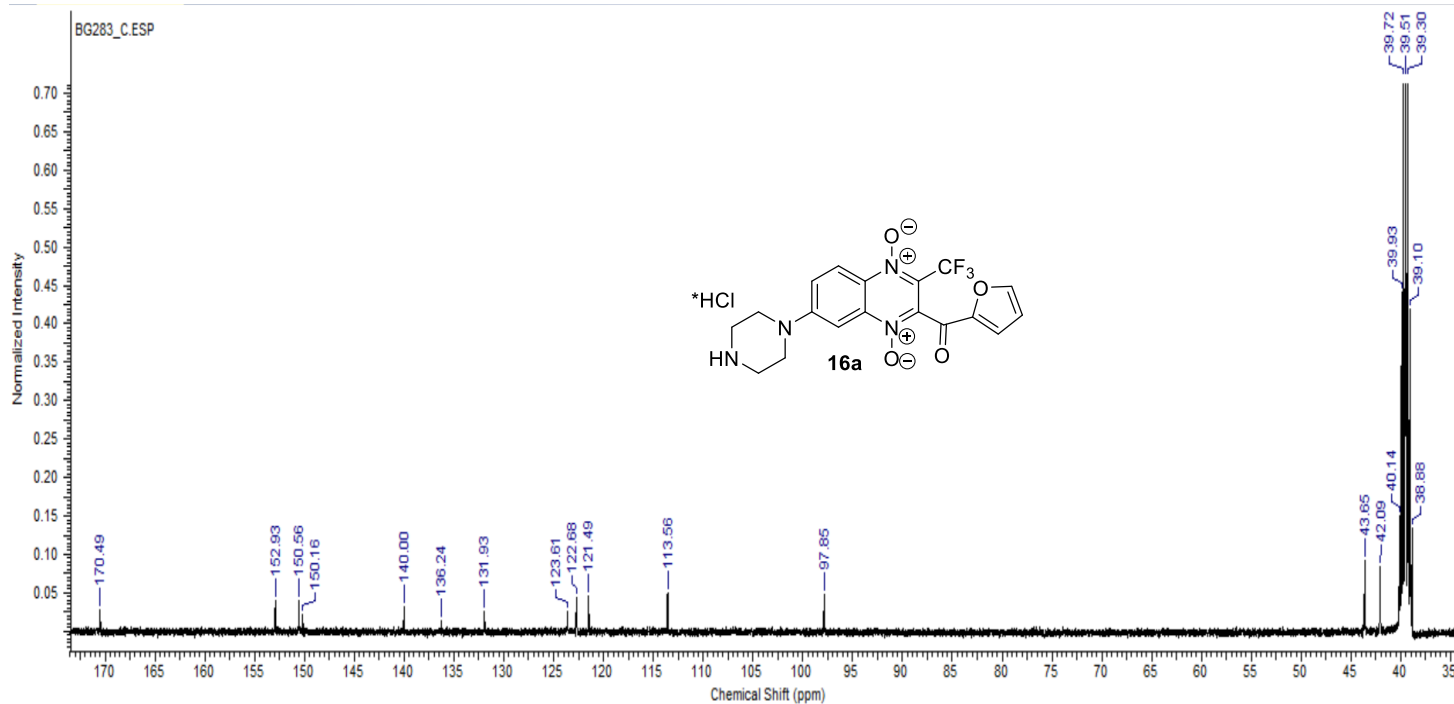

**Figure S33.** Copy of  $^1\text{H}$  NMR spectrum of the derivative **16b**.

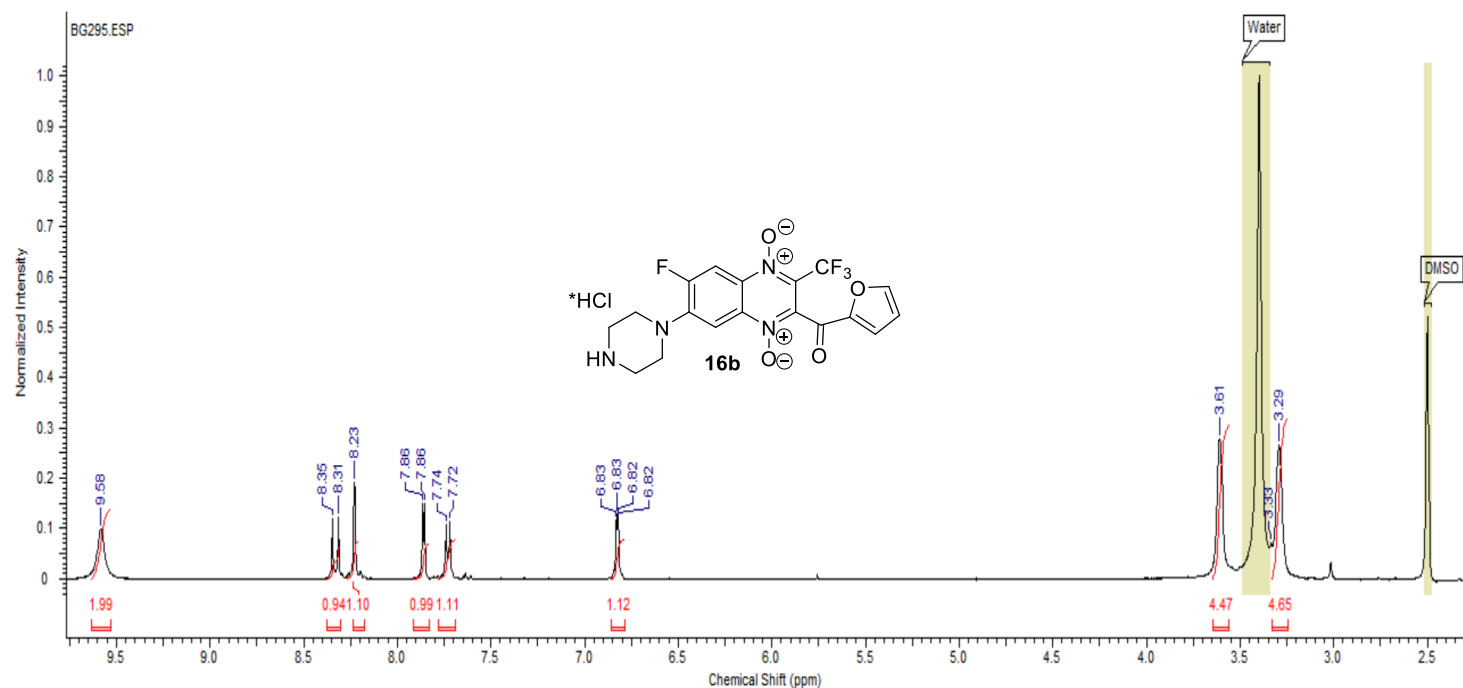

**Figure S34.** Copy of  $^{13}\text{C}$  NMR spectrum of the derivative **16b**.

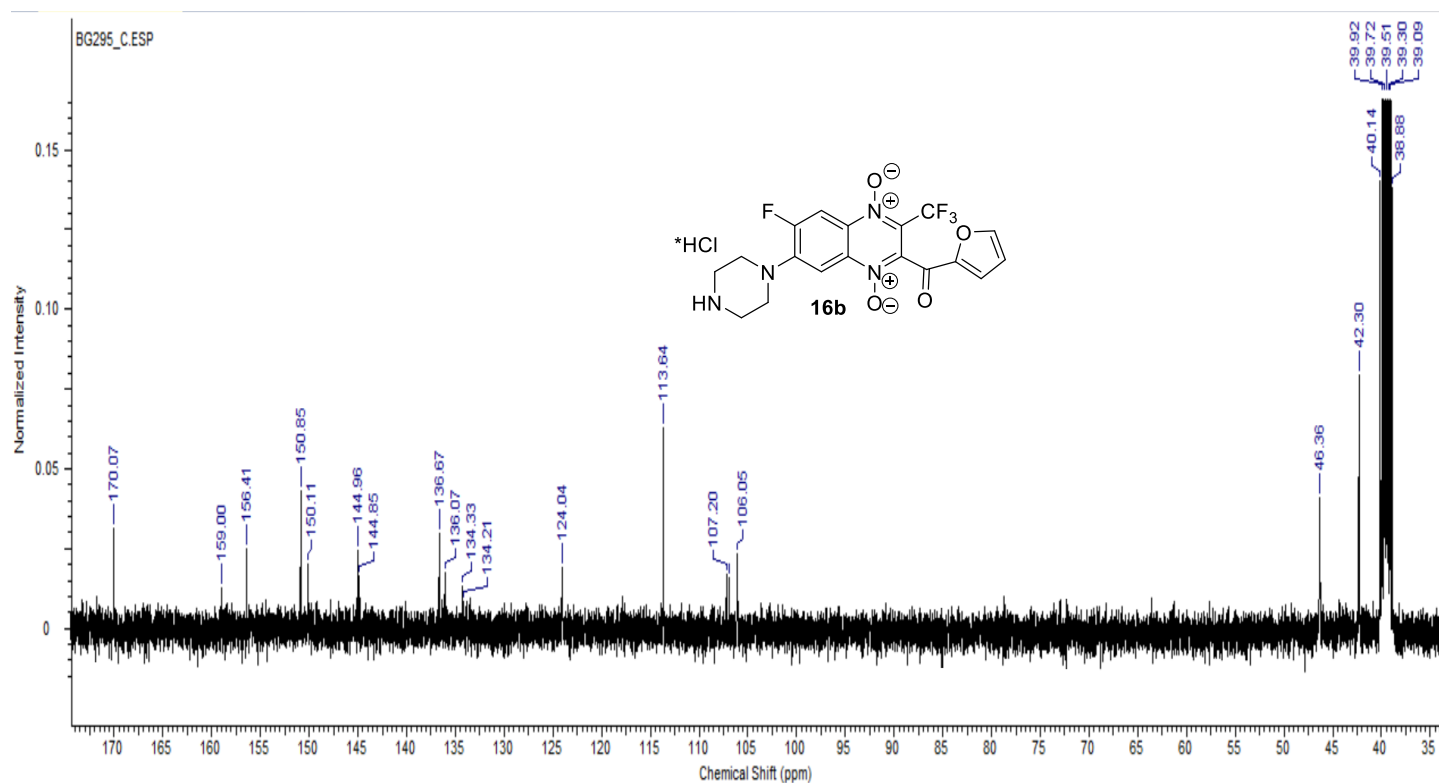

**Figure S35.** Copy of  $^1\text{H}$  NMR spectrum of the derivative **16c**.

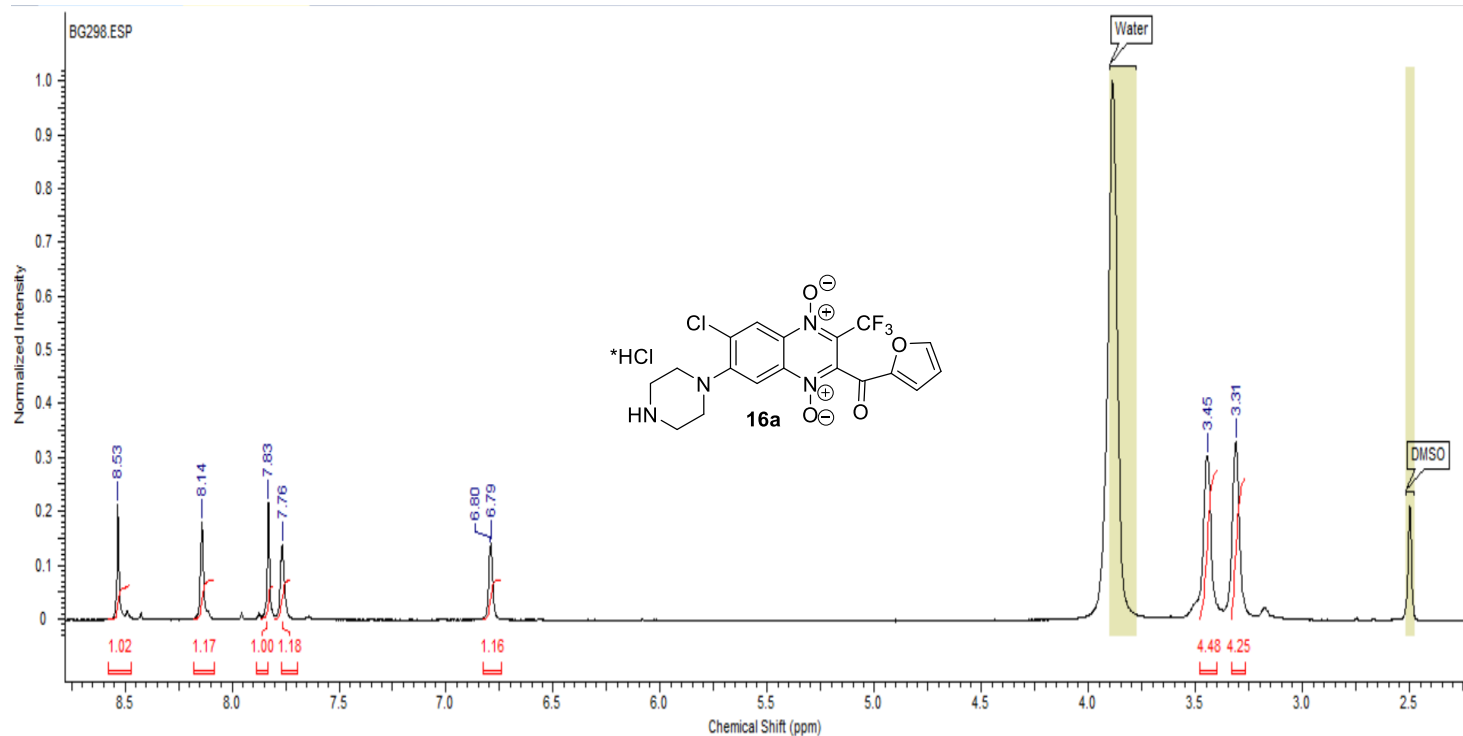

**Figure S36.** Copy of  $^{13}\text{C}$  NMR spectrum of the derivative **16c**.

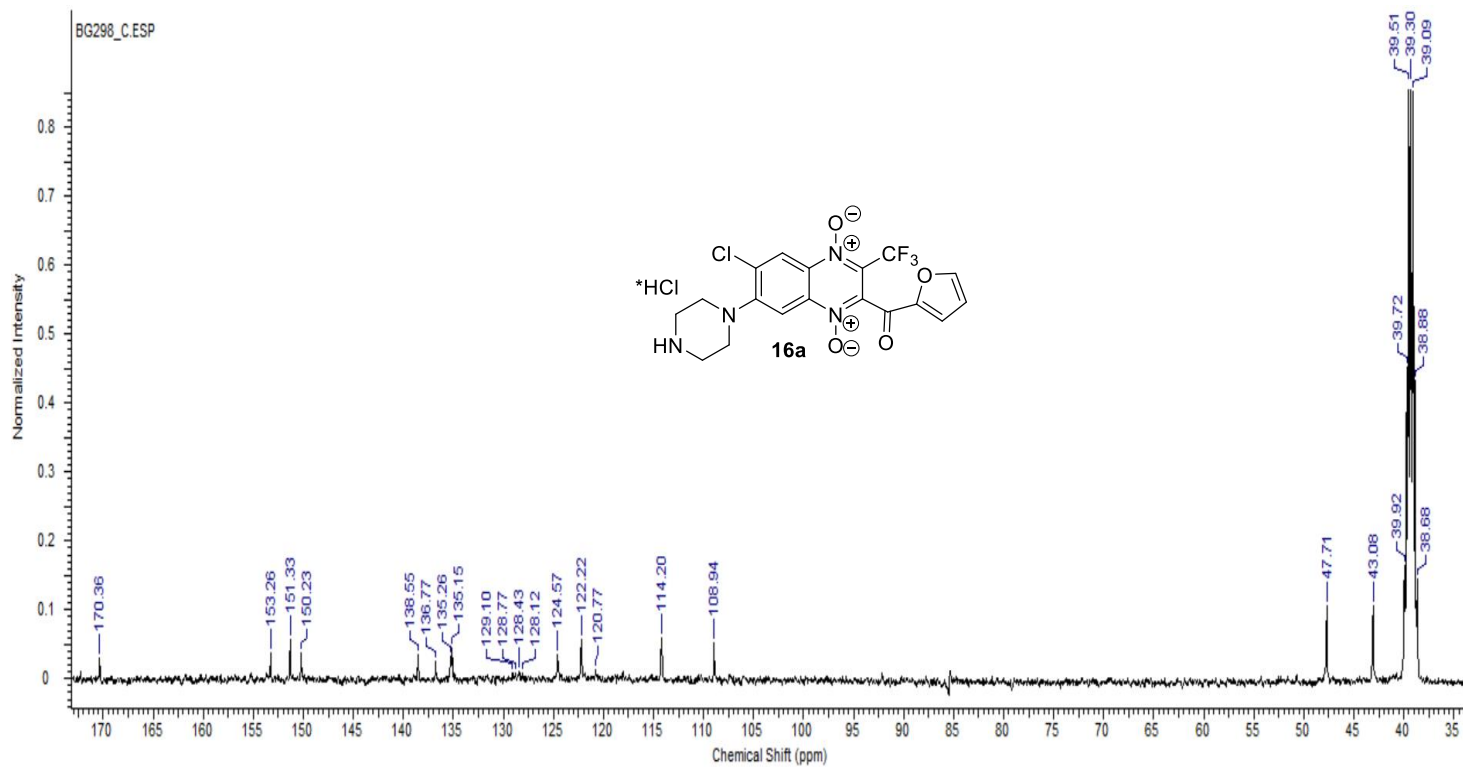

**Figure S37.** Copy of  $^1\text{H}$  NMR spectrum of the derivative **16d**.

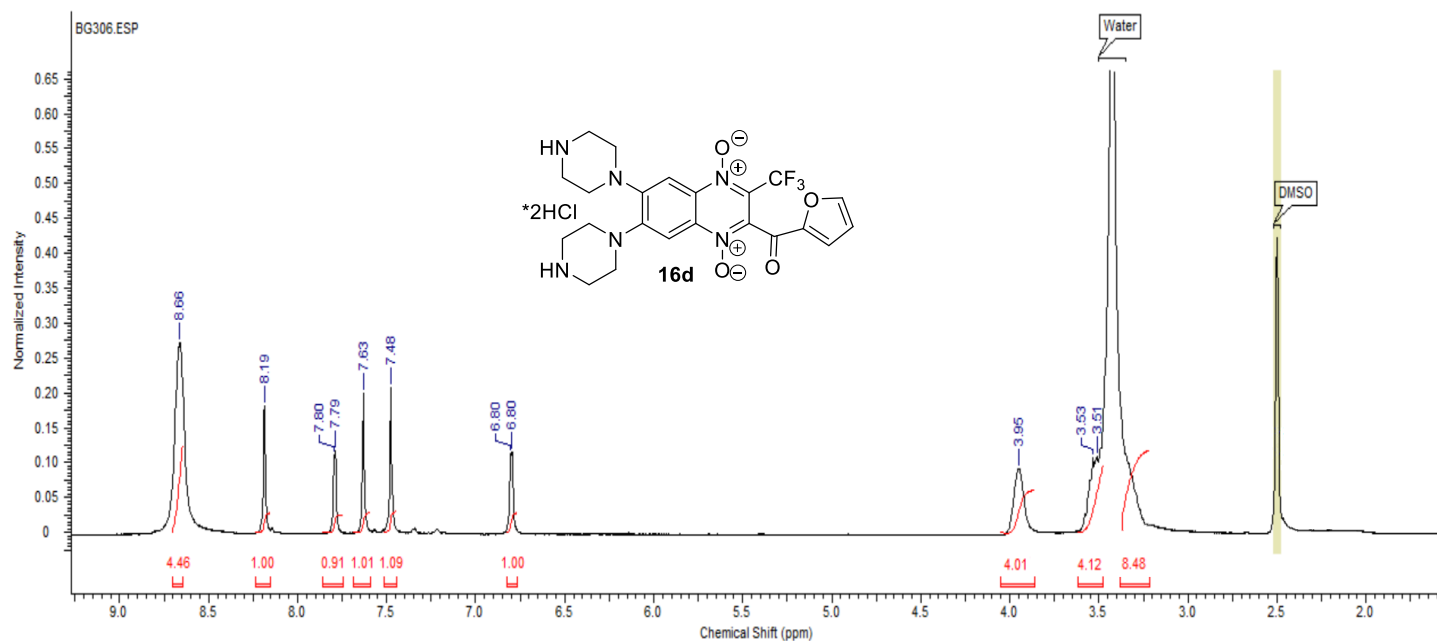

**Figure S38.** Copy of  $^{13}\text{C}$  NMR spectrum of the derivative **16d**.

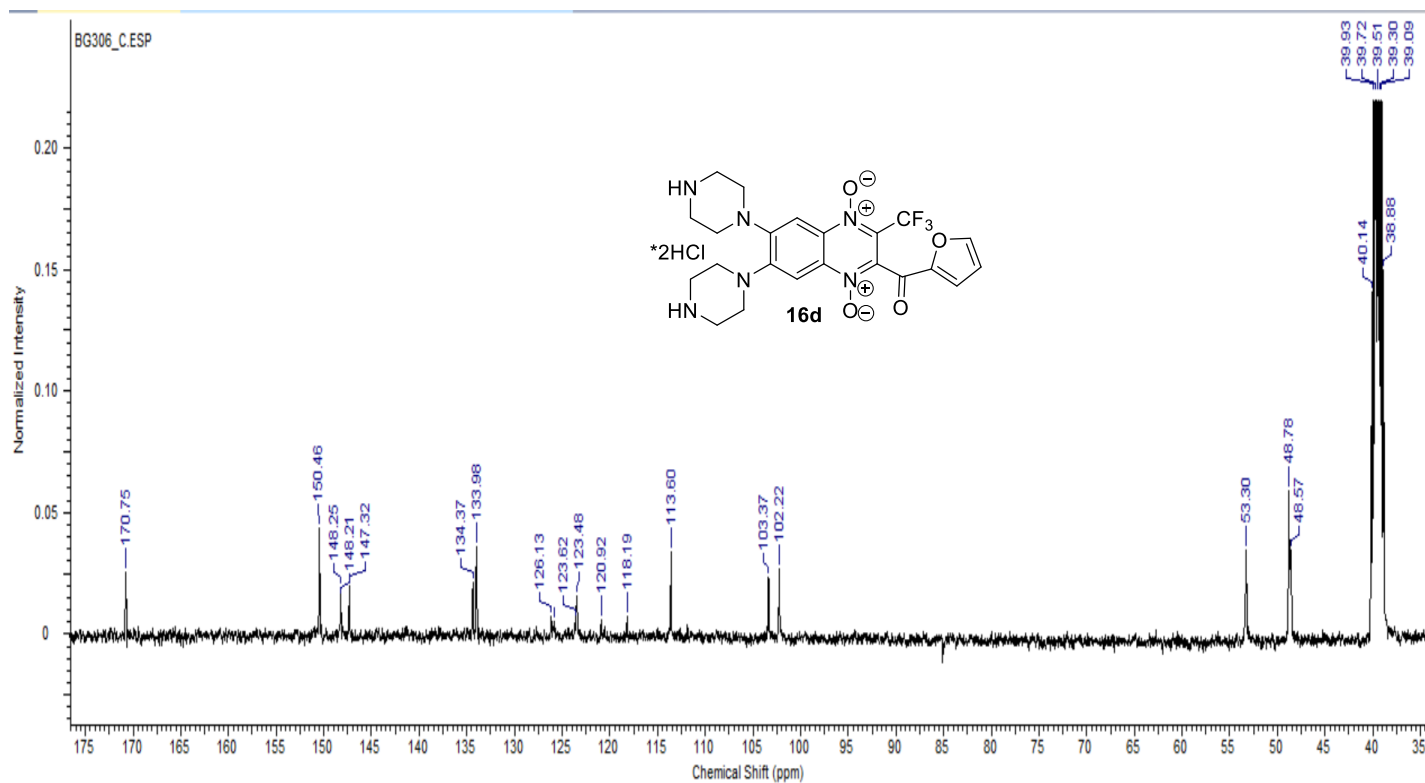

**Figure S39.** Copy of  $^1\text{H}$  NMR spectrum of the derivative **17a**.

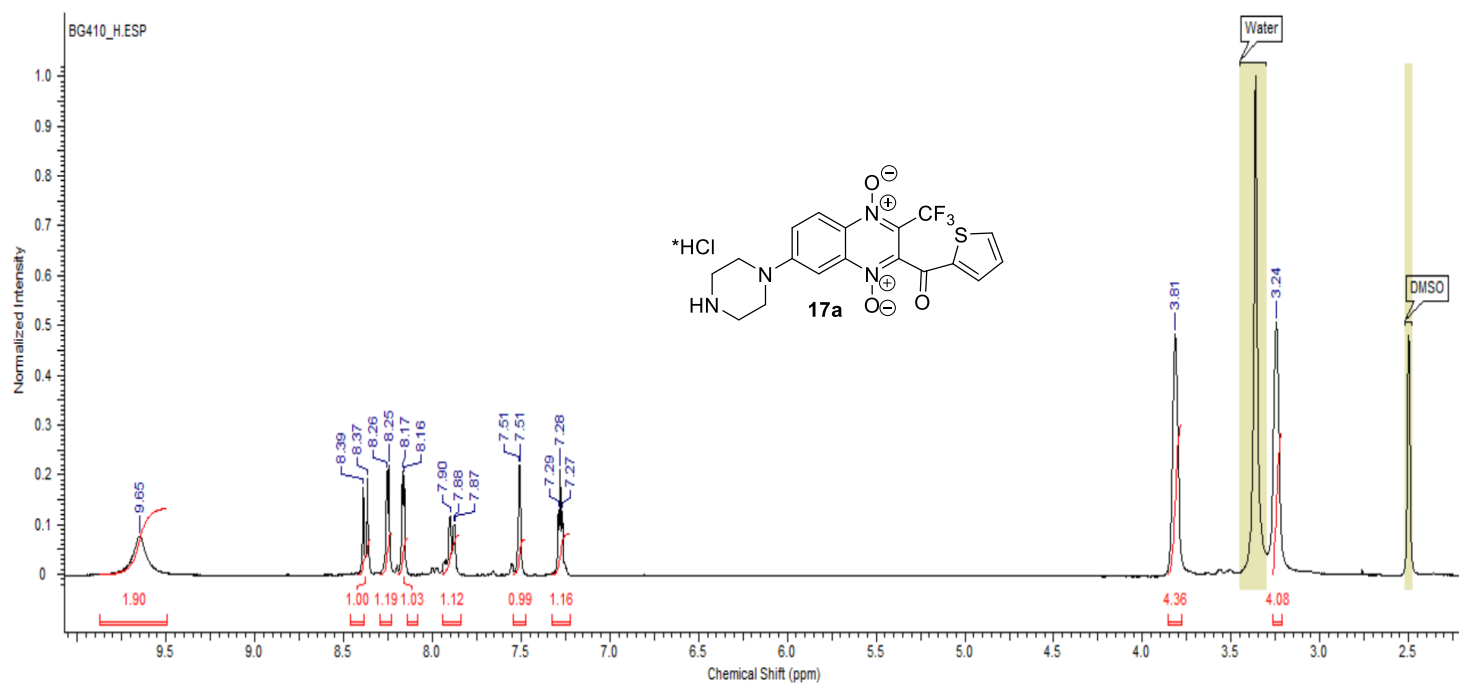

**Figure S40.** Copy of  $^{13}\text{C}$  NMR spectrum of the derivative **17a**.

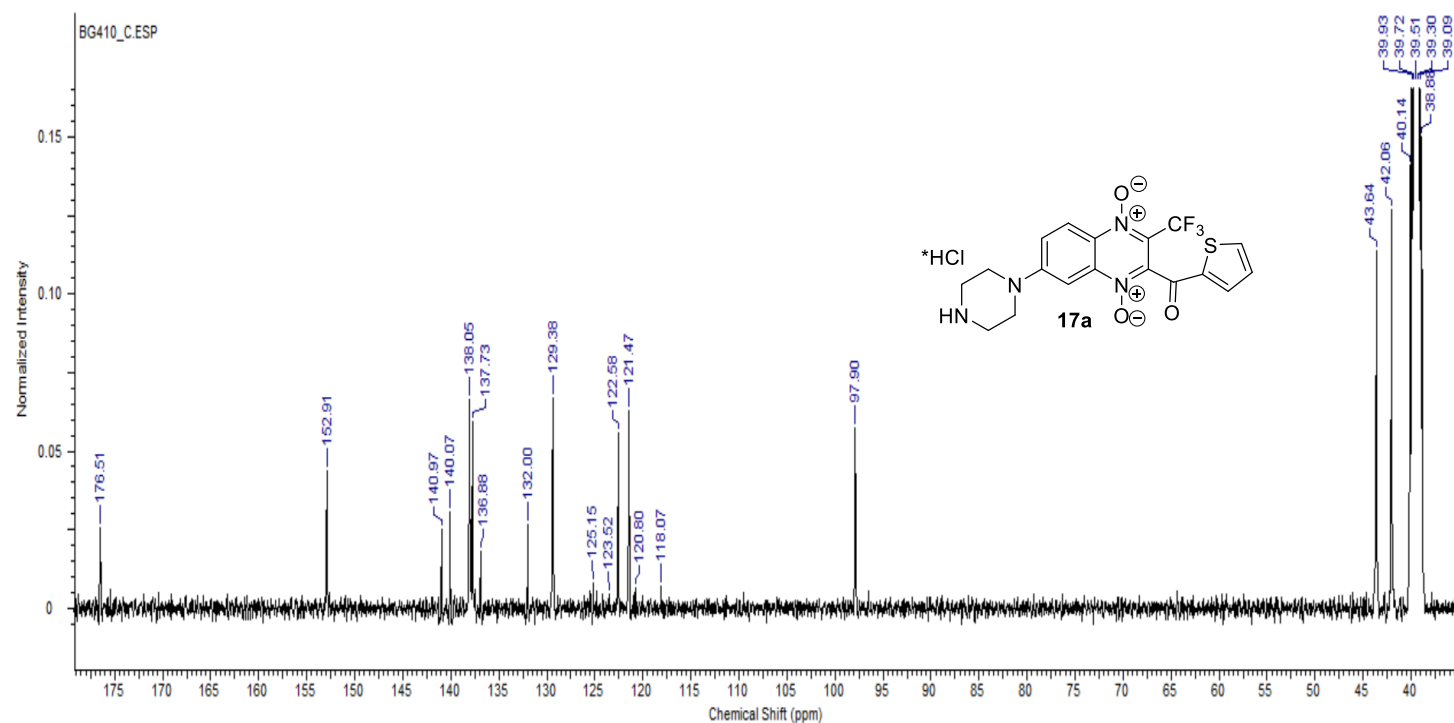

**Figure S41.** Copy of  $^1\text{H}$  NMR spectrum of the derivative **17b**.

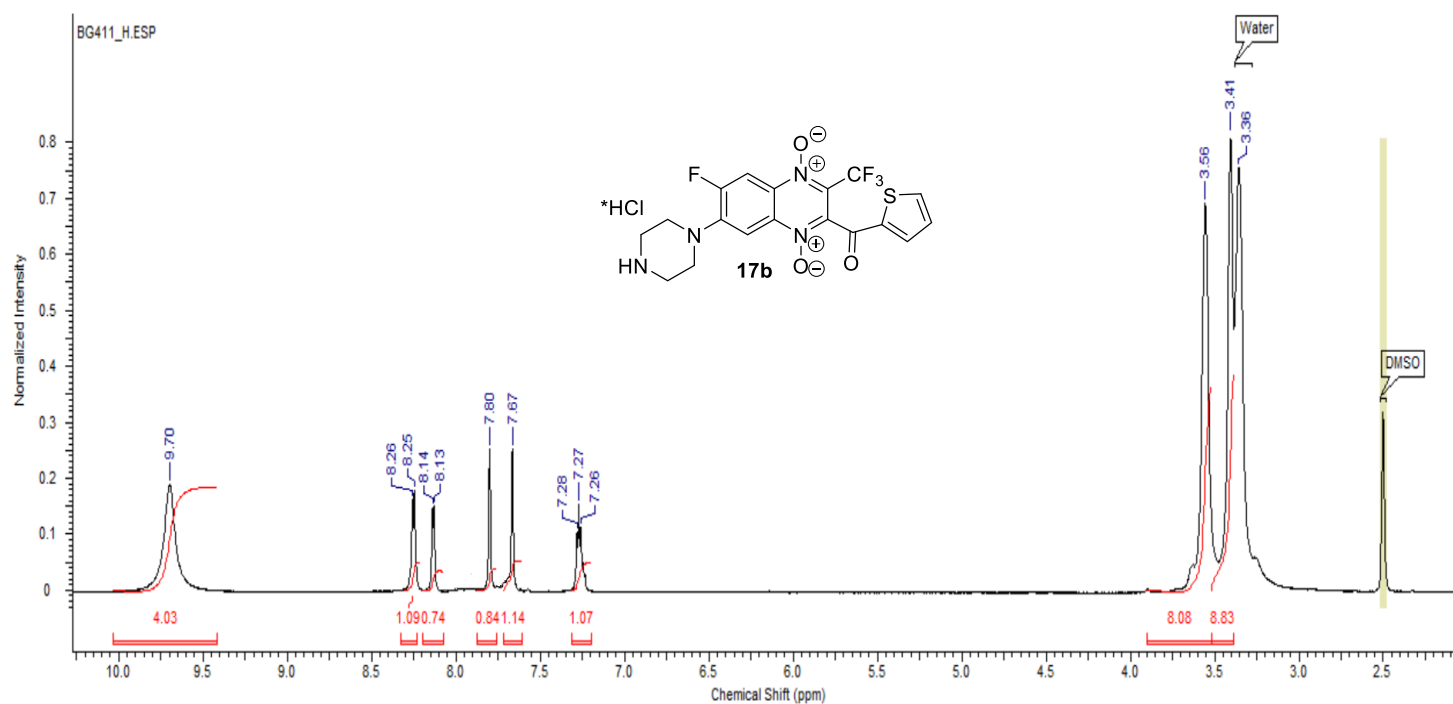

**Figure S42.** Copy of  $^{13}\text{C}$  NMR spectrum of the derivative **17b**.

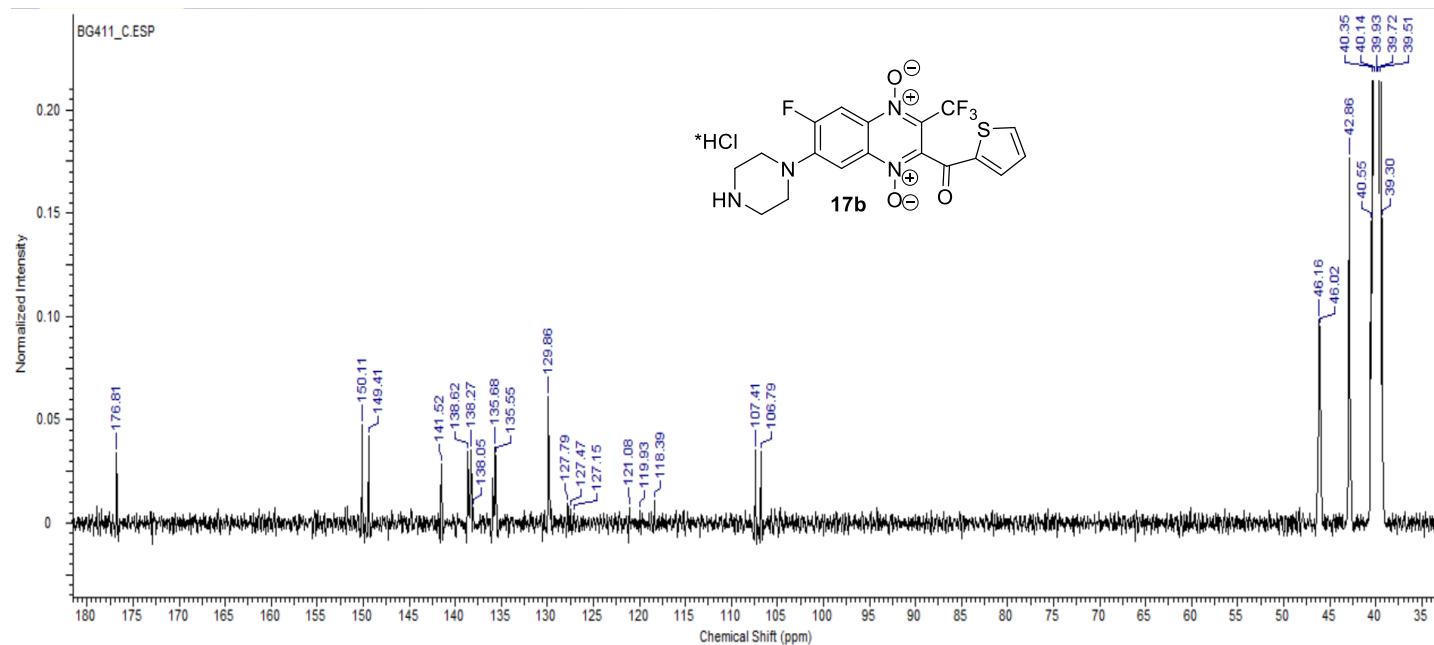

**Figure S43.** Copy of  $^1\text{H}$  NMR spectrum of the derivative **17c**.

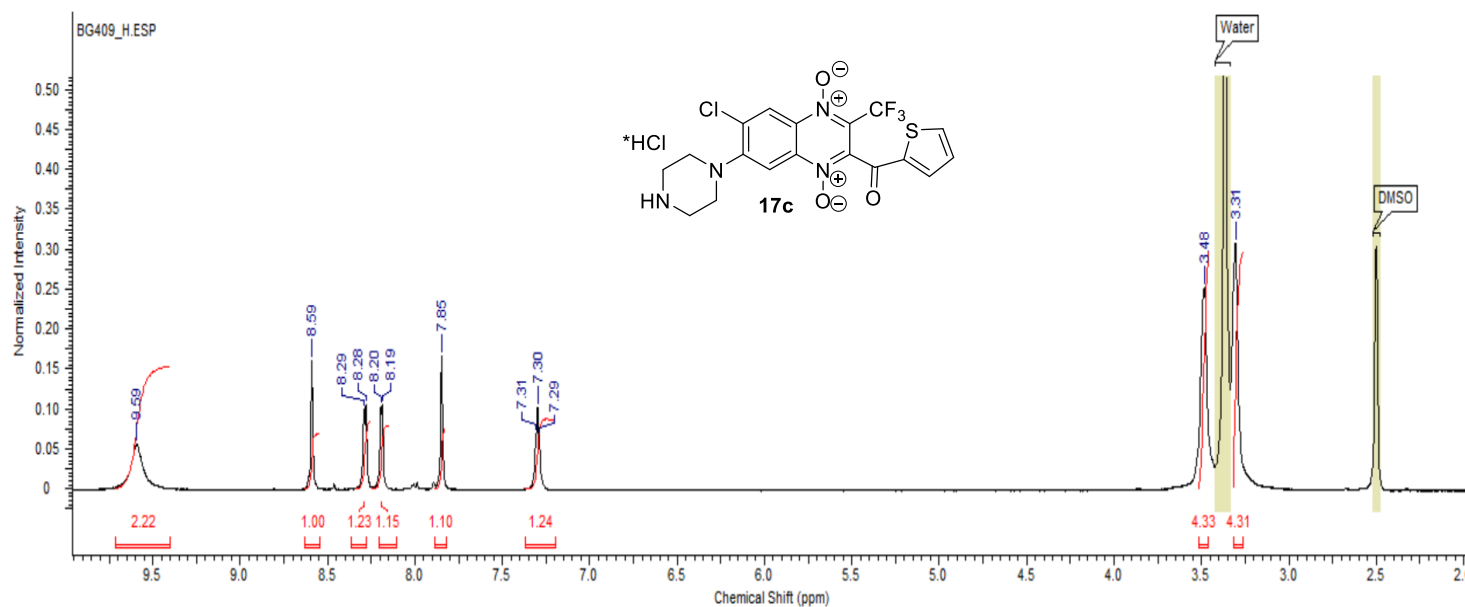

**Figure S44.** Copy of  $^{13}\text{C}$  NMR spectrum of the derivative **17c**.

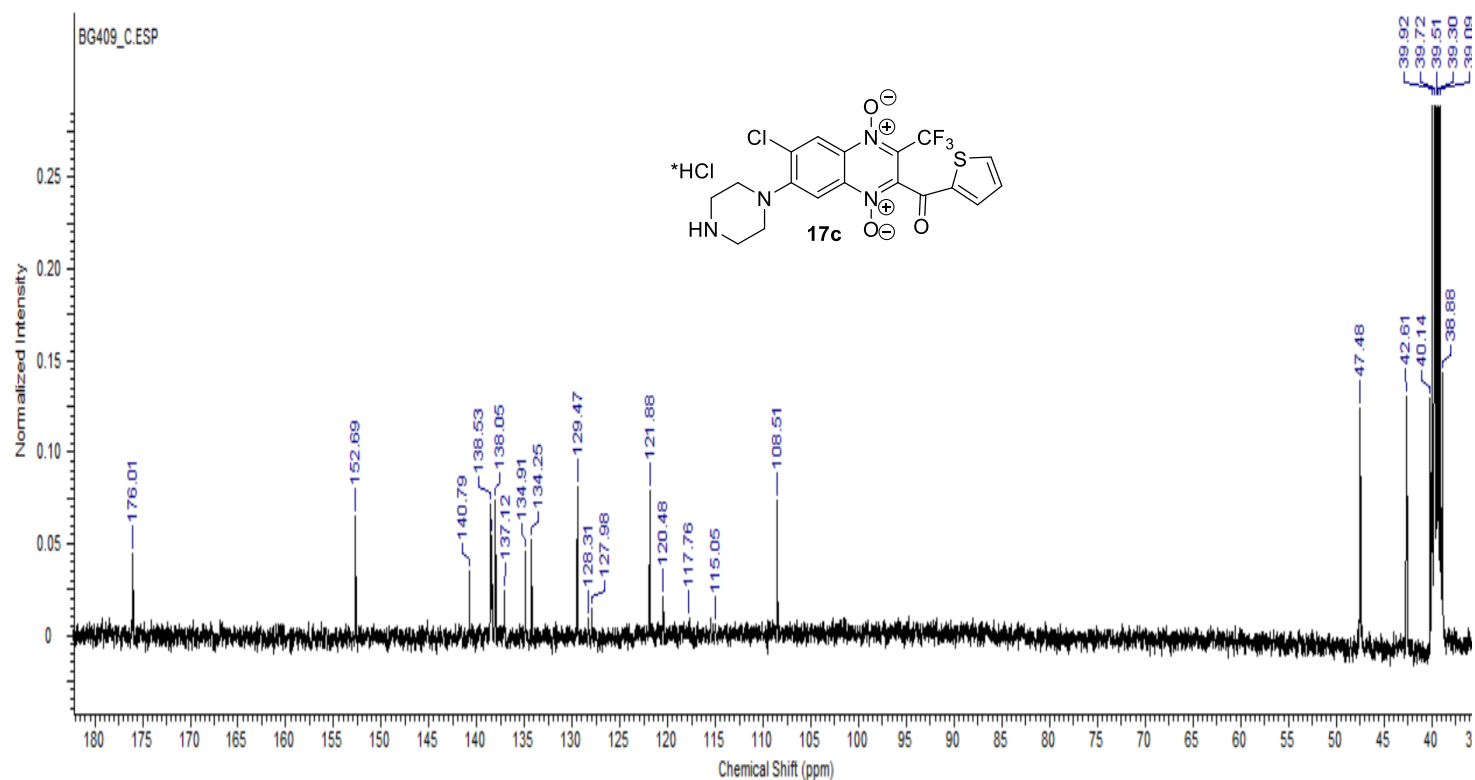



**Figure S45.** Copy of  $^1\text{H}$  NMR spectrum of the derivative **17d**.

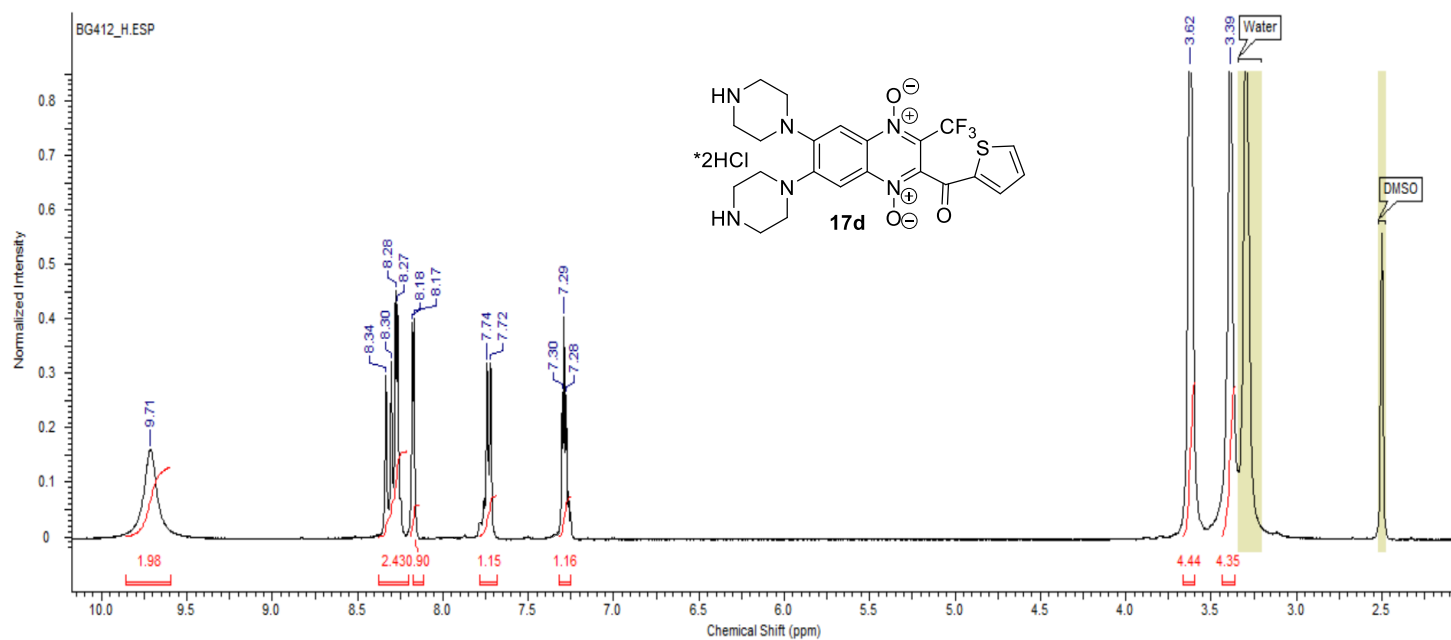

**Figure S46.** Copy of  $^{13}\text{C}$  NMR spectrum of the derivative **17d**.

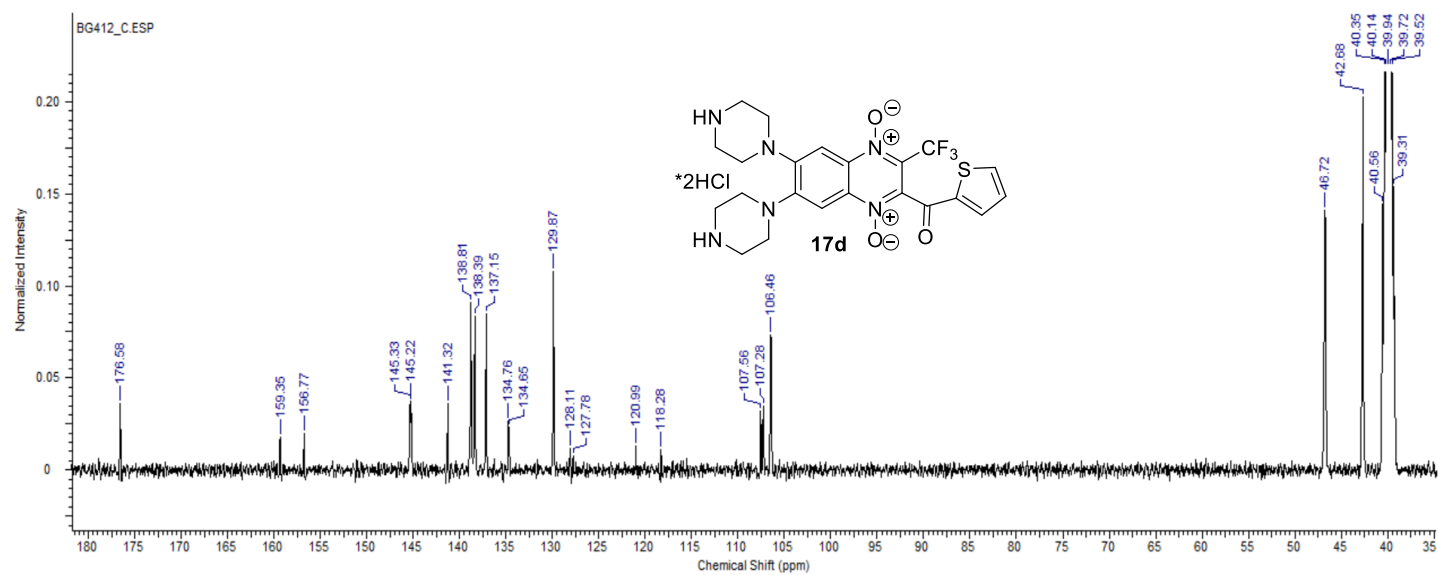

Figure S47. Copy of  $^1\text{H}$  NMR spectrum of the derivative **18a**.

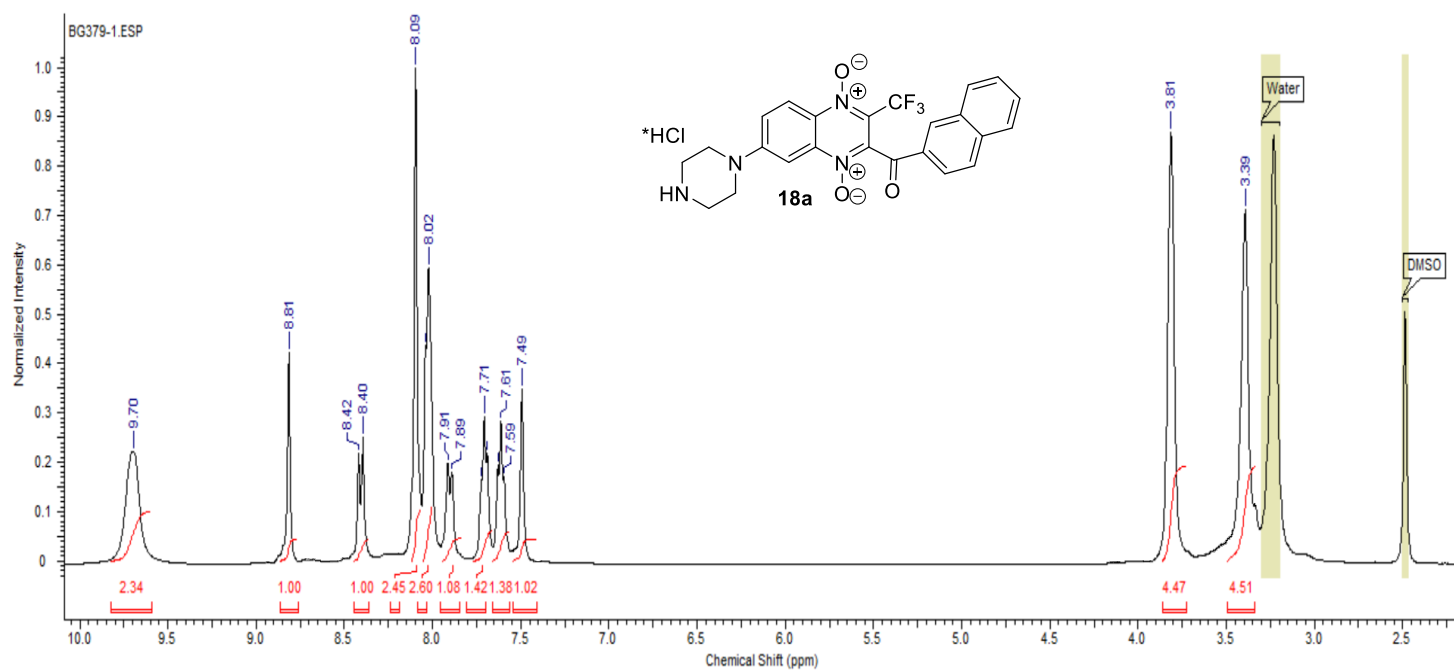

Figure S48. Copy of  $^{13}\text{C}$  NMR spectrum of the derivative **18a**.

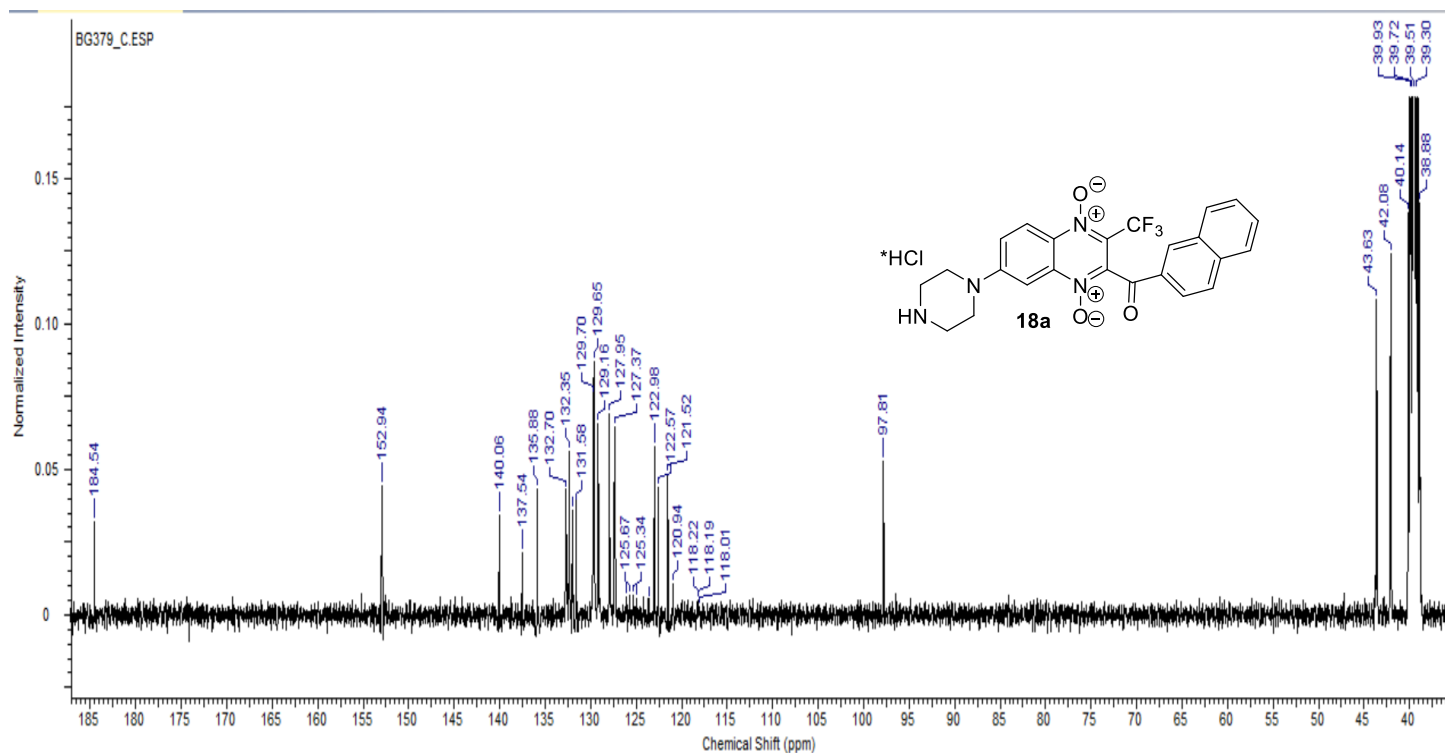

**Figure S49.** Copy of  $^1\text{H}$  NMR spectrum of the derivative **18b**.

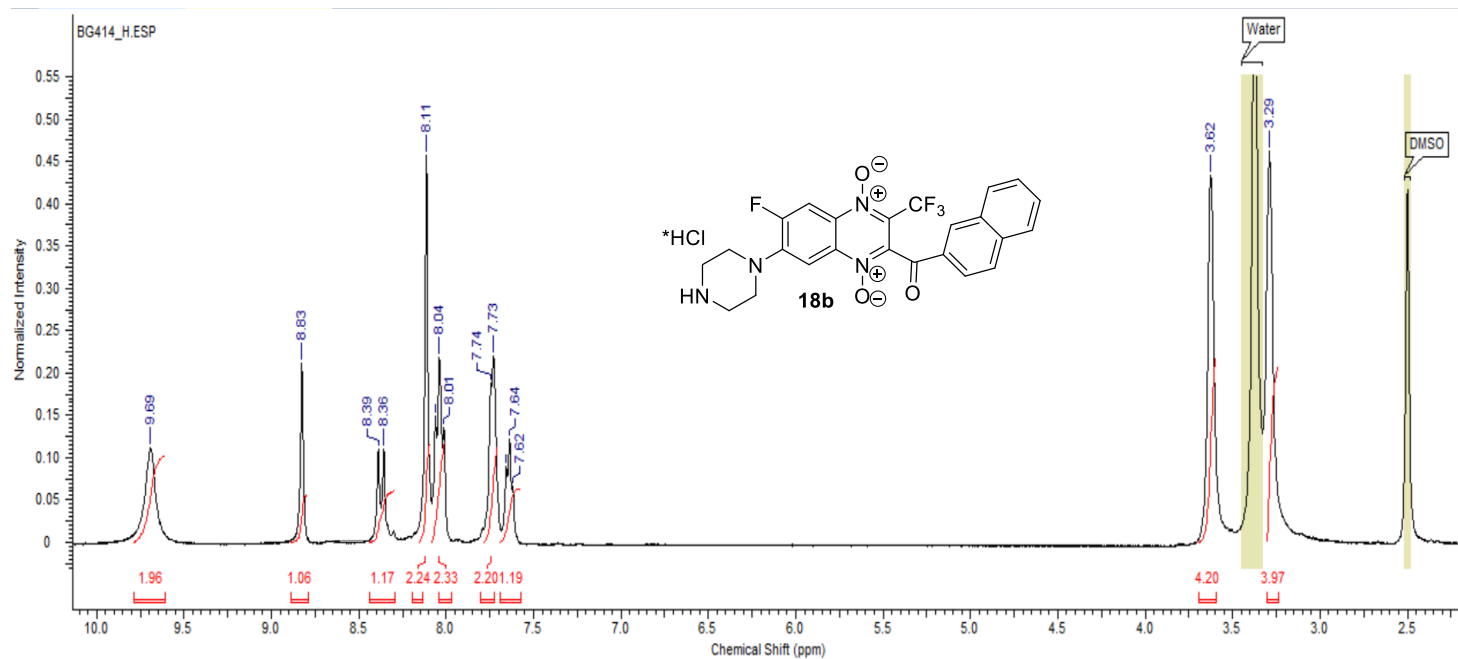

**Figure S50.** Copy of  $^{13}\text{C}$  NMR spectrum of the derivative **18b**.

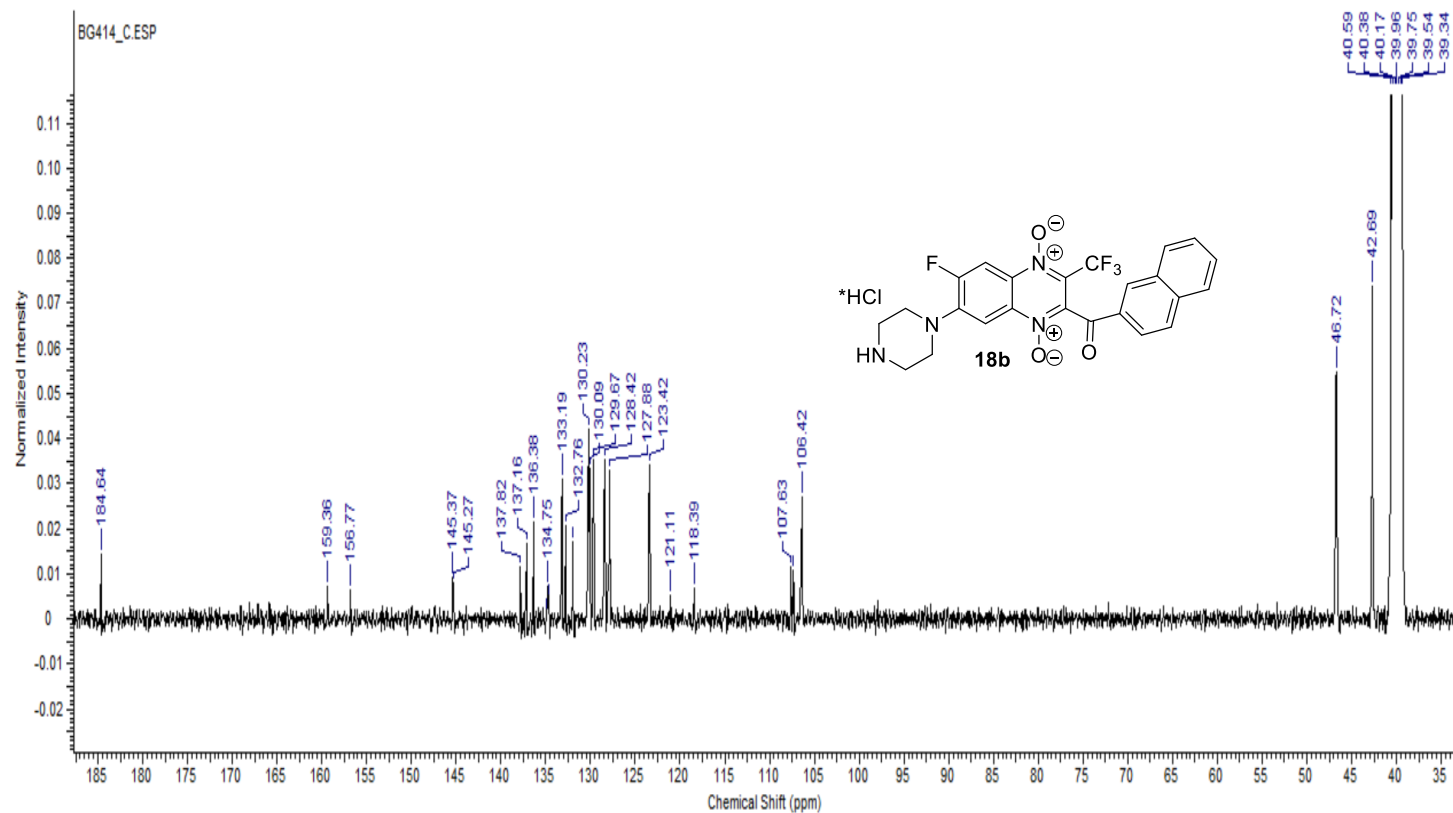

**Figure S51.** Copy of  $^1\text{H}$  NMR spectrum of the derivative **18c**.

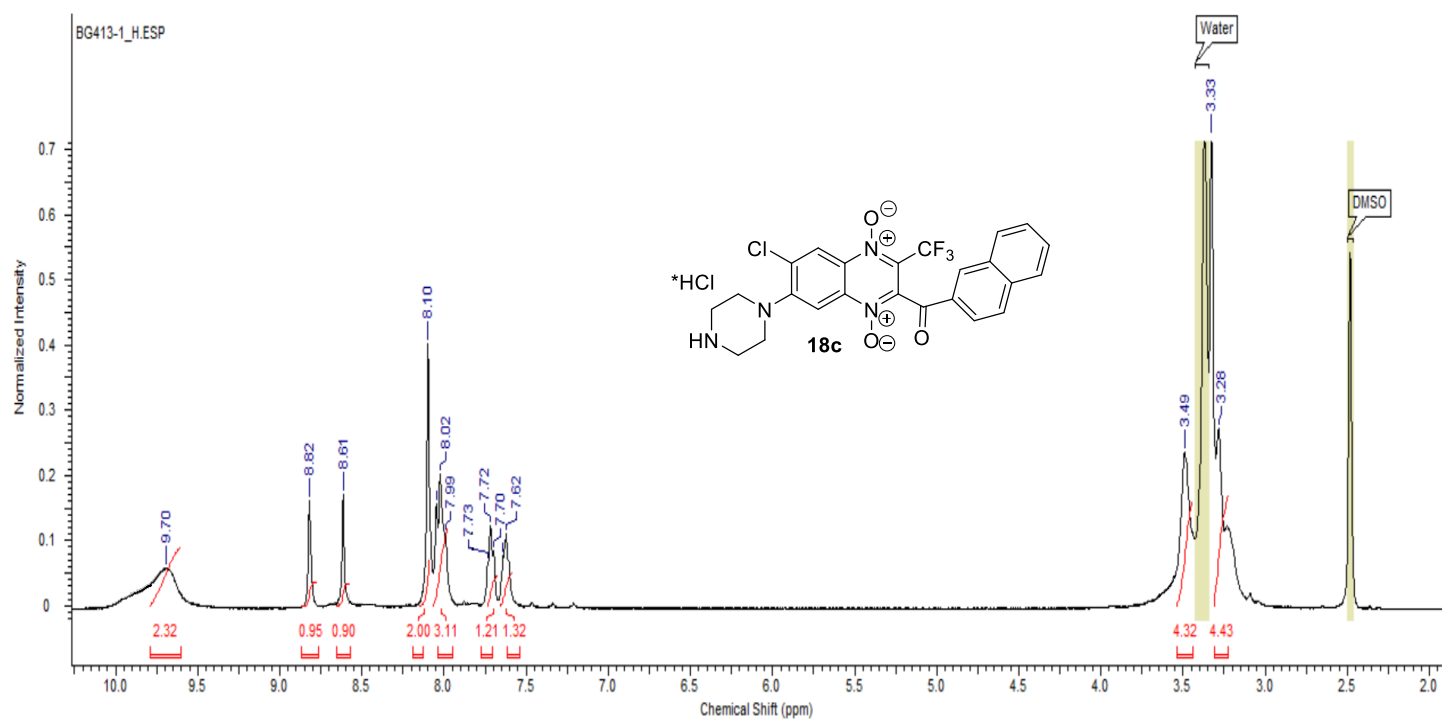

**Figure S52.** Copy of  $^{13}\text{C}$  NMR spectrum of the derivative **18c**.

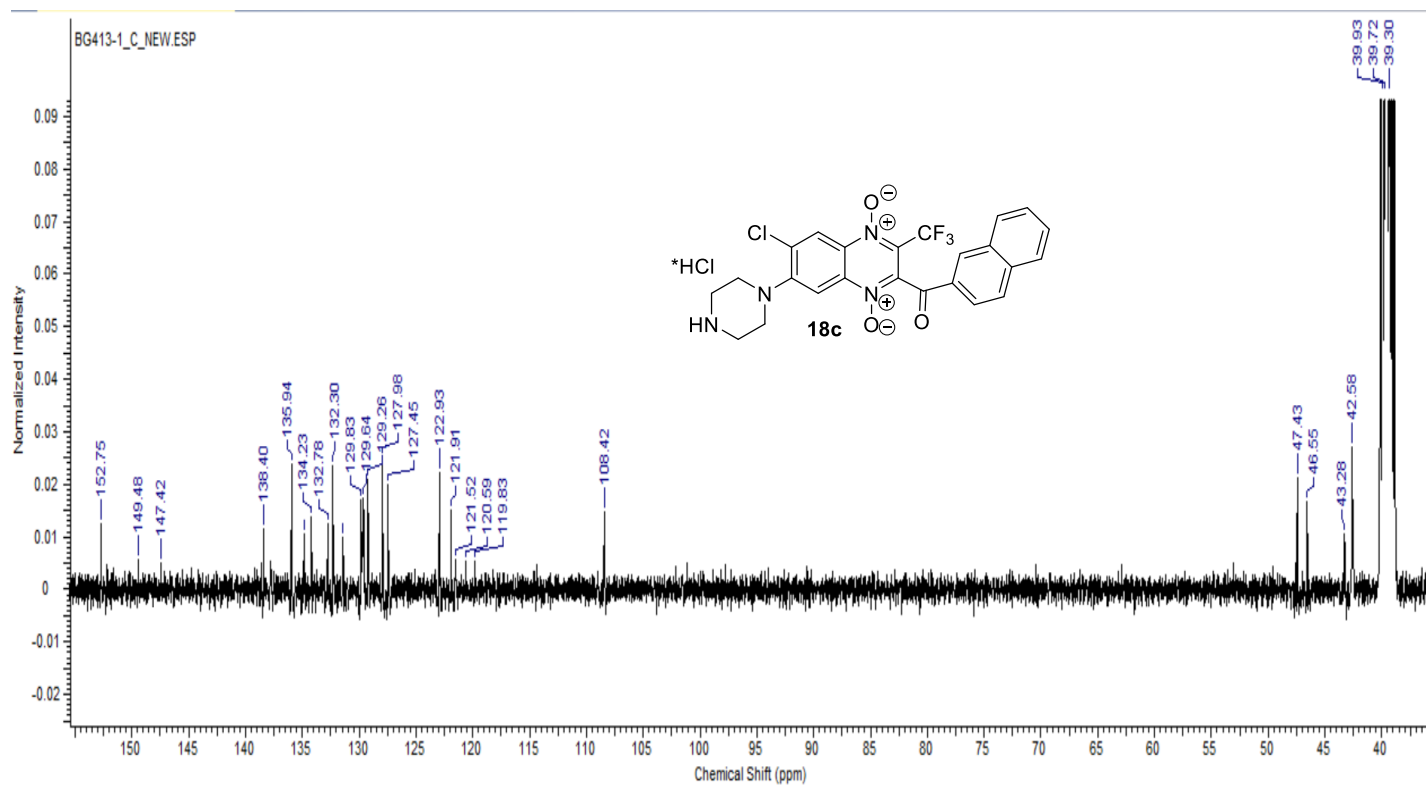

**Figure S53.** Copy of  $^1\text{H}$  NMR spectrum of the derivative **18d**.

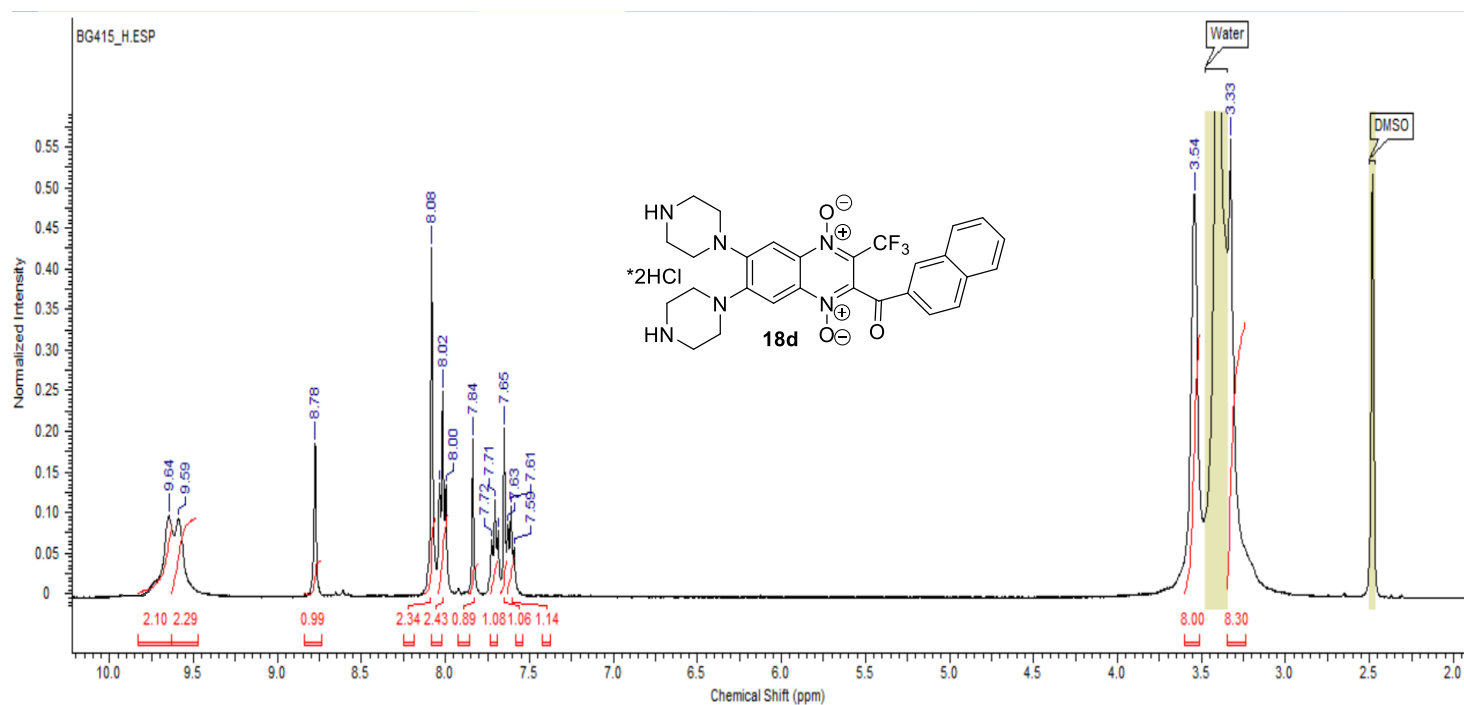

**Figure S54.** Copy of  $^{13}\text{C}$  NMR spectrum of the derivative **18d**.

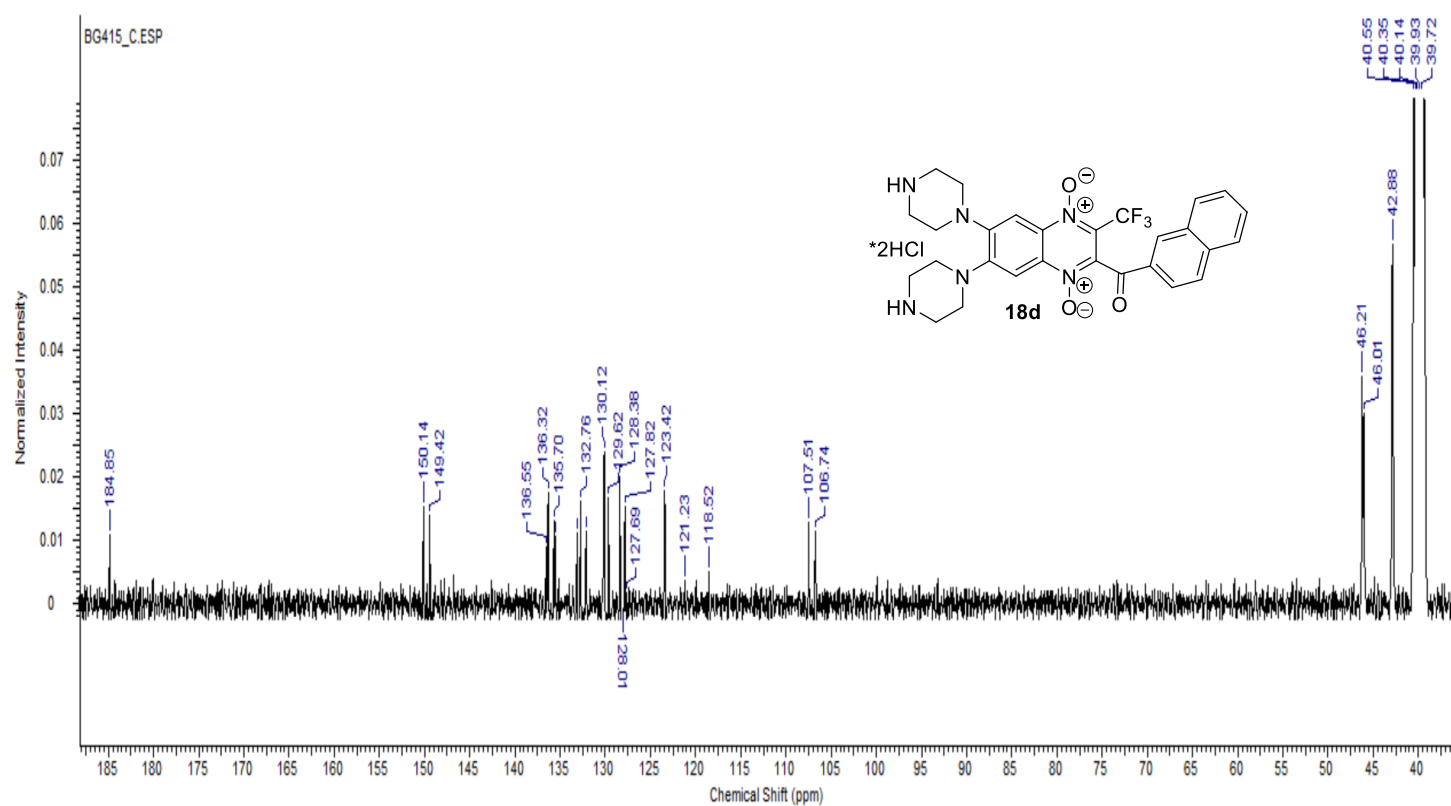

**Figure S55.** Copy of  $^1\text{H}$  NMR spectrum of the derivative **7d**.

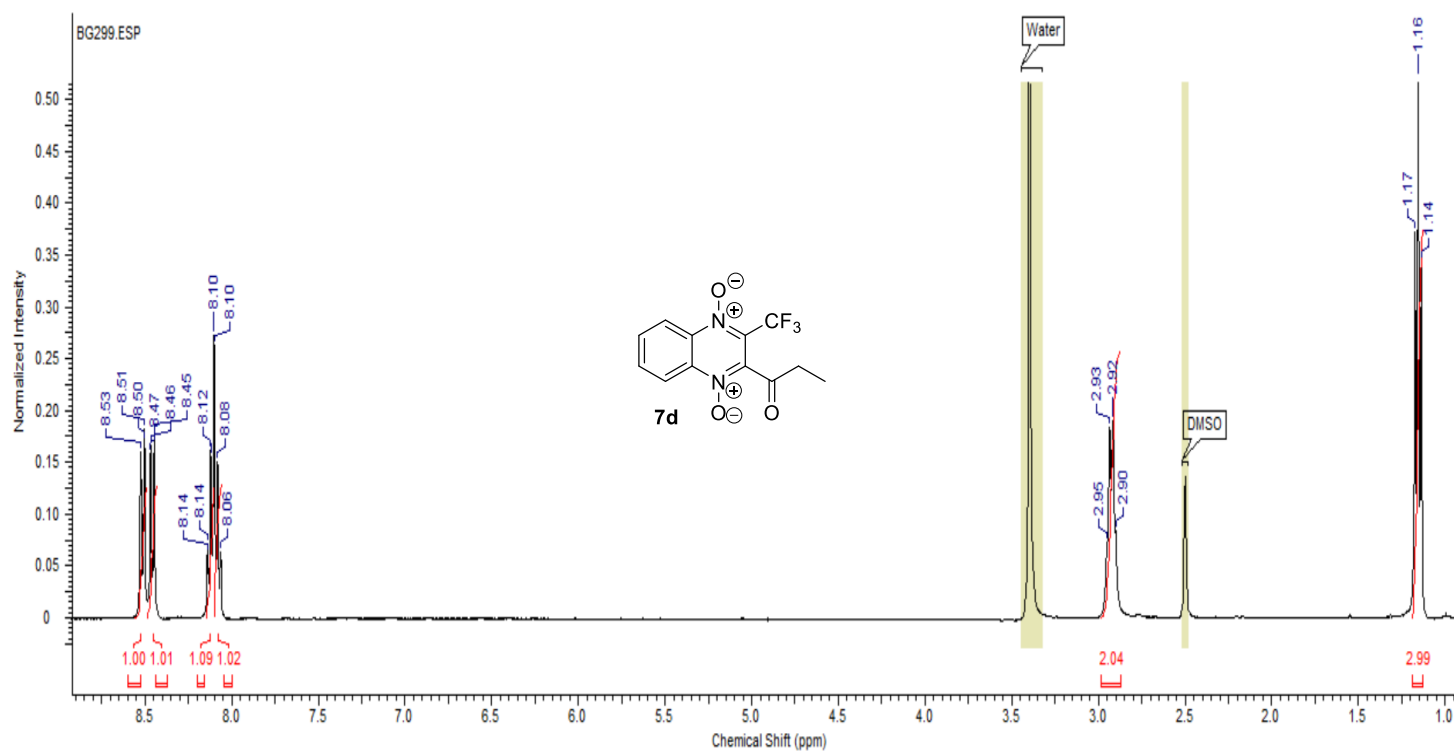

**Figure S56.** Copy of  $^{13}\text{C}$  NMR spectrum of the derivative **7d**.

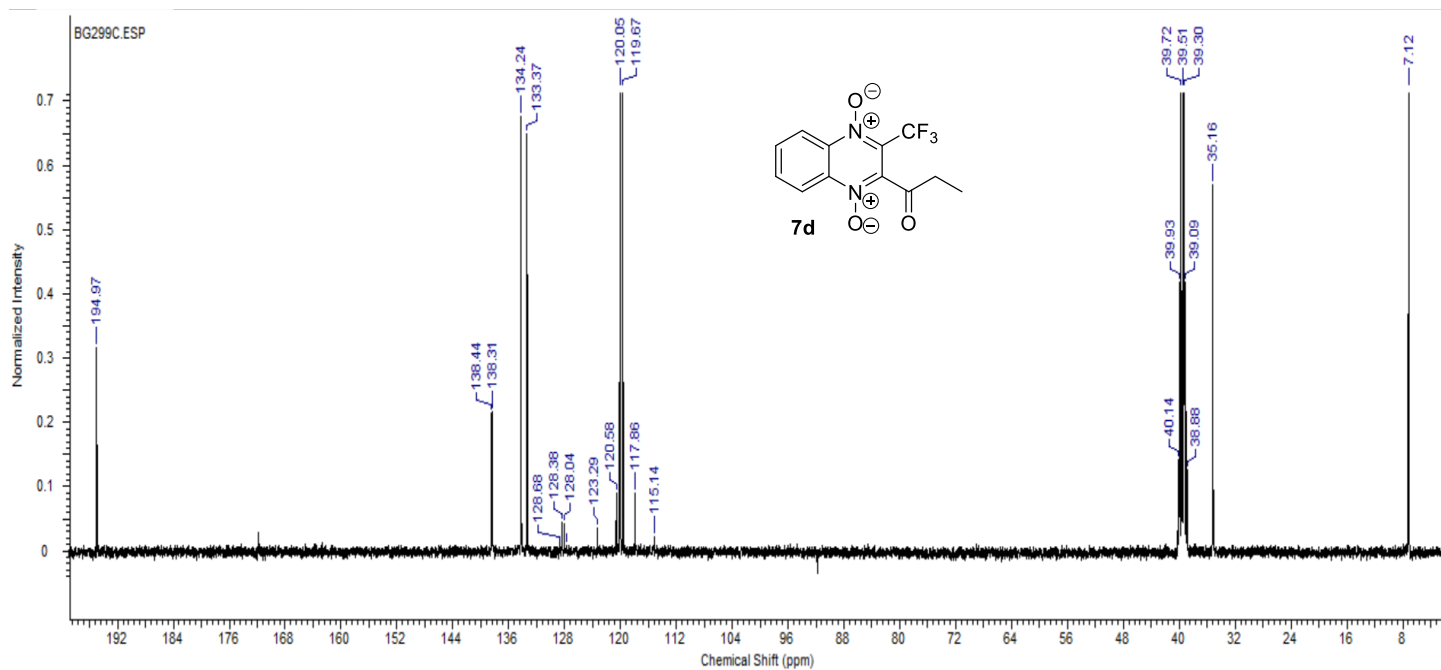

**Table S1.**  $^{13}\text{C}$  chemical shifts ( $\delta_{\text{C}}$ , ppm) and characteristic increments ( $I^{\text{C}}$ ) for the  $^{13}\text{C}$  chemical shift differences (relative to 2-propionyl-3-trifluoromethylquinoxaline 1,4-dioxide (**7d**)) for the piperazine group for **14a–c**.

| Position | 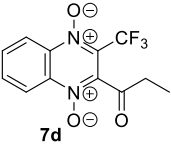 |  |                |  |                |  |                |
|----------|-----------------------------------------------------------------------------------|-----------------------------------------------------------------------------------|----------------|------------------------------------------------------------------------------------|----------------|-------------------------------------------------------------------------------------|----------------|
|          | $\delta_{\text{C}}$                                                               | $\delta_{\text{C}}$                                                               | $I^{\text{C}}$ | $\delta_{\text{C}} (J, \Gamma_{\text{H}})$                                         | $I^{\text{C}}$ | $\delta_{\text{C}}$                                                                 | $I^{\text{C}}$ |
| C-2      | 138.44                                                                            | 138.7                                                                             | +0.3           | 136.2                                                                              | −2.2           | 138.0                                                                               | +0.3           |
| C-3      | 128.2                                                                             | 124.4                                                                             | −3.8           | 126.5                                                                              | −1.7           | 127.3                                                                               | −3.8           |
| C-9      | 138.41                                                                            | 139.6                                                                             | +1.2           | 138.4                                                                              | −0.03          | 138.9                                                                               | +1.2           |
| C-10     | 138.3                                                                             | 131.4                                                                             | −6.9           | 133.5 (11.5)                                                                       | −4.8           | 134.3                                                                               | −6.9           |

# Copies of 2D NMR Spectra

**Figure S57.**  $^1\text{H}$ - $^{13}\text{C}$  HSQC spectrum for compound **13b**.

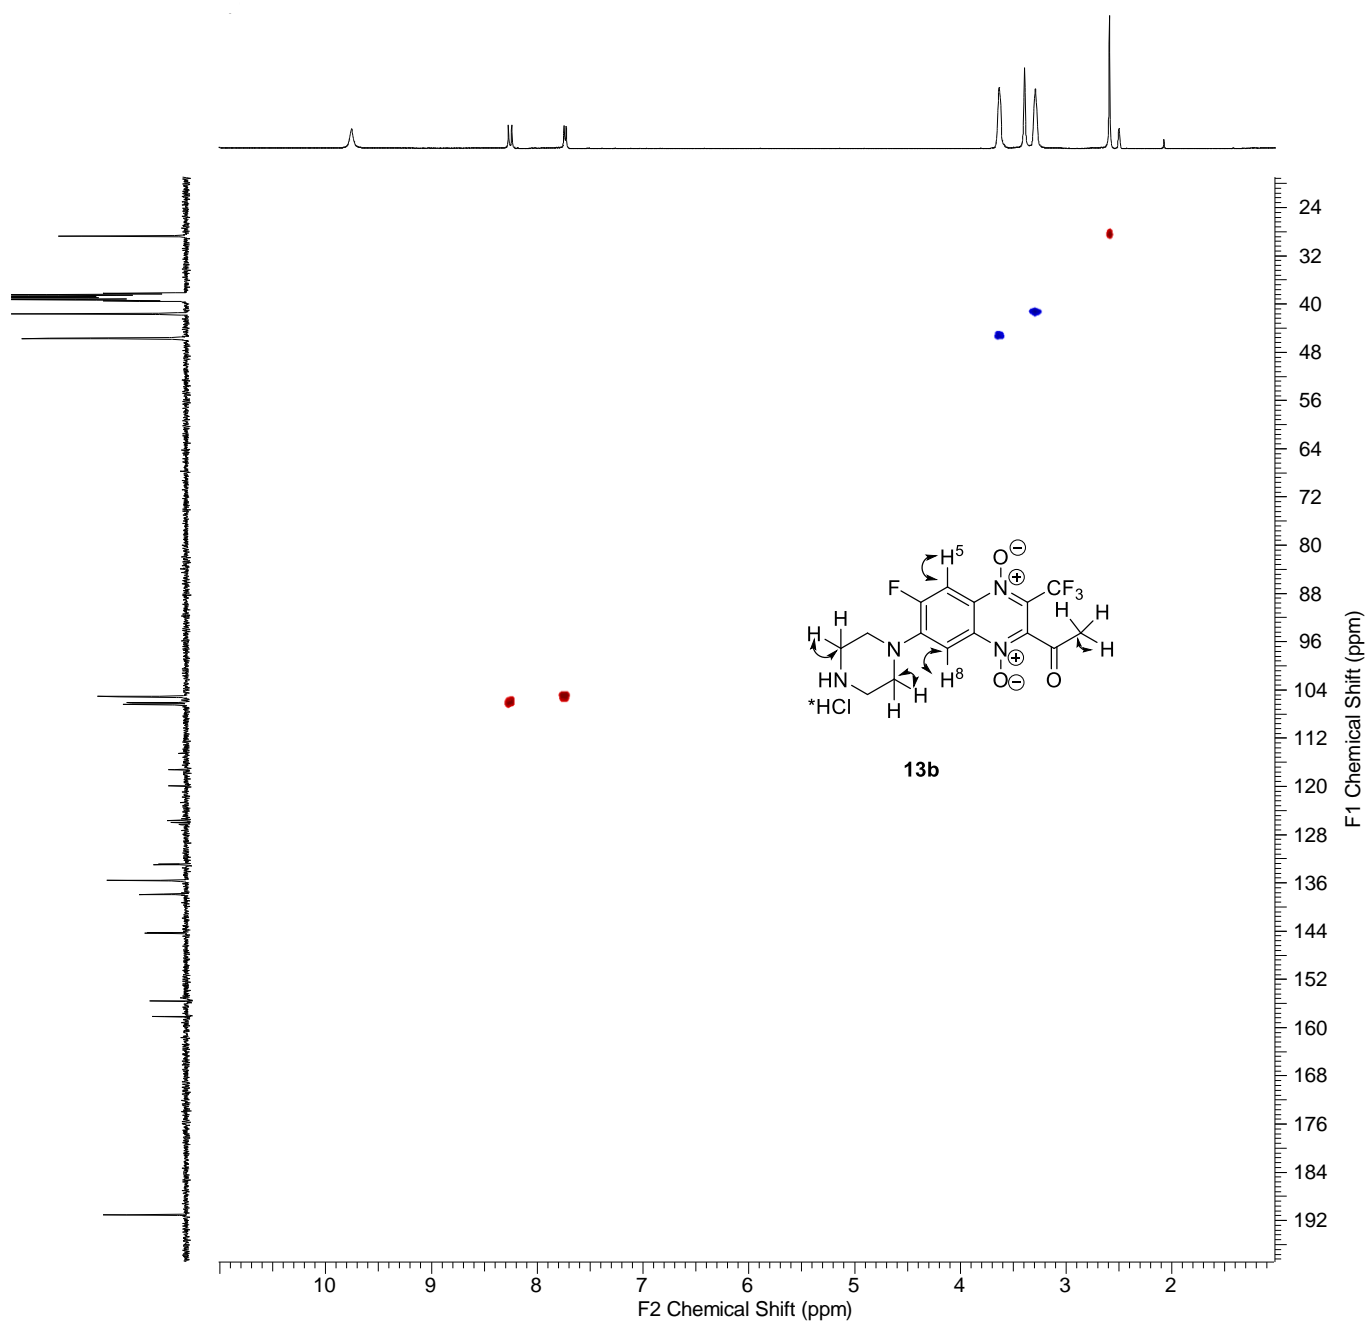



**Figure S58.**  $^1\text{H}$ - $^{13}\text{C}$  CIGAR-HMBC spectrum for compound **13b**.

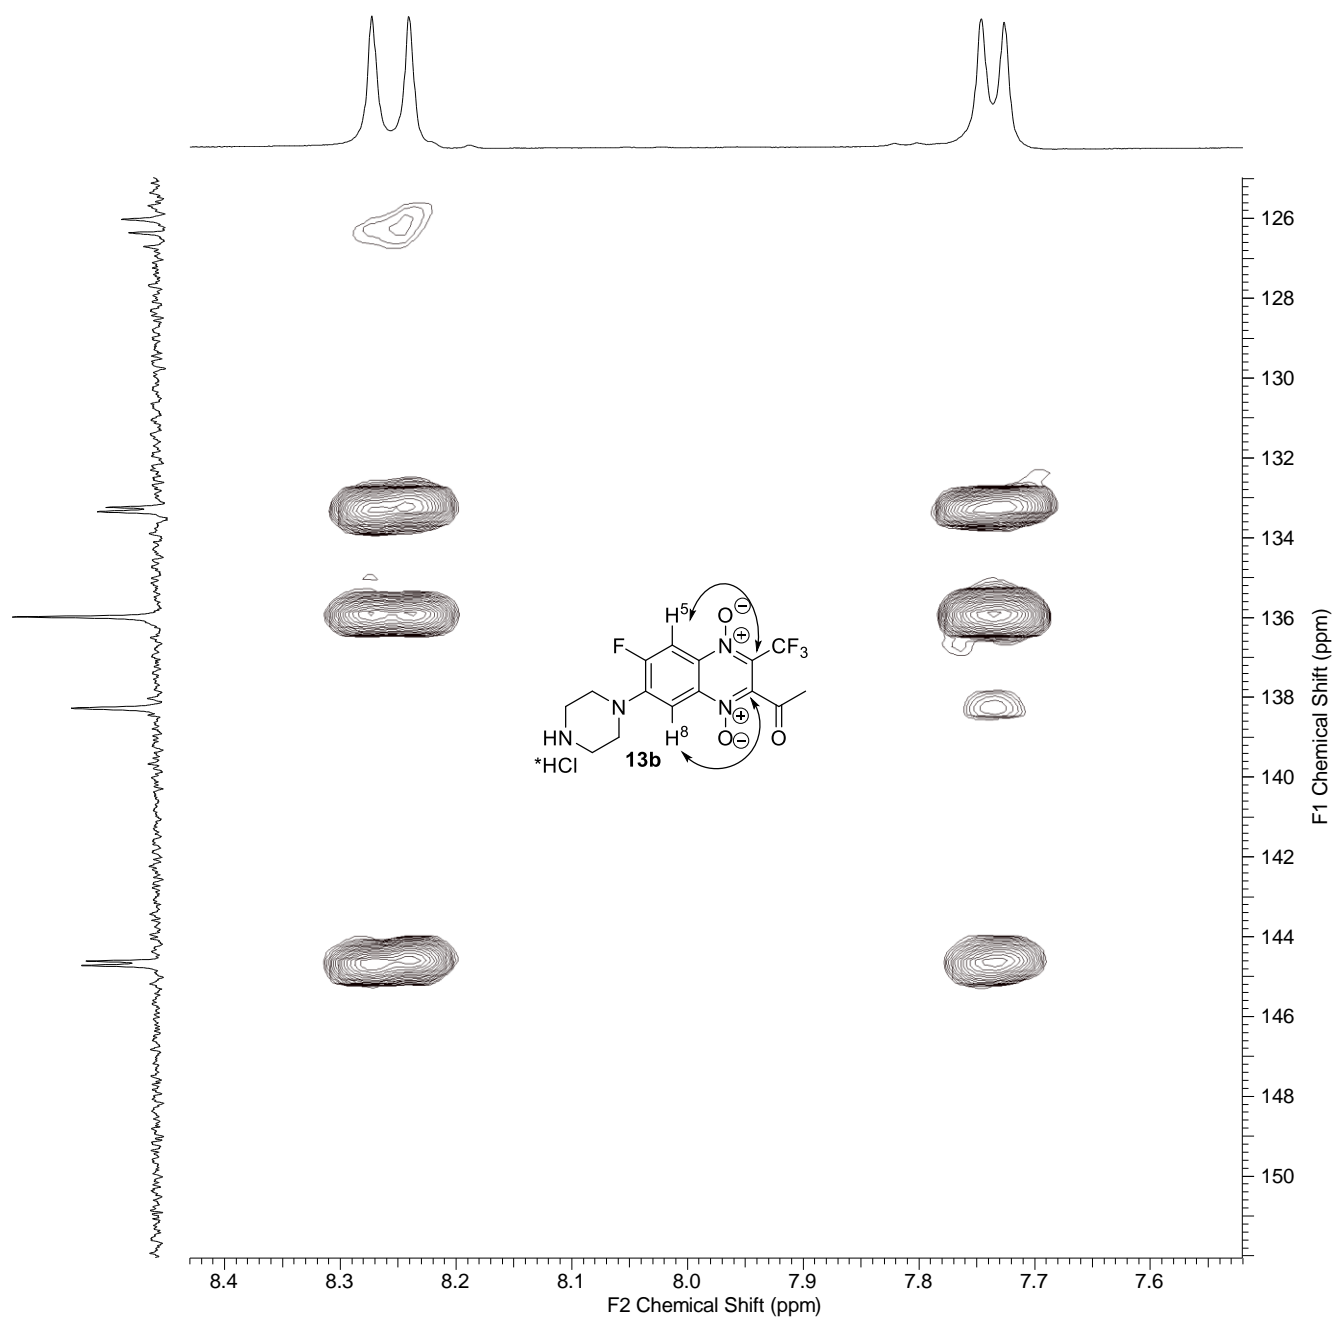

**Figure S59.**  $^1\text{H}$ - $^{13}\text{C}$  HSQC spectrum for compound **13c**.

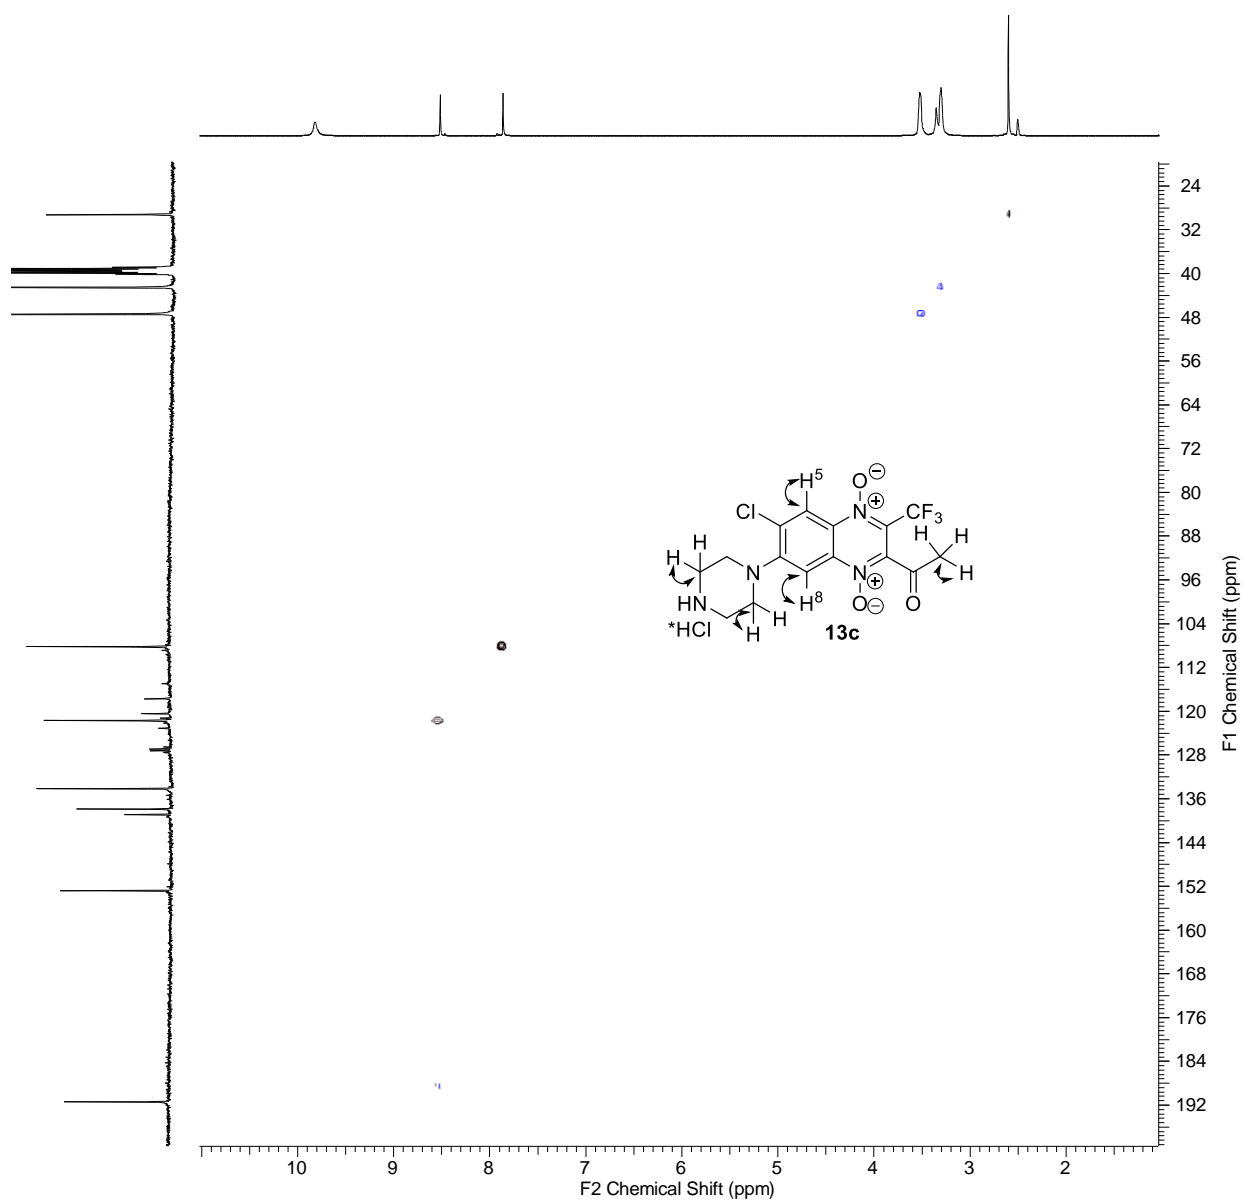

**Figure S60.**  $^1\text{H}$ - $^{13}\text{C}$  CIGAR-HMBC spectrum for compound **13c**.

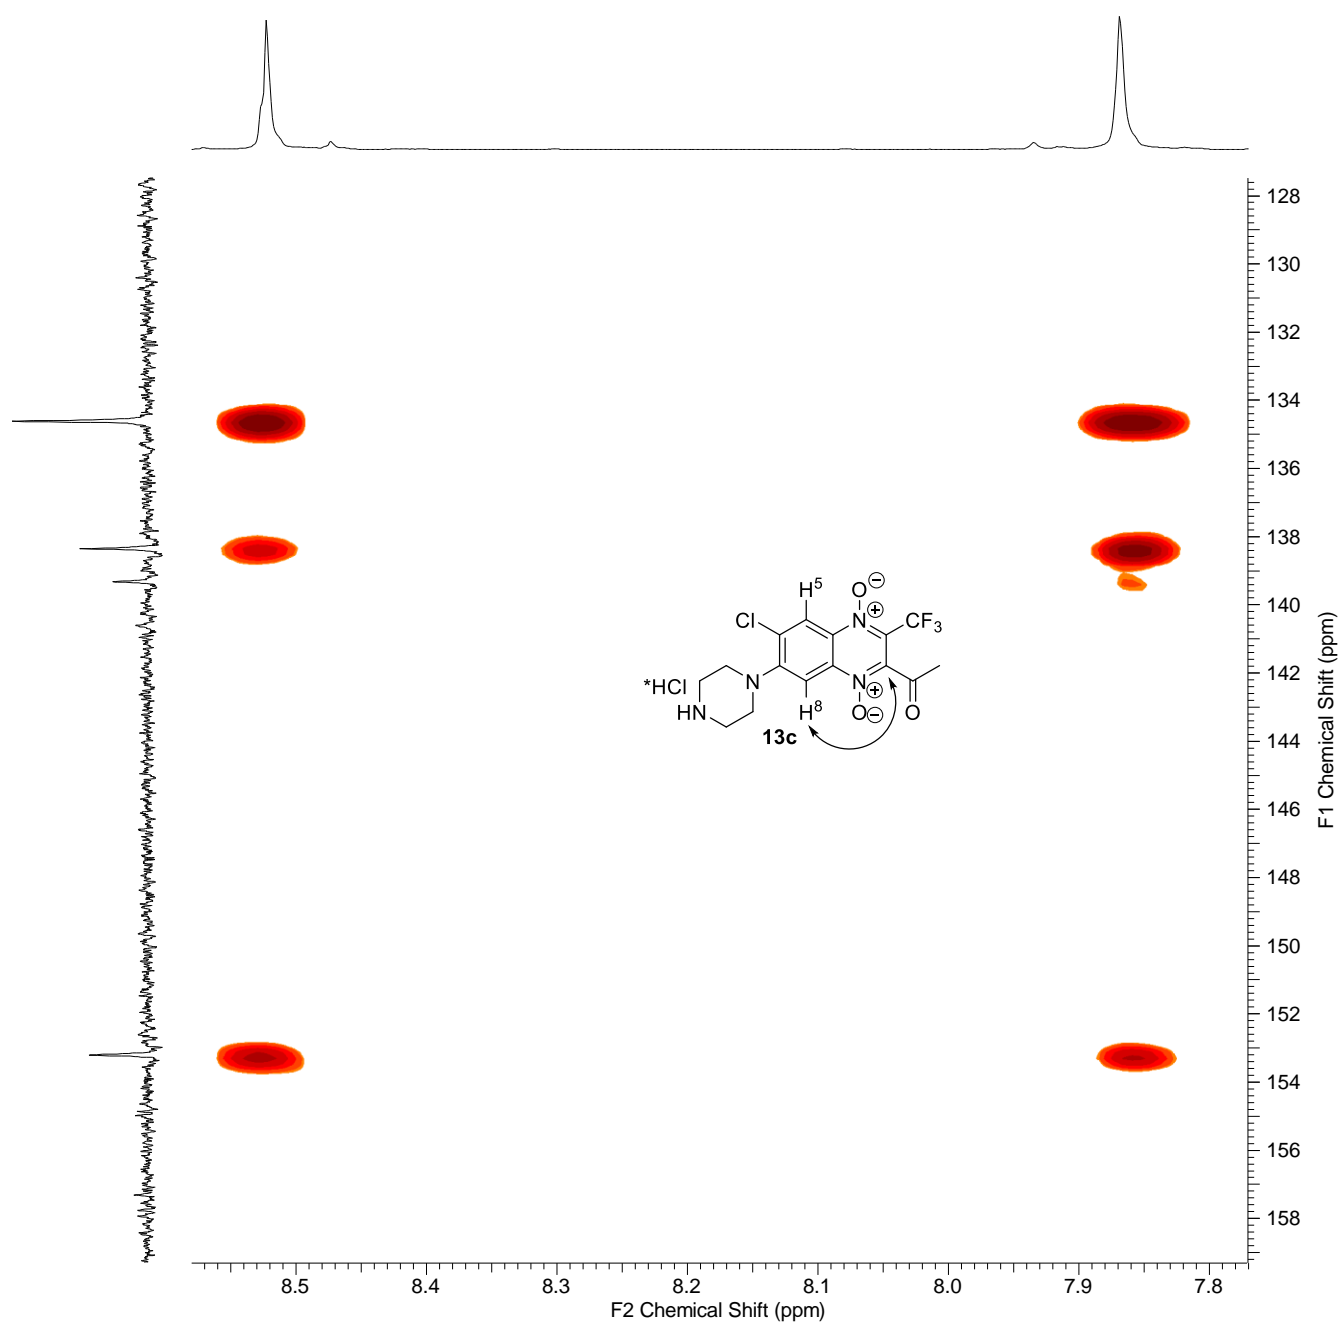

# Copies of HRMS ESI Analysis

**Figure S61.** Copy of HRMS ESI analysis of the derivatives **6a**.

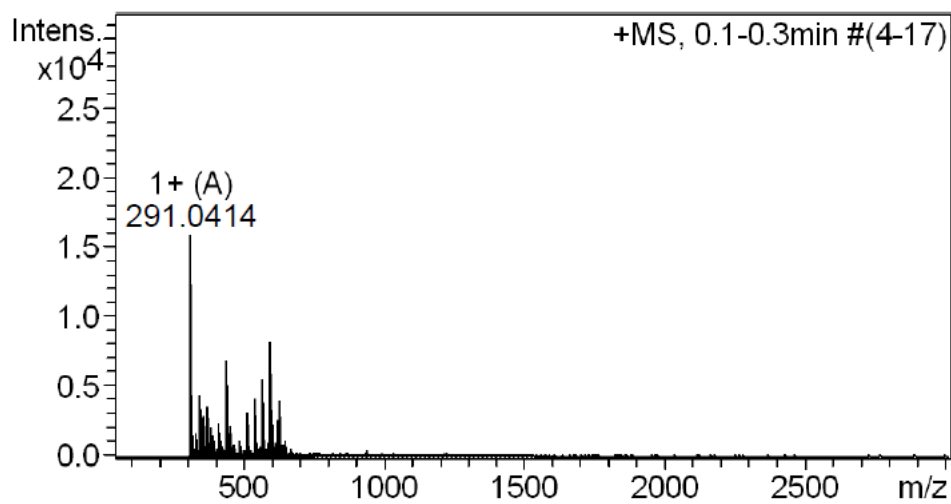

| # | m/z      | Res. | S/N   | I     | I %   |
|---|----------|------|-------|-------|-------|
| 1 | 291.0414 | 8243 | 542.6 | 15860 | 100.0 |
| 2 | 344.3170 | 7188 | 126.6 | 4345  | 27.4  |
| 3 | 372.3455 | 7659 | 89.6  | 3495  | 22.0  |
| 4 | 437.1918 | 7576 | 138.0 | 6878  | 43.4  |
| 5 | 540.5333 | 7924 | 60.9  | 4077  | 25.7  |
| 6 | 568.5627 | 9071 | 81.4  | 5428  | 34.2  |
| 7 | 596.5946 | 9277 | 123.5 | 8192  | 51.7  |
| 8 | 597.5950 | 8224 | 49.3  | 3289  | 20.7  |
| 9 | 624.6259 | 8501 | 60.5  | 4018  | 25.3  |

**Figure S62.** Copy of HRMS ESI analysis of the derivatives **7a**.

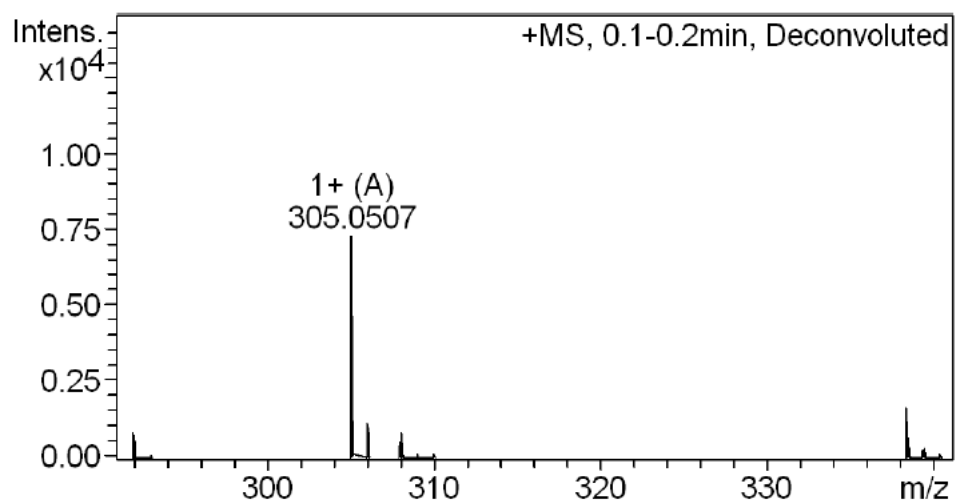

| # | m/z      | Res. | S/N | I    | I %   |
|---|----------|------|-----|------|-------|
| 1 | 292.0451 |      |     | 841  | 11.6  |
| 2 | 305.0507 |      |     | 7273 | 100.0 |
| 3 | 308.0185 |      |     | 969  | 13.3  |
| 4 | 338.3345 |      |     | 1727 | 23.7  |

**Figure S63.** Copy of HRMS ESI analysis of the derivatives **12a**.

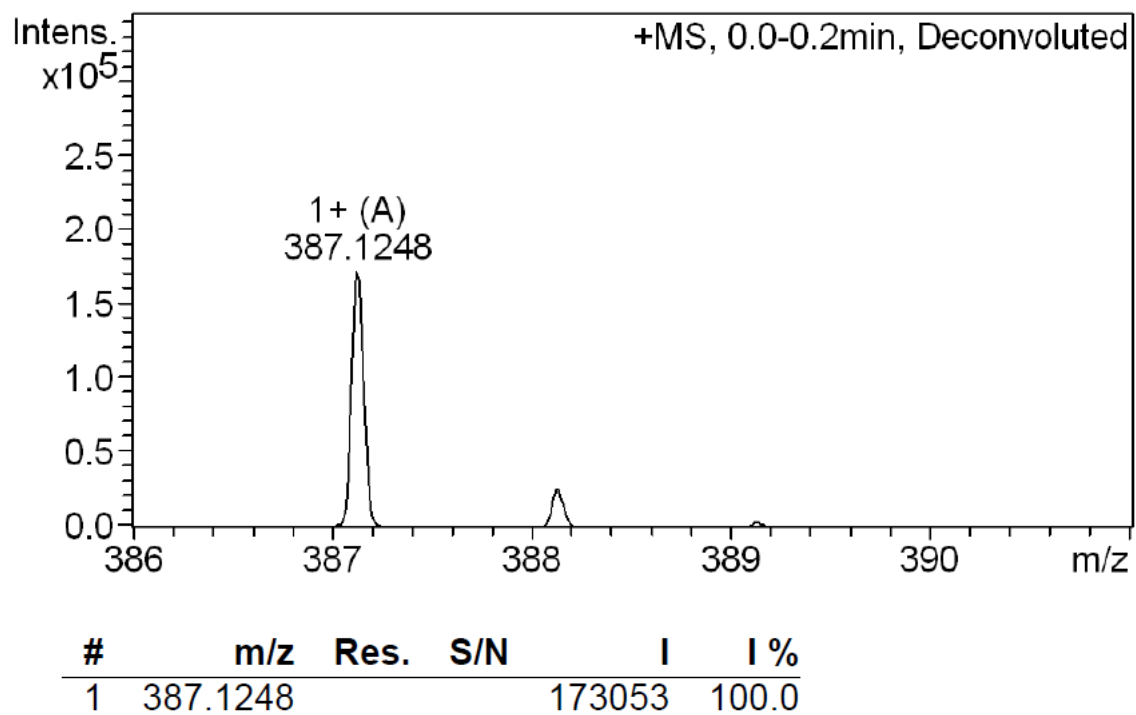

**Figure S64.** Copy of HRMS ESI analysis of the derivatives **12b**.

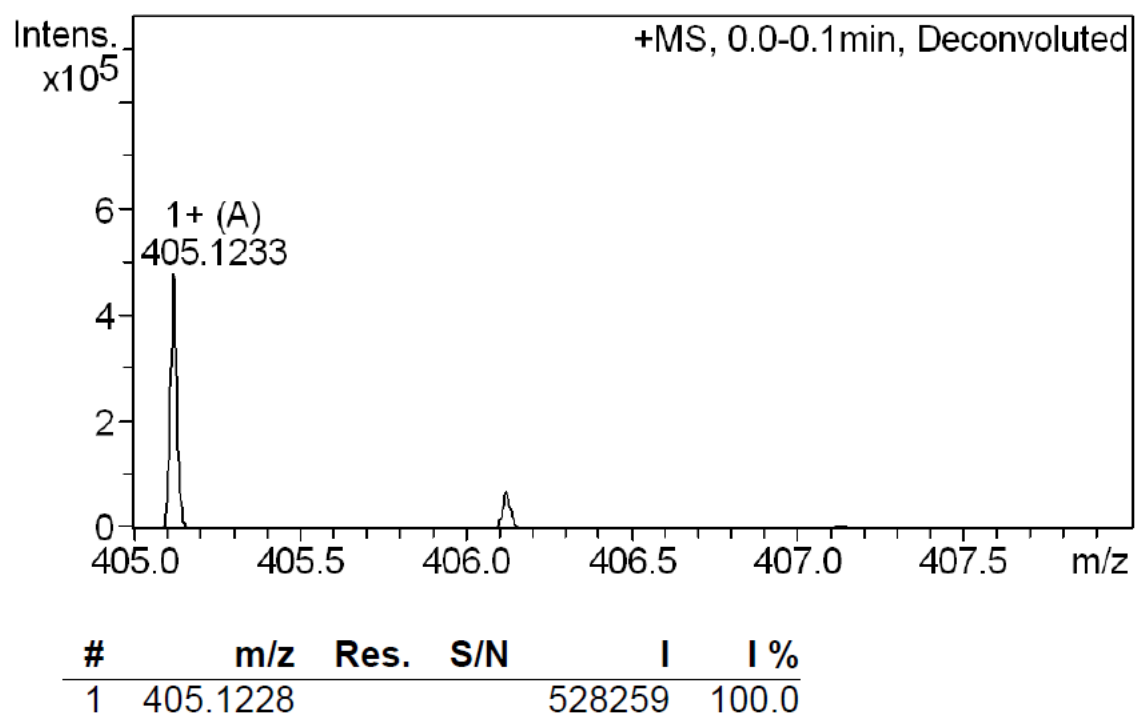

**Figure S65.** Copy of HRMS ESI analysis of the derivatives **12c**.

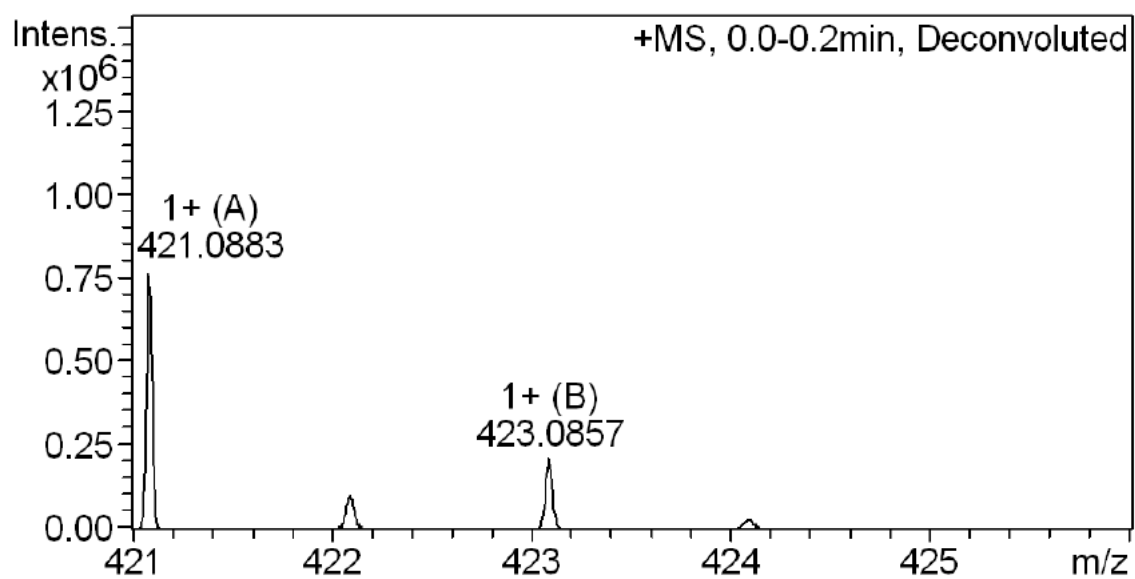

| # | m/z      | Res. | S/N | I      | I %   |
|---|----------|------|-----|--------|-------|
| 1 | 421.0881 |      |     | 795749 | 100.0 |
| 2 | 423.0857 |      |     | 219559 | 27.6  |



**Figure S66.** Copy of HRMS ESI analysis of the derivatives **13a**.

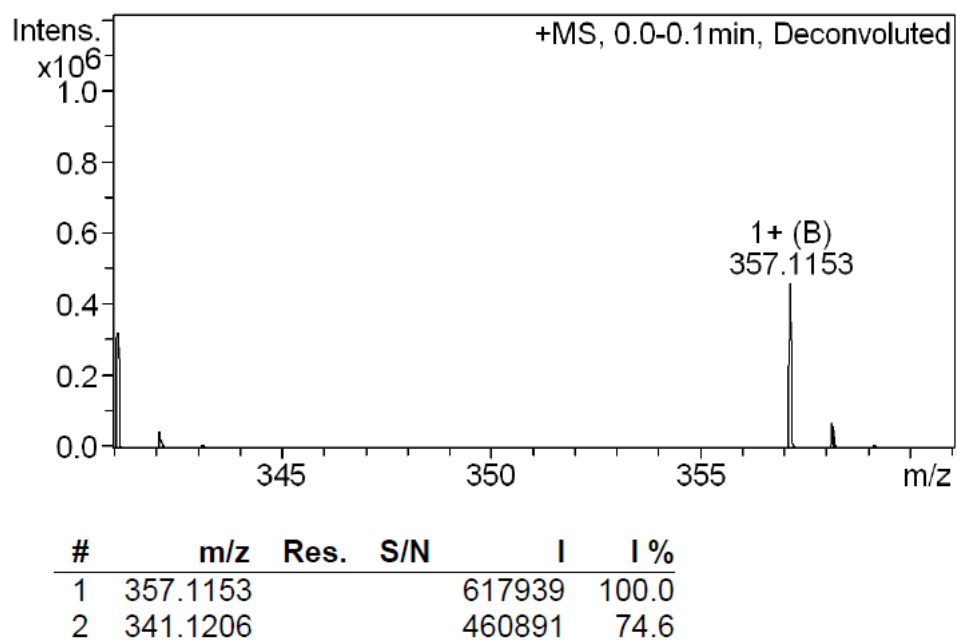

**Figure S67.** Copy of HRMS ESI analysis of the derivatives **13b**.

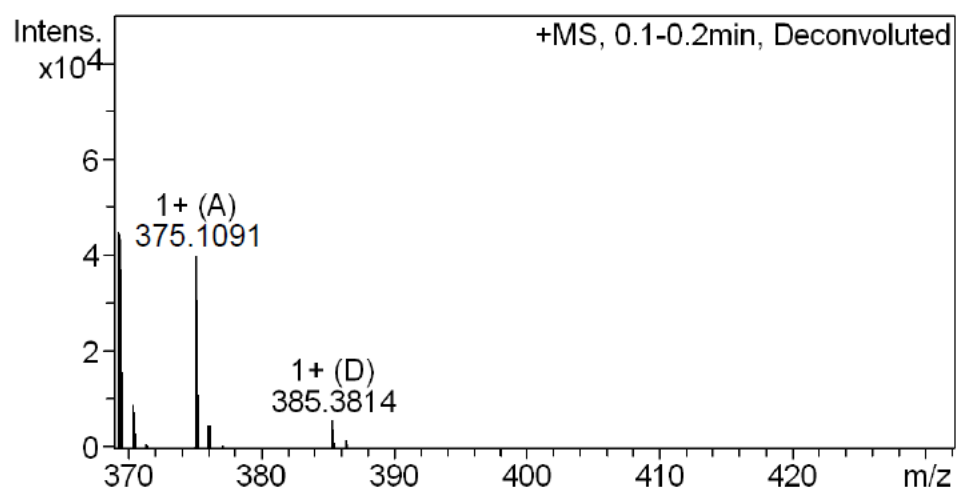

| # | m/z      | Res. | S/N | I     | I %   |
|---|----------|------|-----|-------|-------|
| 1 | 369.3856 |      |     | 45475 | 100.0 |
| 2 | 375.1091 |      |     | 42464 | 93.4  |
| 3 | 385.3814 |      |     | 5987  | 13.2  |

**Figure S68.** Copy of HRMS ESI analysis of the derivatives **13c**.

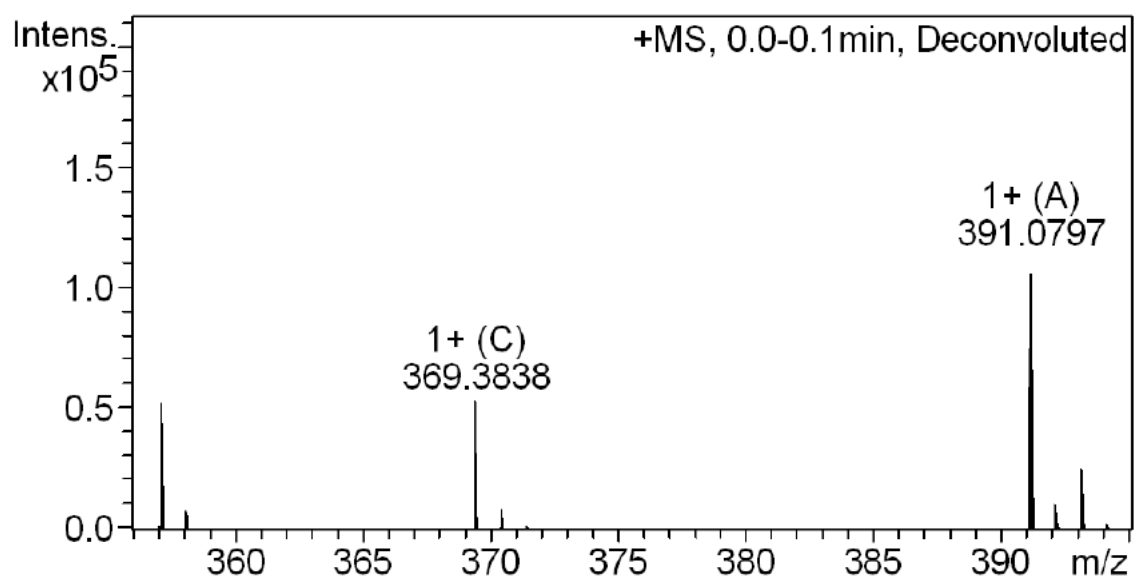

| # | m/z      | Res. | S/N | I      | I %   |
|---|----------|------|-----|--------|-------|
| 1 | 357.1185 |      |     | 56018  | 49.3  |
| 2 | 369.3838 |      |     | 54242  | 47.8  |
| 3 | 391.0797 |      |     | 113521 | 100.0 |
| 4 | 393.0772 |      |     | 25846  | 22.8  |

**Figure S69.** Copy of HRMS ESI analysis of the derivatives **14a**.

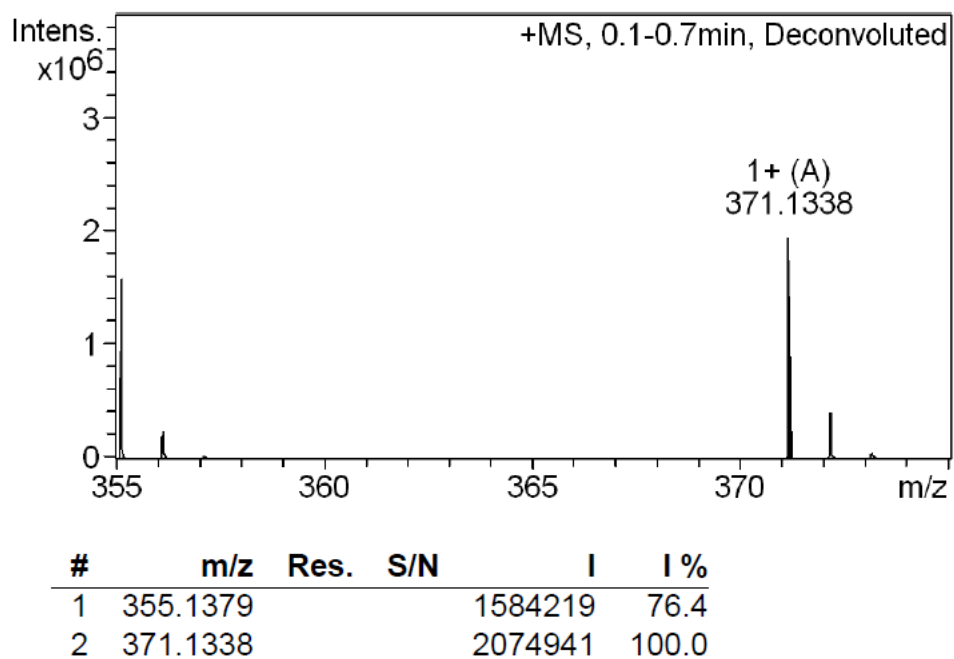

**Figure S70.** Copy of HRMS ESI analysis of the derivatives **14b**.

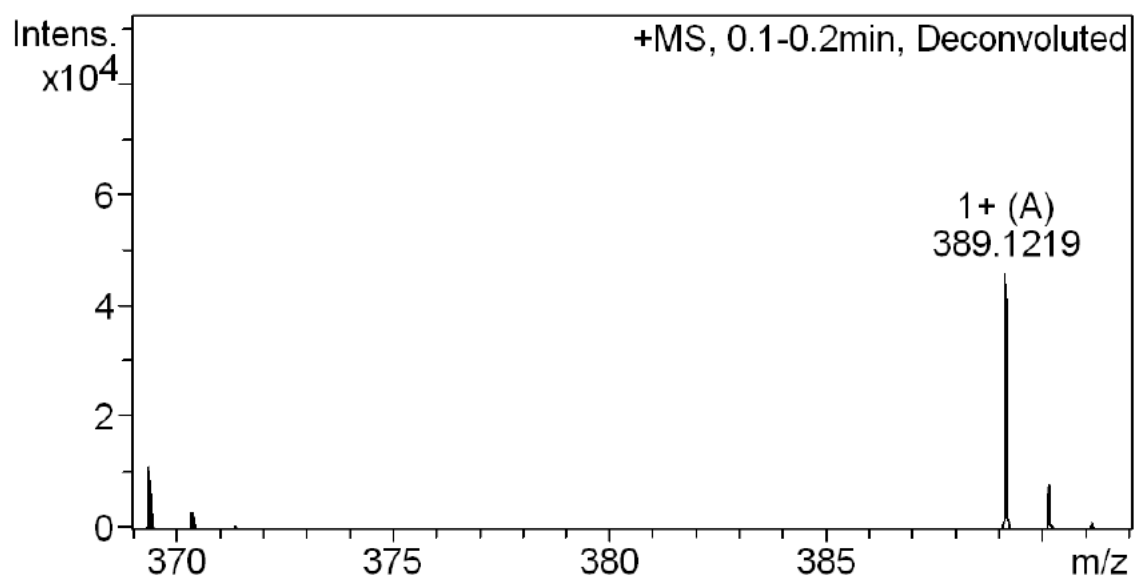

| # | m/z      | Res. | S/N | I     | I %   |
|---|----------|------|-----|-------|-------|
| 1 | 369.3836 |      |     | 11475 | 24.3  |
| 2 | 389.1219 |      |     | 47281 | 100.0 |

**Figure S71.** Copy of HRMS ESI analysis of the derivatives **14c**.

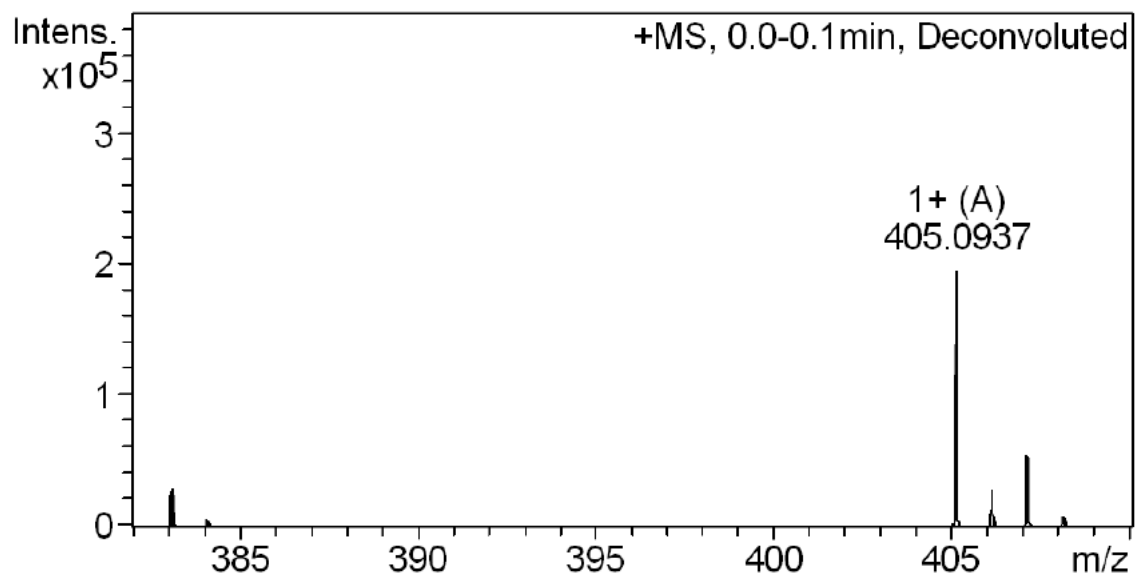

| # | m/z      | Res. | S/N | I      | I %   |
|---|----------|------|-----|--------|-------|
| 1 | 383.1023 |      |     | 29871  | 14.6  |
| 2 | 405.0937 |      |     | 203999 | 100.0 |
| 3 | 407.0904 |      |     | 54865  | 26.9  |

**Figure S72.** Copy of HRMS ESI analysis of the derivatives **15a**.

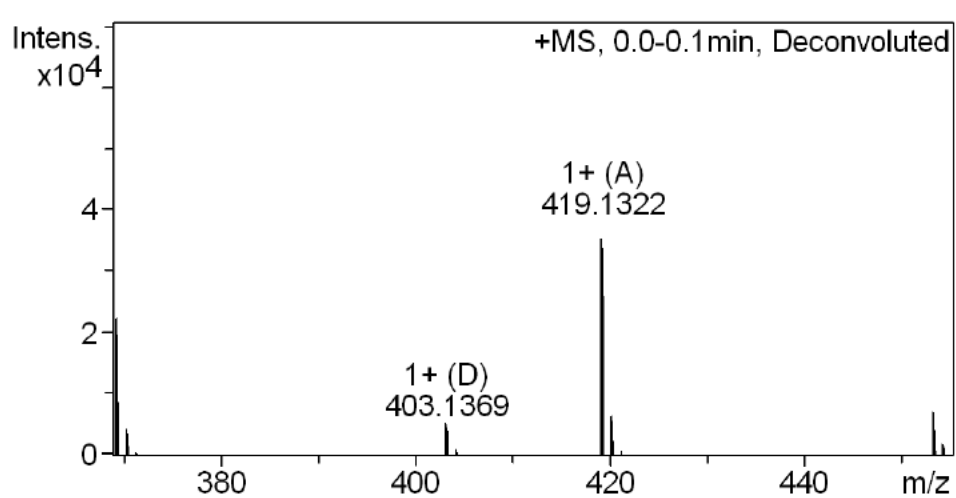

| # | m/z      | Res. | S/N | I     | I %   |
|---|----------|------|-----|-------|-------|
| 1 | 369.3823 |      |     | 23177 | 61.3  |
| 2 | 403.1369 |      |     | 5143  | 13.6  |
| 3 | 419.1322 |      |     | 37838 | 100.0 |
| 4 | 453.0924 |      |     | 7223  | 19.1  |

**Figure S73.** Copy of HRMS ESI analysis of the derivatives **15b**.

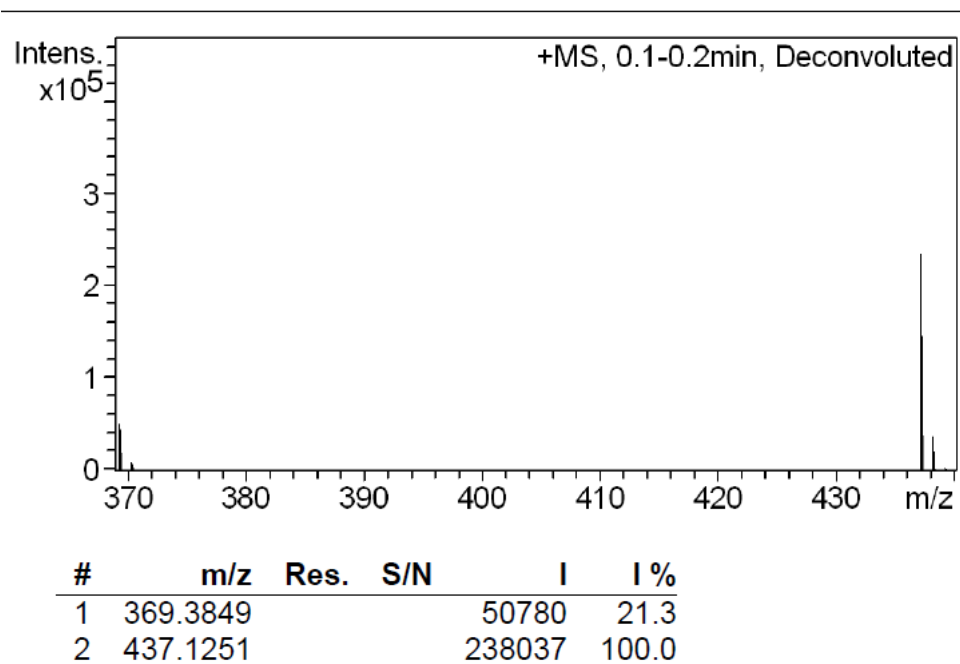



**Figure S74.** Copy of HRMS ESI analysis of the derivatives **15c**.

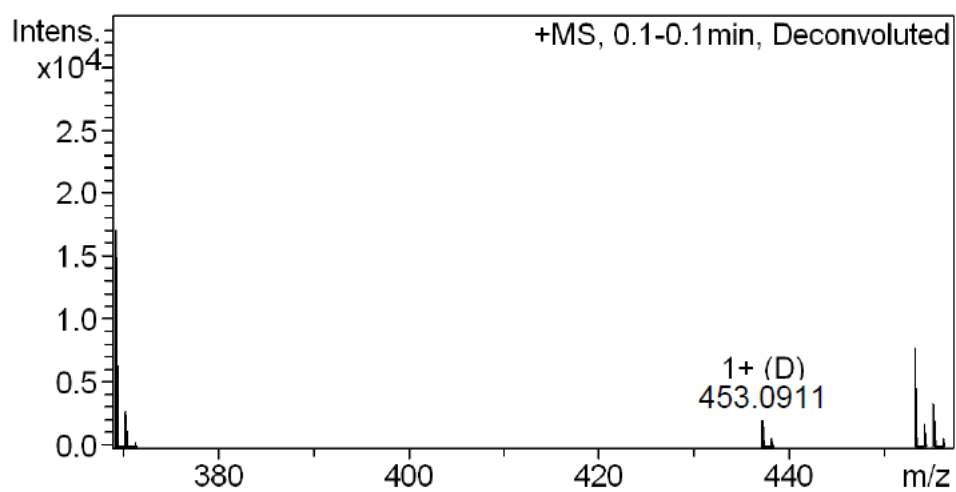

| # | m/z      | Res. | S/N | I     | I %   |
|---|----------|------|-----|-------|-------|
| 1 | 369.3809 |      |     | 17802 | 100.0 |
| 2 | 437.0975 |      |     | 2282  | 12.8  |
| 3 | 453.0918 |      |     | 7963  | 44.7  |
| 4 | 455.0892 |      |     | 3674  | 20.6  |

**Figure S75.** Copy of HRMS ESI analysis of the derivatives **15d**.

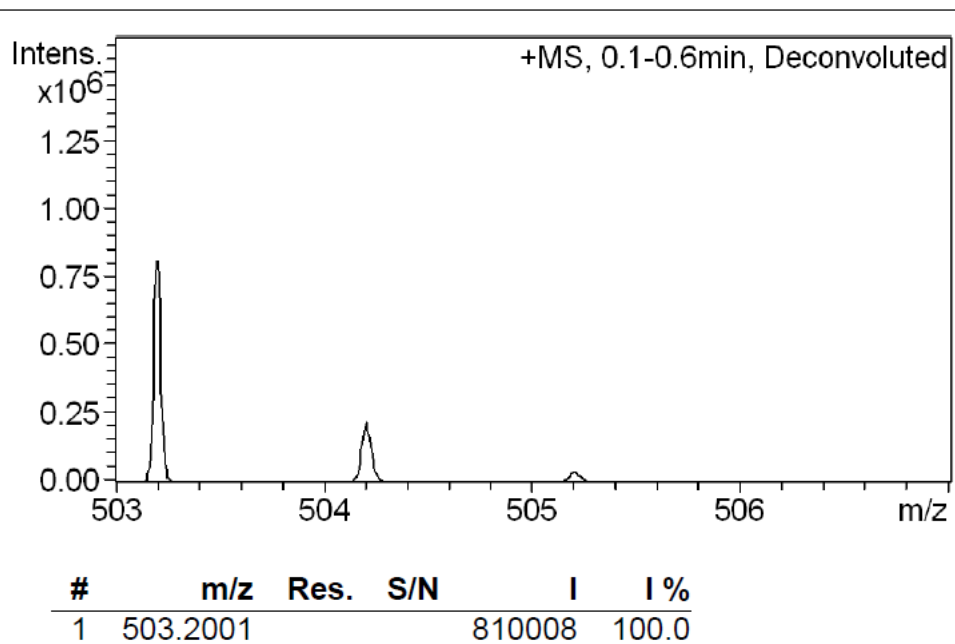

**Figure S76.** Copy of HRMS ESI analysis of the derivatives **16a**.

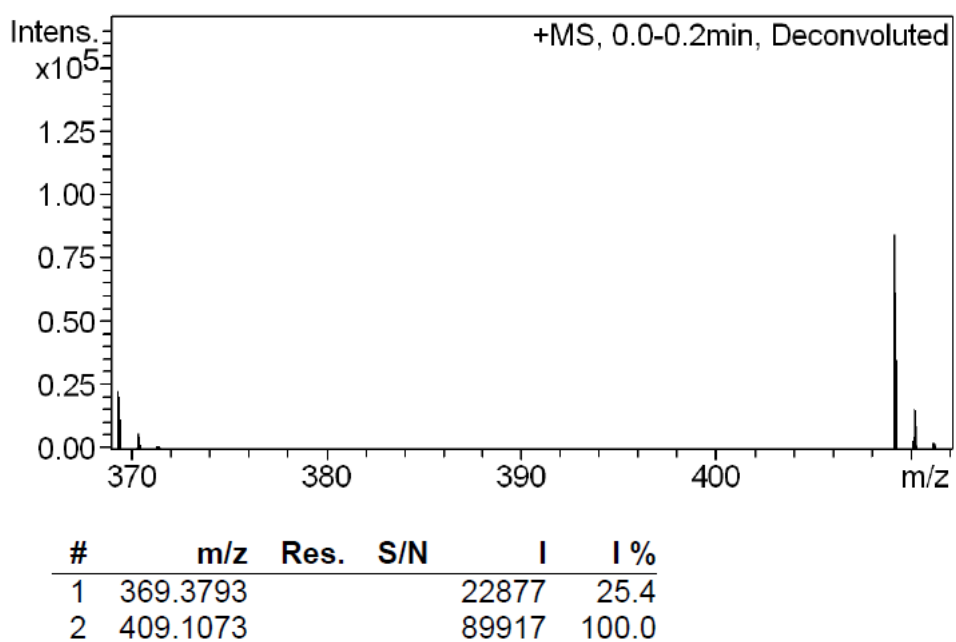

**Figure S77.** Copy of HRMS ESI analysis of the derivatives **16b**.

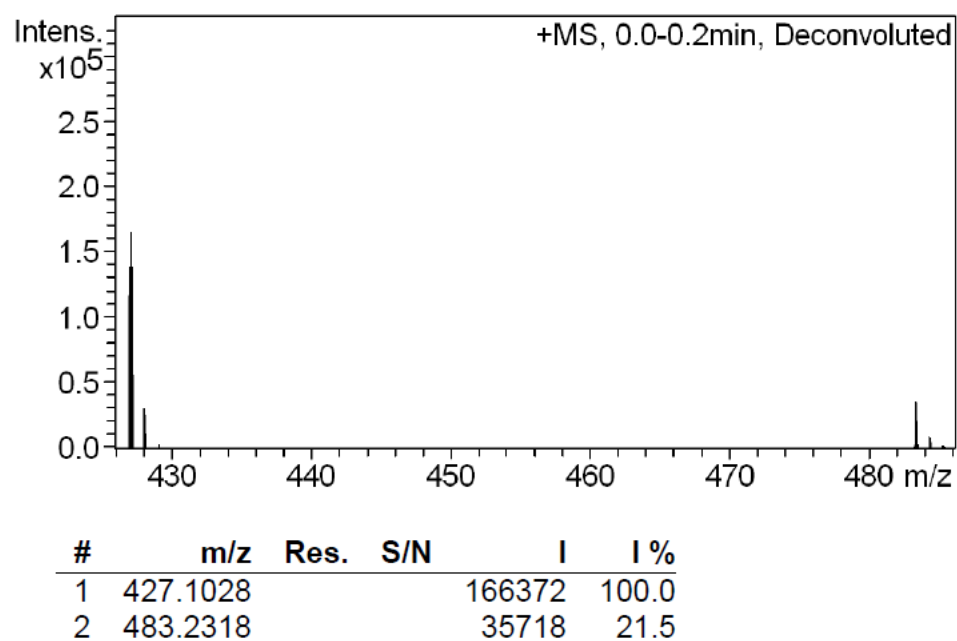

**Figure S78.** Copy of HRMS ESI analysis of the derivatives **16c**.

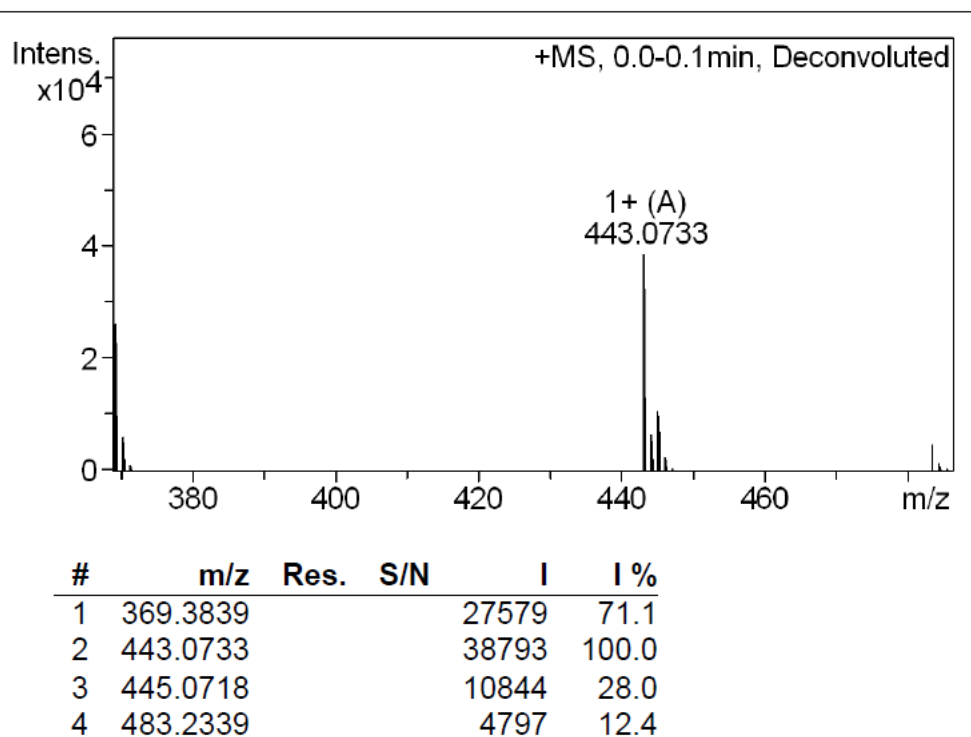

**Figure S79.** Copy of HRMS ESI analysis of the derivatives **16d**.

**+MS, 0.0-0.1min #(2-8)**

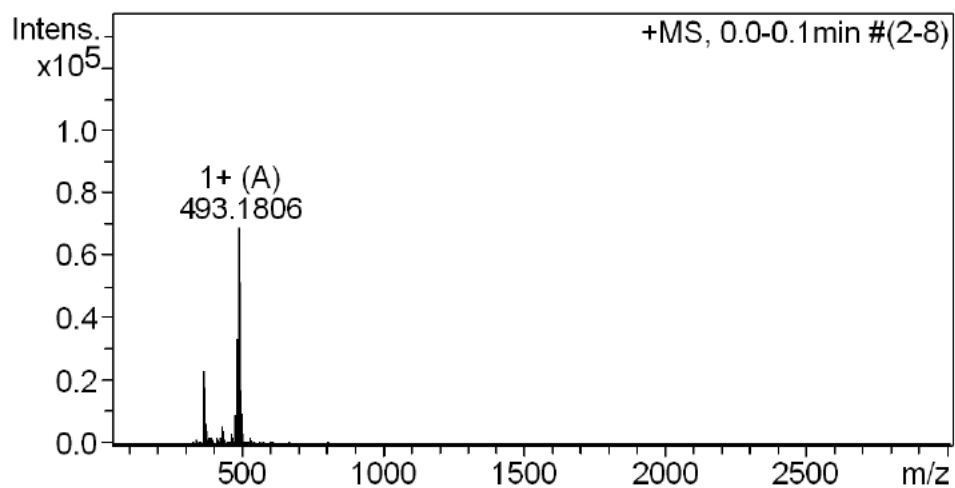

| # | m/z      | Res. | S/N | I     | I %   |
|---|----------|------|-----|-------|-------|
| 1 | 369.3840 |      |     | 23224 | 33.8  |
| 2 | 477.1856 |      |     | 9119  | 13.3  |
| 3 | 483.2308 |      |     | 33499 | 48.7  |
| 4 | 493.1803 |      |     | 68762 | 100.0 |

**Figure S80.** Copy of HRMS ESI analysis of the derivatives **17a**.

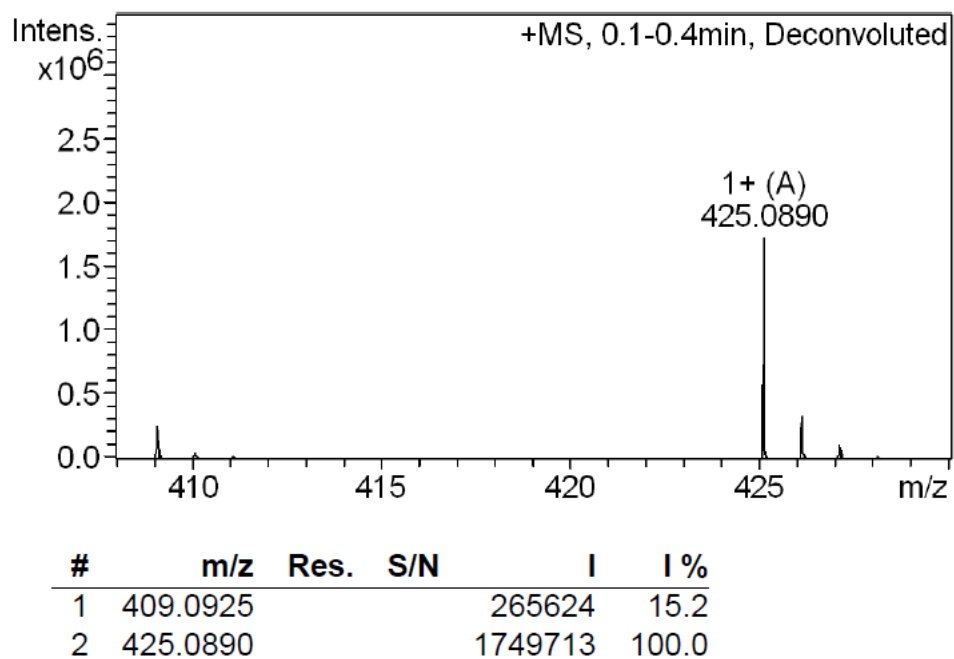

**Figure S81.** Copy of HRMS ESI analysis of the derivatives **17b**.

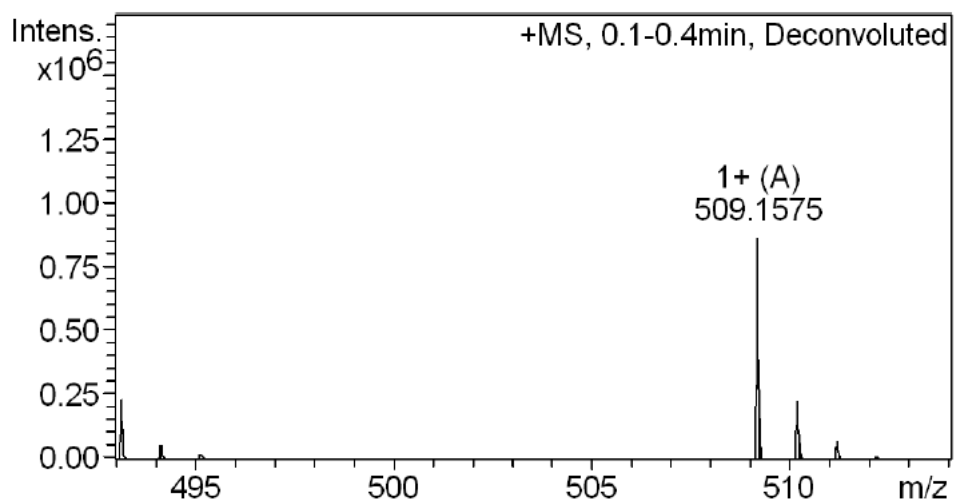

| # | m/z      | Res. | S/N | I      | I %   |
|---|----------|------|-----|--------|-------|
| 1 | 493.1608 |      |     | 235929 | 26.3  |
| 2 | 509.1575 |      |     | 898682 | 100.0 |



**Figure S82.** Copy of HRMS ESI analysis of the derivatives **17c**.

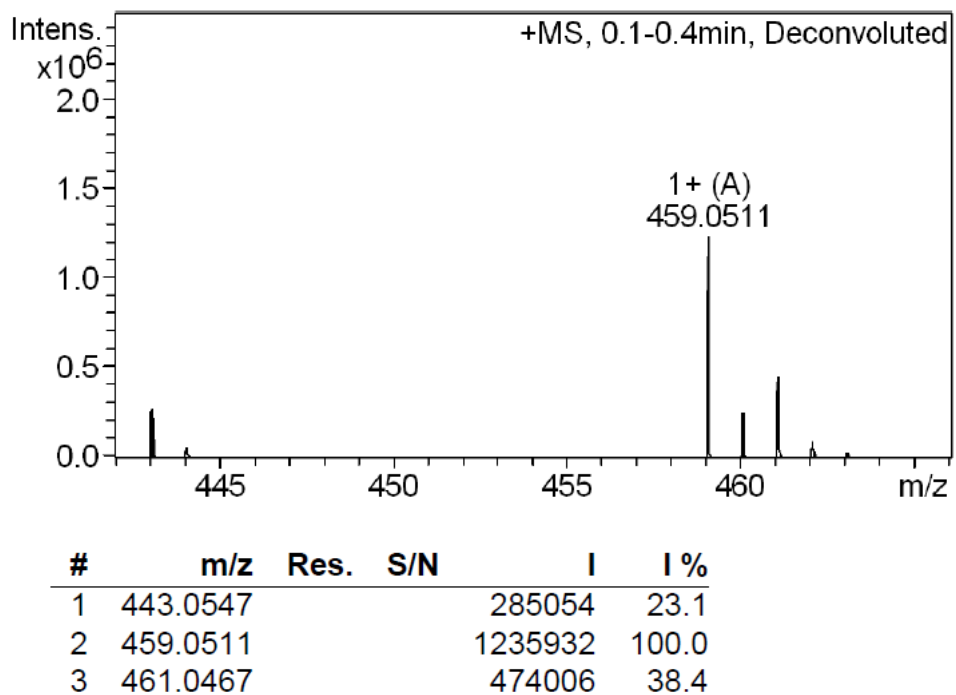

**Figure S83.** Copy of HRMS ESI analysis of the derivatives **17d**.

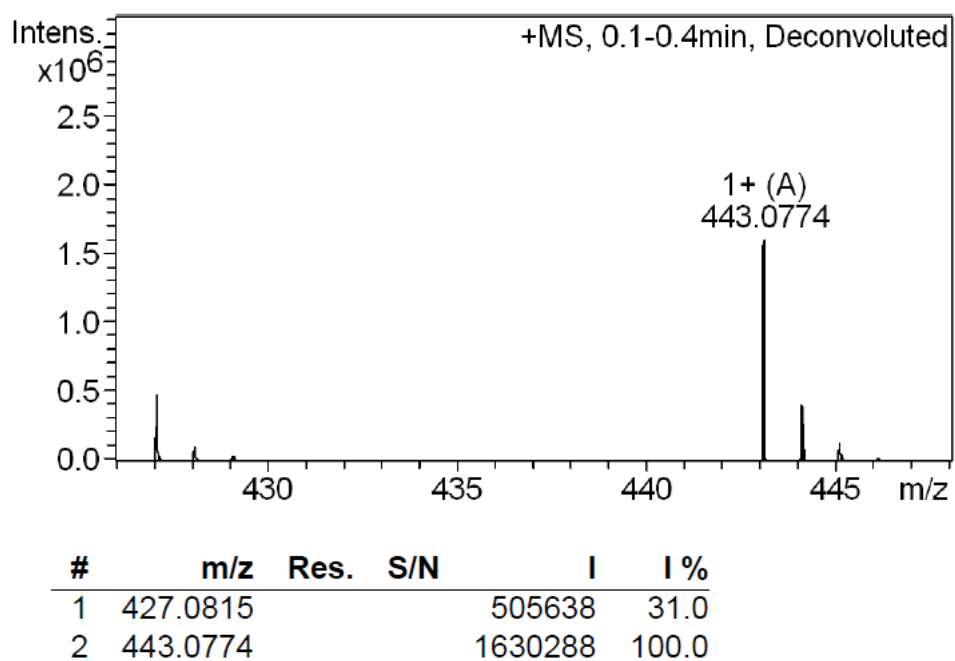

**Figure S84.** Copy of HRMS ESI analysis of the derivatives **18a**.

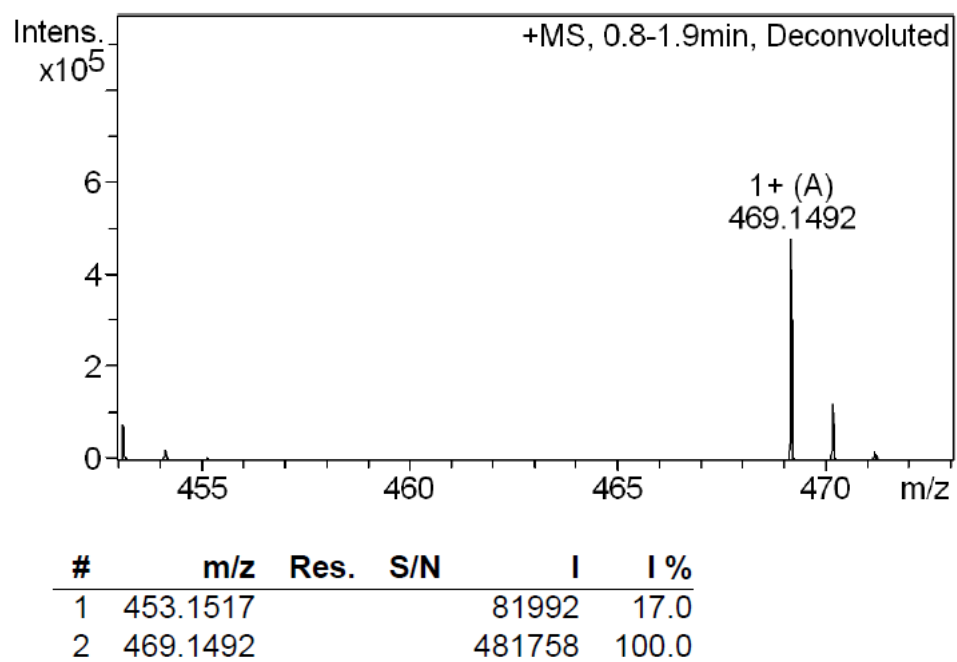

**Figure S85.** Copy of HRMS ESI analysis of the derivatives **18b**.

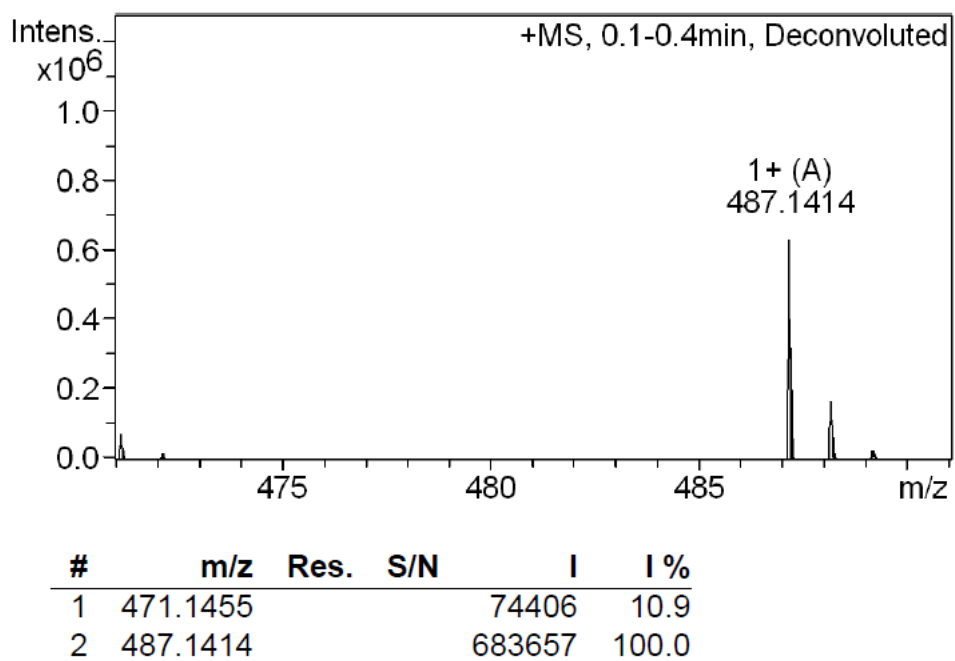

**Figure S86.** Copy of HRMS ESI analysis of the derivatives **18c**.

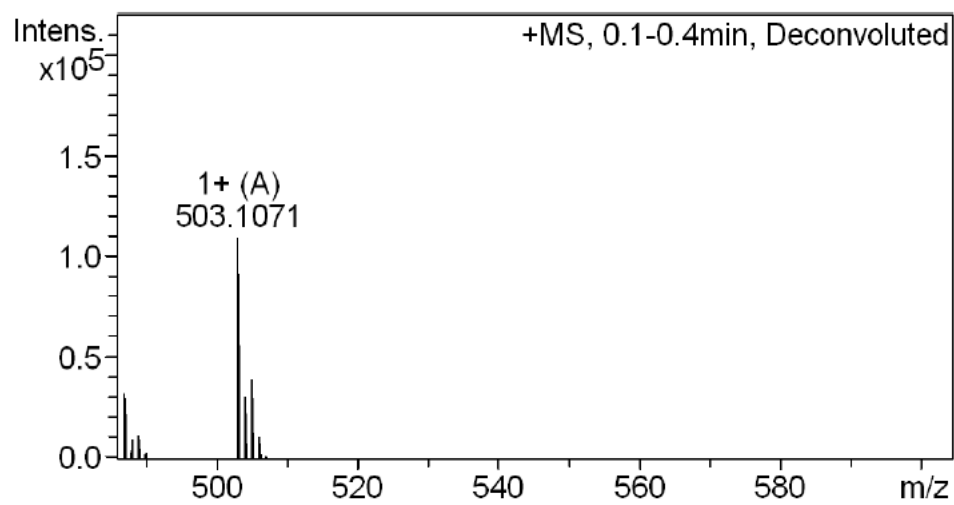

| # | m/z      | Res. | S/N | I      | I %   |
|---|----------|------|-----|--------|-------|
| 1 | 487.1108 |      |     | 33433  | 30.2  |
| 2 | 503.1071 |      |     | 110735 | 100.0 |
| 3 | 505.1058 |      |     | 39076  | 35.3  |

**Figure S87.** Copy of HRMS ESI analysis of the derivatives **18d**.

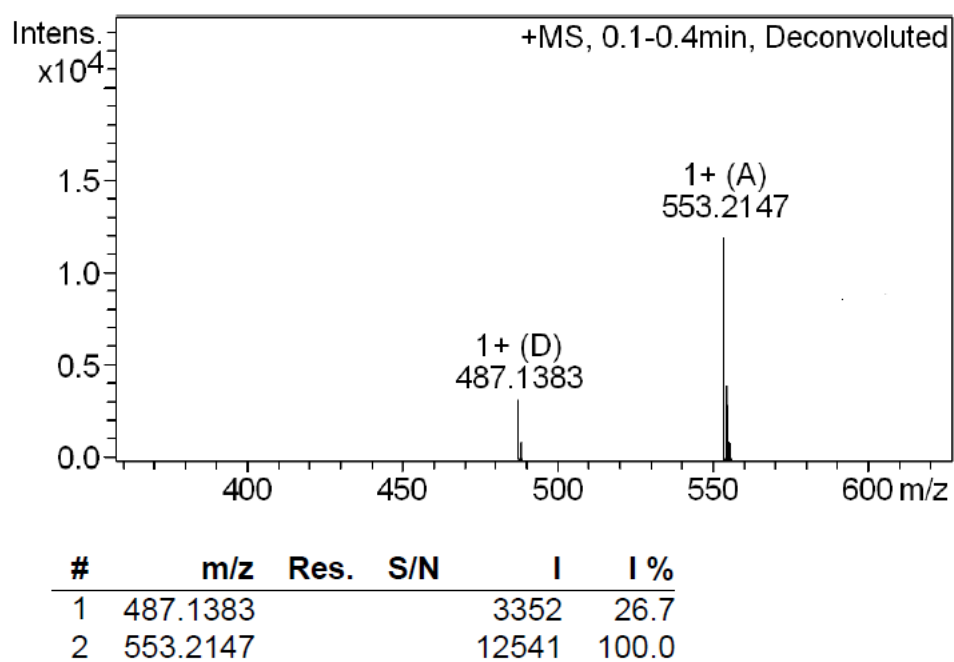

## Copies of HPLC Analysis

**Figure S88.** Copy HPLC analysis of the derivative **12a**.

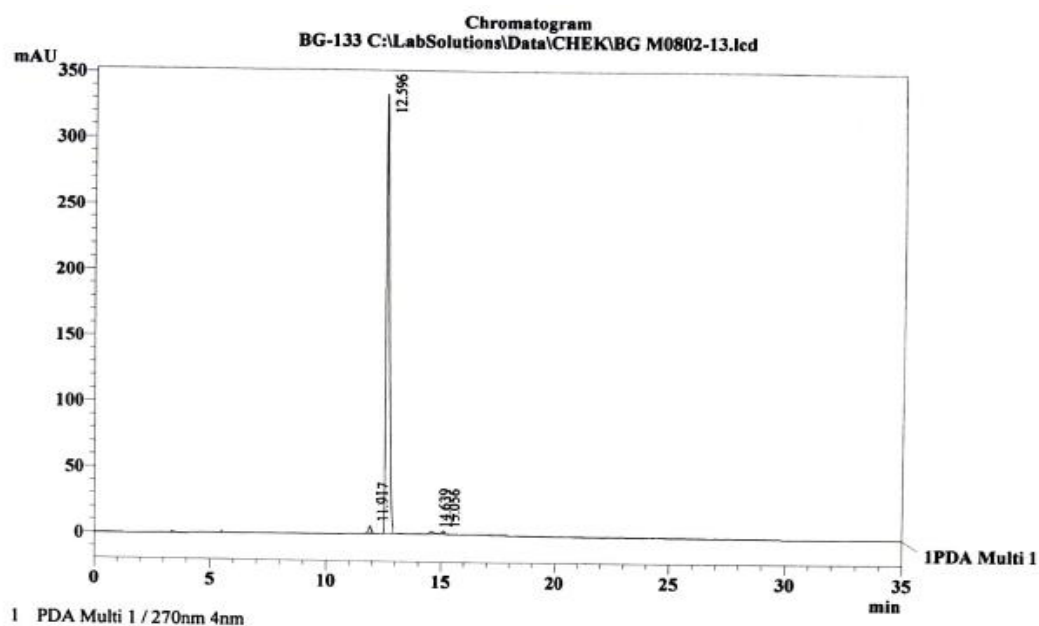

PeakTable

| Peak# | Ret. Time | Area    | Height | Area %  |
|-------|-----------|---------|--------|---------|
| 1     | 11.917    | 35314   | 5197   | 0.983   |
| 2     | 12.596    | 3531604 | 332109 | 98.258  |
| 3     | 14.639    | 16625   | 1606   | 0.463   |
| 4     | 15.056    | 10678   | 1623   | 0.297   |
| Total |           | 3594221 | 340534 | 100.000 |

| <<LC Program>> |            | Method  |       |  |
|----------------|------------|---------|-------|--|
| Time           | Unit       | Command | Value |  |
| 0.10           | Pumps      | B.Conc  | 20    |  |
| 30.00          | Pumps      | B.Conc  | 70    |  |
| 33.00          | Pumps      | B.Conc  | 20    |  |
| 43.00          | Controller | Stop    |       |  |

Method Filename : FOS Bv.lcm

Shimadzu LC-20AD; 2-System FOS, Colon Kromasil 100-C18, size 5µm, 4,6\*250mm, N 86912  
Elution: A - H3PO4 0.01M pH 2.6; B - MeCN, fl. 1,0 ml/min, loop 20µl.

**Figure S89.** Copy HPLC analysis of the derivative **12b**.

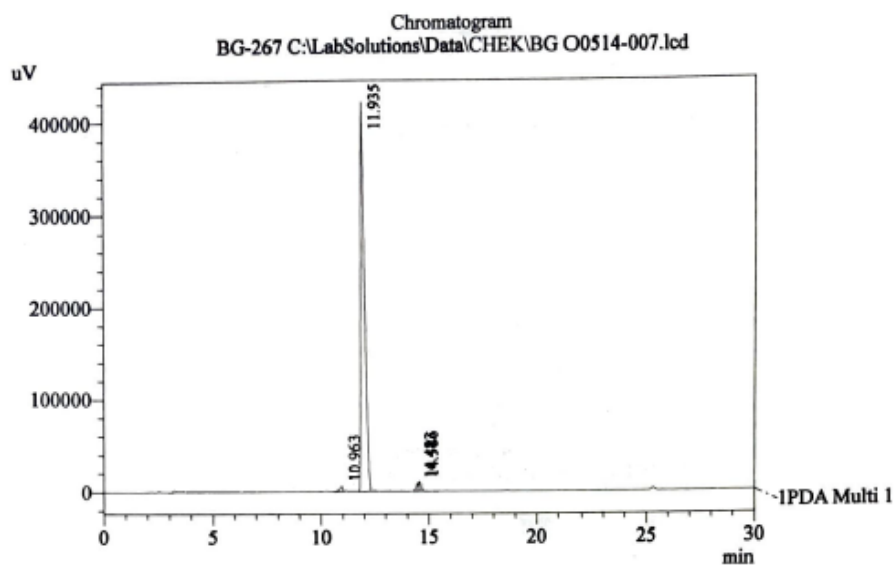

1 PDA Multi 1 / 335nm 4nm

PDA Ch1 335nm 4nm

| Peak# | Ret. Time | Area    | Height | Area %  |
|-------|-----------|---------|--------|---------|
| 1     | 10.963    | 59020   | 5953   | 1.023   |
| 2     | 11.935    | 5570934 | 419270 | 96.538  |
| 3     | 14.483    | 58454   | 8588   | 1.013   |
| 4     | 14.586    | 82319   | 10042  | 1.426   |
| Total |           | 5770728 | 443853 | 100.000 |

Method Filename : FOS Cv.lcm 15.05.2019 12:02:57

| Time  | Unit       | Command | Value |
|-------|------------|---------|-------|
| 0.10  | Pumps      | B.Conc  | 20    |
| 30.00 | Pumps      | B.Conc  | 80    |
| 33.00 | Pumps      | B.Conc  | 20    |
| 45.00 | Controller | Stop    |       |

Shimadzu LC-20 AD; System - FOS Colon- Kromasil-100-5nm. C-18, 4,6x250 mm. N 62511  
Elution: A - H<sub>3</sub>PO<sub>4</sub> 0,01M pH 2,6; B - MeCN, fl - 1.0 ml/min, loop 20 mkl



**Figure S90.** Copy HPLC analysis of the derivative **12c**.

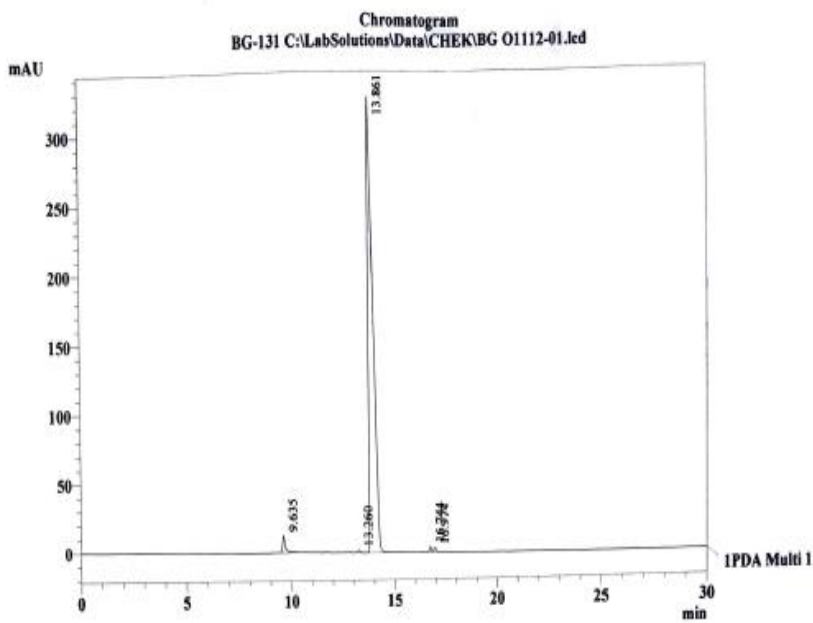

PeakTable

PDA Ch1 280nm 4nm

| Peak# | Ret. Time | Area    | Height | Area %  |
|-------|-----------|---------|--------|---------|
| 1     | 9.635     | 115727  | 12578  | 2.261   |
| 2     | 13.260    | 9718    | 1720   | 0.190   |
| 3     | 13.861    | 4947465 | 326451 | 96.640  |
| 4     | 16.744    | 26363   | 4086   | 0.515   |
| 5     | 16.974    | 20182   | 2983   | 0.394   |
| Total |           | 5119455 | 347818 | 100.000 |

| <<LC Program>> |            | Method  |       |
|----------------|------------|---------|-------|
|                |            | Unit    | Value |
| Time           |            | Command |       |
| 0.10           | Pumps      | B.Conc  | 20    |
| 30.00          | Pumps      | B.Conc  | 80    |
| 33.00          | Pumps      | B.Conc  | 20    |
| 45.00          | Controller | Stop    |       |

Method Filename : FOS Bv.lcm

Shimadzu LC-20AD; 2-System FOS, Colon Kromasil 100-C18, size 5µm, 4,6\*250mm, N 86912  
Elution: A - H3PO4 0.01M pH 2.6; B - MeCN, fl. 1.0 ml/min, loop 20µl.

**Figure S91.** Copy HPLC analysis of the derivative **13a**.

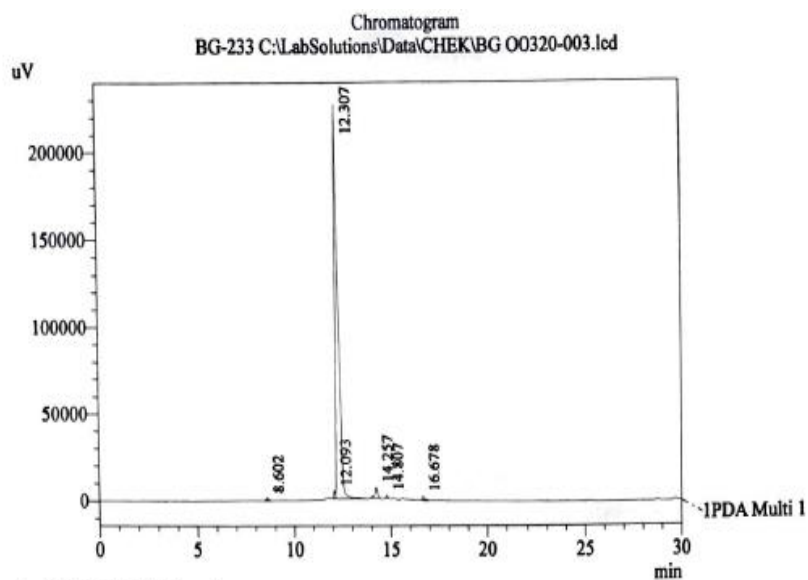

1 PDA Multi 1 / 336nm 4nm

PDA Ch1 336nm 4nm

| Peak# | Ret. Time | Area    | Height | Area %  |
|-------|-----------|---------|--------|---------|
| 1     | 8.602     | 12828   | 1522   | 0.473   |
| 2     | 12.093    | 28383   | 4661   | 1.046   |
| 3     | 12.307    | 2577588 | 225758 | 95.026  |
| 4     | 14.257    | 66260   | 6593   | 2.443   |
| 5     | 14.807    | 9100    | 1706   | 0.335   |
| 6     | 16.678    | 18348   | 2448   | 0.676   |
| Total |           | 2712507 | 242689 | 100.000 |

Method Filename : FOS B.lcm 22.03.2019 12:06:12

| Time  | Unit       | Command | Valu |
|-------|------------|---------|------|
| 0.01  | Pumps      | B.Conc  | 10   |
| 30.00 | Pumps      | B.Conc  | 90   |
| 33.00 | Pumps      | B.Conc  | 10   |
| 45.00 | Controller | Stop    |      |

Shimadzu LC-20 AD; System - FOS Colon- Kromasil-100-5mkm. C-18, 4,6x250 mm. N 62511  
Elution: A - H<sub>3</sub>PO<sub>4</sub> 0,01M pH 2,6; B - MeCN, fl - 1.0 ml/min, loop 20 mkl

**Figure S92.** Copy HPLC analysis of the derivative **13b**.

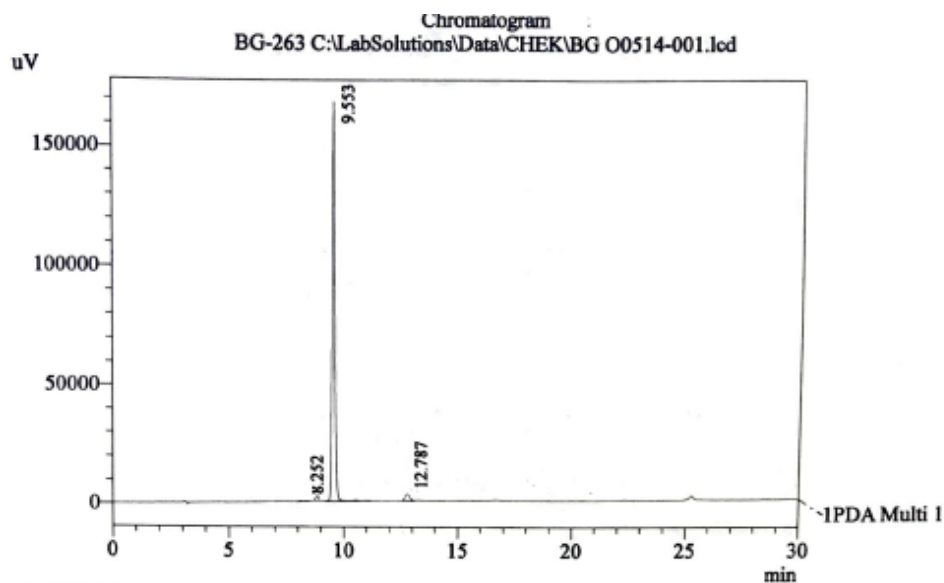

1 PDA Multi 1 / 335nm 4nm

PDA Ch1 335nm 4nm

| Peak# | Ret. Time | Area    | Height | Area %  |
|-------|-----------|---------|--------|---------|
| 1     | 8.252     | 16229   | 1052   | 1.056   |
| 2     | 9.553     | 1476035 | 167291 | 96.034  |
| 3     | 12.787    | 44726   | 3030   | 2.910   |
| Total |           | 1536990 | 171372 | 100.000 |

Method Filename : FOS Cv.lcm 14.05.2019 11:35:44

| Time  | Unit       | Command | Valu |
|-------|------------|---------|------|
| 0.10  | Pumps      | B.Conc  | 20   |
| 30.00 | Pumps      | B.Conc  | 80   |
| 33.00 | Pumps      | B.Conc  | 20   |
| 45.00 | Controller | Stop    |      |

Shimadzu LC-20 AD; System - FOS Colon- Kromasil-100-5mkm. C-18, 4,6x250 mm. N 62511  
Elution: A - H3PO4 0,01M pH 2,6; B - MeCN, fl - 1.0 ml/min, loop 20 mkl

**Figure S93.** Copy HPLC analysis of the derivative **13c**.

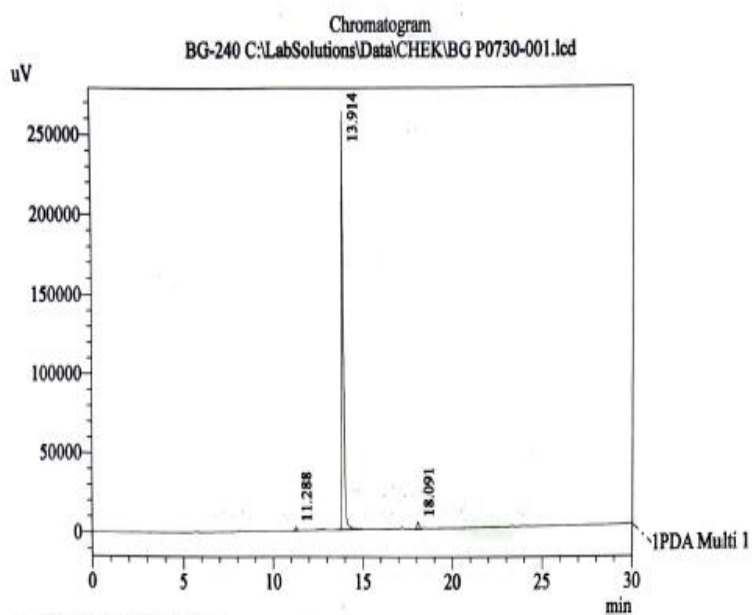

1 PDA Multi 1 / 282nm 4nm

PDA Ch1 282nm 4nm

| Peak# | Ret. Time | Area    | Height | Area %  |
|-------|-----------|---------|--------|---------|
| 1     | 11.288    | 16610   | 2356   | 0.791   |
| 2     | 13.914    | 2043760 | 261903 | 97.370  |
| 3     | 18.091    | 38589   | 4247   | 1.838   |
| Total |           | 2098959 | 268505 | 100.000 |

Method Filename : FRA02Bv.lcm 30.07.2020 11:47:43

| Time  | Unit       | Command | Valu |
|-------|------------|---------|------|
| 0.01  | Pumps      | B.Conc  | 20   |
| 30.00 | Pumps      | B.Conc  | 60   |
| 33.00 | Pumps      | B.Conc  | 20   |
| 45.00 | Controller | Stop    |      |

Shimadzu LC-20 AD; System - FOS Colon- Kromasil-100-5µm. C-18, 4,6x250 mm. N 62511  
Elution: A - H<sub>3</sub>PO<sub>4</sub> 0,01M pH 2,6; B - MeCN, fl - 1.0 ml/min, loop 20 mkl

**Figure S94.** Copy HPLC analysis of the derivative **14a**.

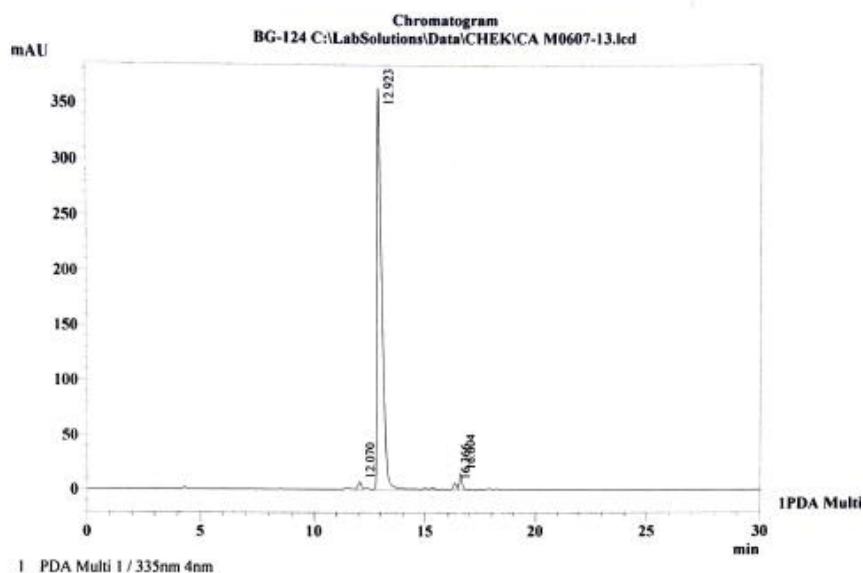

PeakTable

| Peak# | Ret. Time | Area    | Height | Area %  |
|-------|-----------|---------|--------|---------|
| 1     | 12.070    | 71650   | 7000   | 1.246   |
| 2     | 12.923    | 5496103 | 365027 | 95.593  |
| 3     | 16.366    | 53490   | 6481   | 0.930   |
| 4     | 16.604    | 128246  | 15340  | 2.231   |
| Total |           | 5749489 | 393848 | 100.000 |

| <<LC Program>> |            | Method  |       |
|----------------|------------|---------|-------|
| Time           | Unit       | Command | Value |
| 0.10           | Pumps      | B.Conc  | 20    |
| 30.00          | Pumps      | B.Conc  | 60    |
| 33.00          | Pumps      | B.Conc  | 20    |
| 43.00          | Controller | Stop    |       |

Method Filename : FOS Bv.lcm

Shimadzu LC-20AD; 2-System FOS, Colon Kromasil 100-C18, size 5µm, 4,6\*250mm, N 86912  
Elution: A - H3PO4 0.01M pH 2.6; B - MeCN, fl. 1,0 ml/min, loop 20µl.

**Figure S95.** Copy HPLC analysis of the derivative **14b**.

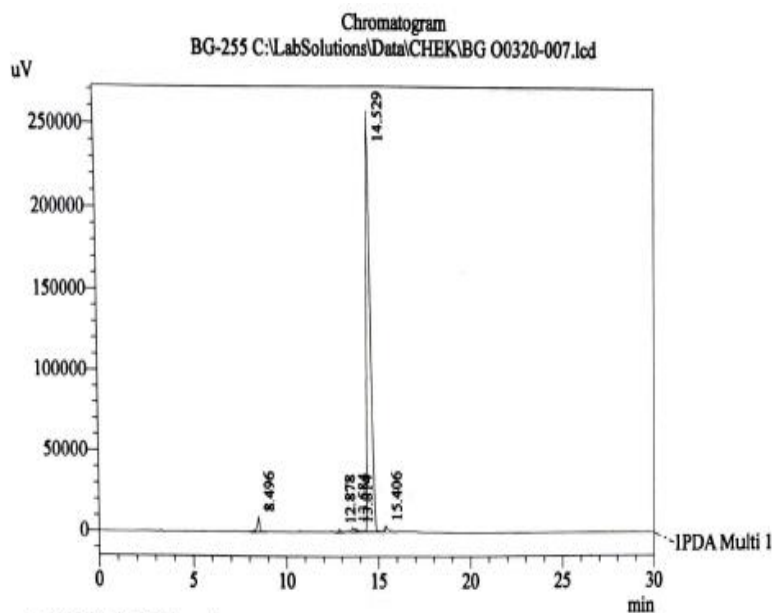

1 PDA Multi 1 / 335nm 4nm

PDA Ch1 335nm 4nm

| Peak# | Ret. Time | Area    | Height | Area %  |
|-------|-----------|---------|--------|---------|
| 1     | 8.496     | 90003   | 9615   | 2.308   |
| 2     | 12.878    | 16135   | 2004   | 0.414   |
| 3     | 13.584    | 33972   | 2892   | 0.871   |
| 4     | 13.814    | 14572   | 1811   | 0.374   |
| 5     | 14.529    | 3719342 | 256981 | 95.380  |
| 6     | 15.406    | 25470   | 3212   | 0.653   |
| Total |           | 3899494 | 276516 | 100.000 |

Method Filename : FOS B.lcm 22.03.2019 15:32:07

| Time  | Unit       | Command | Value |
|-------|------------|---------|-------|
| 0.01  | Pumps      | B.Conc  | 10    |
| 30.00 | Pumps      | B.Conc  | 90    |
| 33.00 | Pumps      | B.Conc  | 10    |
| 45.00 | Controller | Stop    |       |

Shimadzu LC-20 AD; System - FOS Colon- Kromasil-100-5mk. C-18, 4,6x250 mm. N 62511  
Elution: A - H<sub>3</sub>PO<sub>4</sub> 0,01M pH 2,6; B - MeCN, fl - 1.0 ml/min, loop 20 ml

**Figure S96.** Copy HPLC analysis of the derivative **14c**.

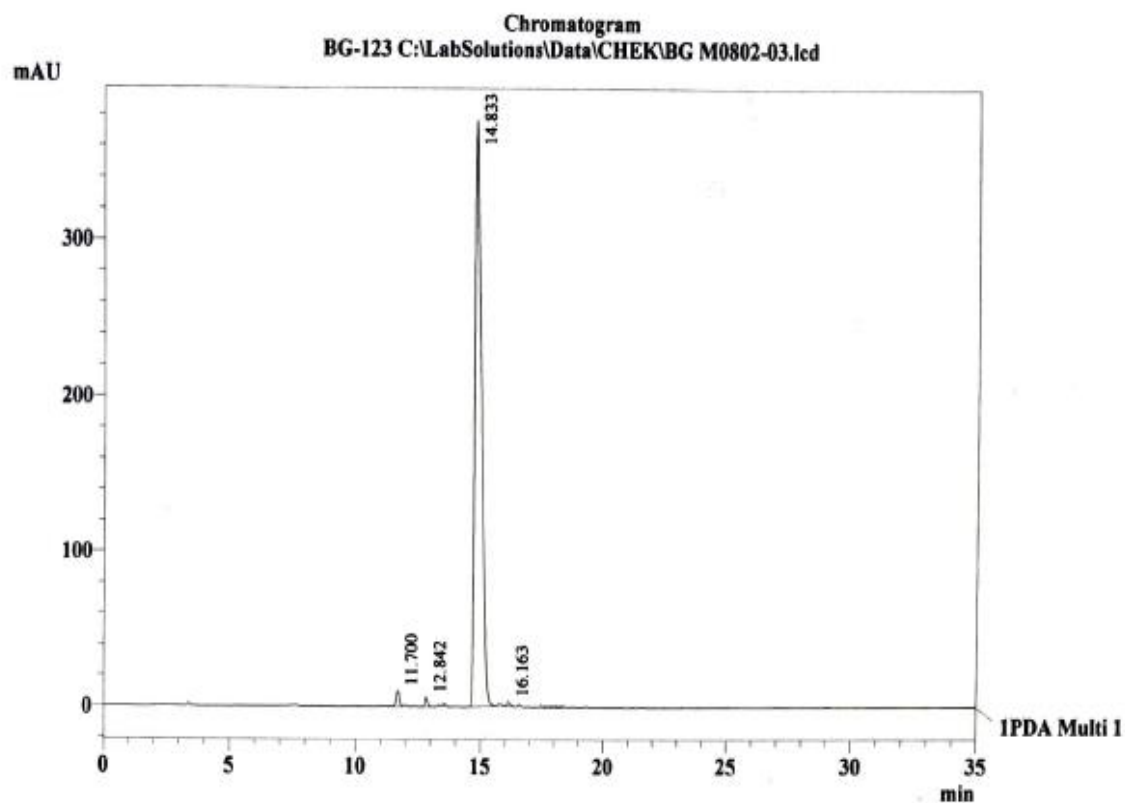

PeakTable

| PDA Ch1 280nm 4nm |           |         |        |         |
|-------------------|-----------|---------|--------|---------|
| Peak#             | Ret. Time | Area    | Height | Area %  |
| 1                 | 11.700    | 84428   | 10293  | 1.217   |
| 2                 | 12.842    | 44681   | 6264   | 0.644   |
| 3                 | 14.833    | 6782069 | 375700 | 97.787  |
| 4                 | 16.163    | 24403   | 3024   | 0.352   |
| Total             |           | 6935581 | 395280 | 100.000 |

| <<LC Program>> |            |         |       |
|----------------|------------|---------|-------|
| Time           | Unit       | Command | Value |
| 0.10           | Pumps      | B.Conc  | 20    |
| 30.00          | Pumps      | B.Conc  | 70    |
| 33.00          | Pumps      | B.Conc  | 20    |
| 43.00          | Controller | Stop    |       |

Method Filename : FOS Bv.lcm

Shimadzu LC-20AD; 2-System FOS, Colon Kromasil 100-C18, size 5mk, 4,6\*250mm, N 86912  
Elution: A - H3PO4 0.01M pH 2.6; B - MeCN, fl. 1.0 ml/min, loop 20mk.

**Figure S97.** Copy HPLC analysis of the derivative **15a**.

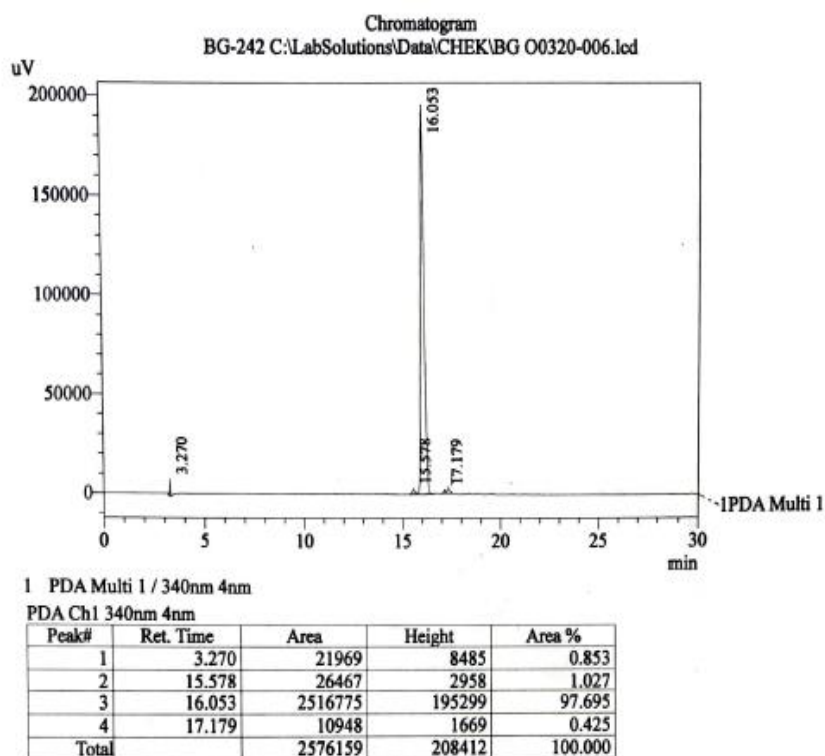

Method Filename : FOS B.lcm 22.03.2019 14:46:27

| Time  | Unit       | Command | Valu |
|-------|------------|---------|------|
| 0.01  | Pumps      | B.Conc  | 10   |
| 30.00 | Pumps      | B.Conc  | 90   |
| 33.00 | Pumps      | B.Conc  | 10   |
| 45.00 | Controller | Stop    |      |

Shimadzu LC-20 AD; System - FOS Colon- Kromasil-100-5mk. C-18, 4,6x250 mm. N 62511  
Elution: A - H<sub>3</sub>PO<sub>4</sub> 0,01M pH 2,6; B - MeCN, fl - 1.0 ml/min, loop 20 mkl



**Figure S98.** Copy HPLC analysis of the derivative **15b**.

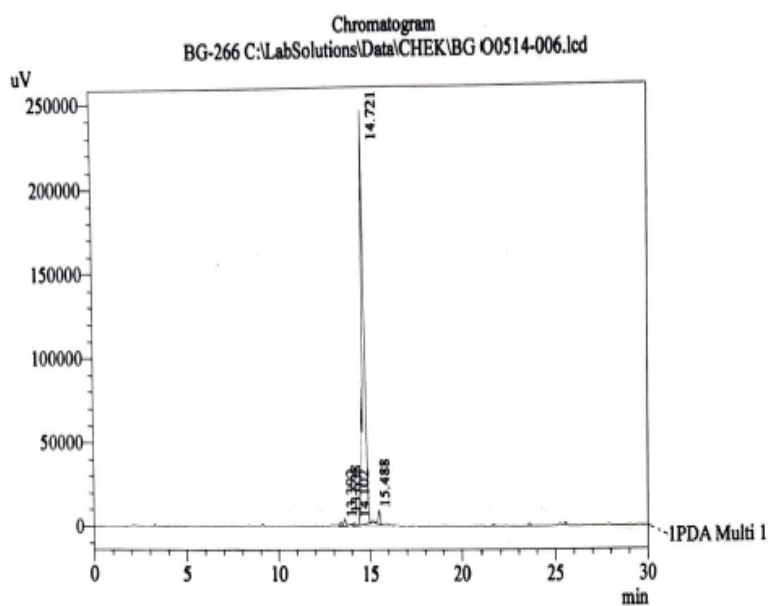

1 PDA Multi 1 / 270nm 4nm

PDA Ch1 270nm 4nm

| Peak# | Ret. Time | Area    | Height | Area %  |
|-------|-----------|---------|--------|---------|
| 1     | 13.392    | 20917   | 2455   | 0.688   |
| 2     | 13.638    | 39466   | 4817   | 1.299   |
| 3     | 14.102    | 16347   | 1907   | 0.538   |
| 4     | 14.721    | 2892005 | 242954 | 95.164  |
| 5     | 15.488    | 70246   | 8382   | 2.311   |
| Total |           | 3038981 | 260516 | 100.000 |

Method Filename : FOS Cv.lcm 15.05.2019 11:03:01

| Time  | Unit       | Command | Value |
|-------|------------|---------|-------|
| 0.10  | Pumps      | B.Conc  | 20    |
| 30.00 | Pumps      | B.Conc  | 80    |
| 33.00 | Pumps      | B.Conc  | 20    |
| 45.00 | Controller | Stop    |       |

Shimadzu LC-20 AD; System - FOS Colon- Kromasil-100-5mkm. C-18, 4,6x250 mm. N 62511  
Elution: A - H3PO4 0,01M pH 2,6; B - MeCN, fl - 1.0 ml/min, loop 20 mkl

**Figure S99.** Copy HPLC analysis of the derivative **15c**.

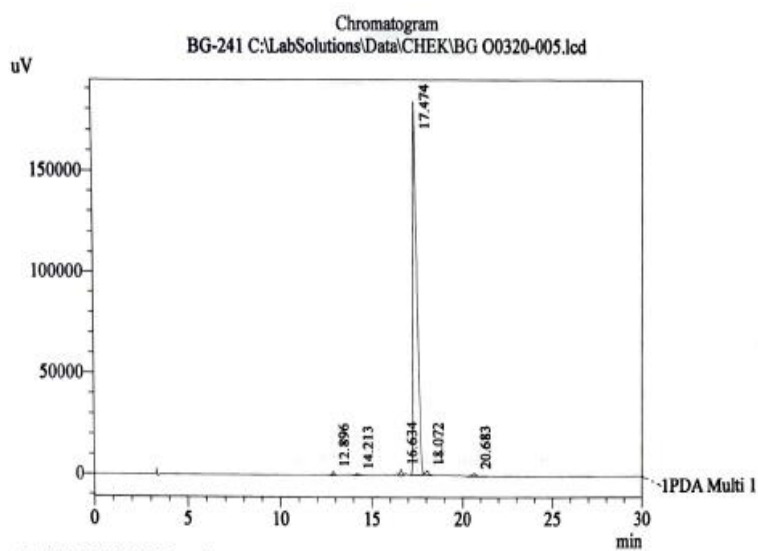

1 PDA Multi 1 / 345nm 4nm

PDA Ch1 345nm 4nm

| Peak# | Ret. Time | Area    | Height | Area %  |
|-------|-----------|---------|--------|---------|
| 1     | 12.896    | 12848   | 1759   | 0.434   |
| 2     | 14.213    | 9028    | 796    | 0.305   |
| 3     | 16.634    | 26626   | 3032   | 0.899   |
| 4     | 17.474    | 2864072 | 183756 | 96.726  |
| 5     | 18.072    | 29139   | 2378   | 0.984   |
| 6     | 20.683    | 19310   | 1454   | 0.652   |
| Total |           | 2961023 | 193175 | 100.000 |

Method Filename : FOS B.lcm 22.03.2019 13:50:10

| Time  | Unit       | Command | Value |
|-------|------------|---------|-------|
| 0.01  | Pumps      | B.Conc  | 10    |
| 30.00 | Pumps      | B.Conc  | 90    |
| 33.00 | Pumps      | B.Conc  | 10    |
| 45.00 | Controller | Stop    |       |

Shimadzu LC-20 AD; System - FOS Colon- Kromasil-100-5mk. C-18, 4,6x250 mm. N 62511  
Elution: A - H<sub>3</sub>PO<sub>4</sub> 0,01M pH 2,6; B - MeCN, fl - 1.0 ml/min, loop 20 mkl

**Figure S100.** Copy HPLC analysis of the derivative **15d**.

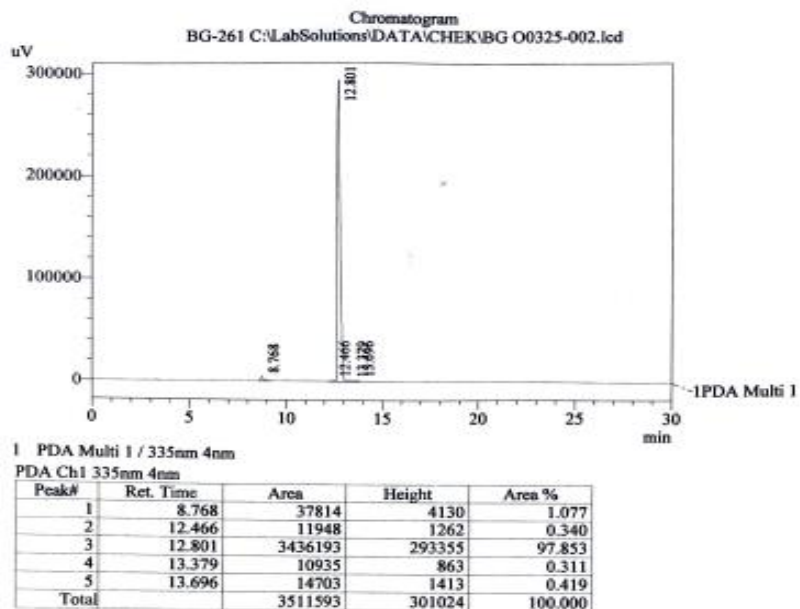

Method Filename : FOS B.lcm 25.03.2019 12:44:40

| Time  | Unit       | Command | Val |
|-------|------------|---------|-----|
| 0.01  | Pumps      | B.Conc  | 10  |
| 30.00 | Pumps      | B.Conc  | 90  |
| 33.00 | Pumps      | B.Conc  | 10  |
| 45.00 | Controller | Stop    |     |

Shimadzu LC-20 AD; System - FOS Colon- Kromasil-100-5µm. C-18, 4.6x250 mm. N 62511  
Elution: A - H<sub>3</sub>PO<sub>4</sub> 0.01M pH 2.6; B - MeCN, fl - 1.0 ml/min, loop 20 µl

**Figure S101.** Copy HPLC analysis of the derivative **16a**.

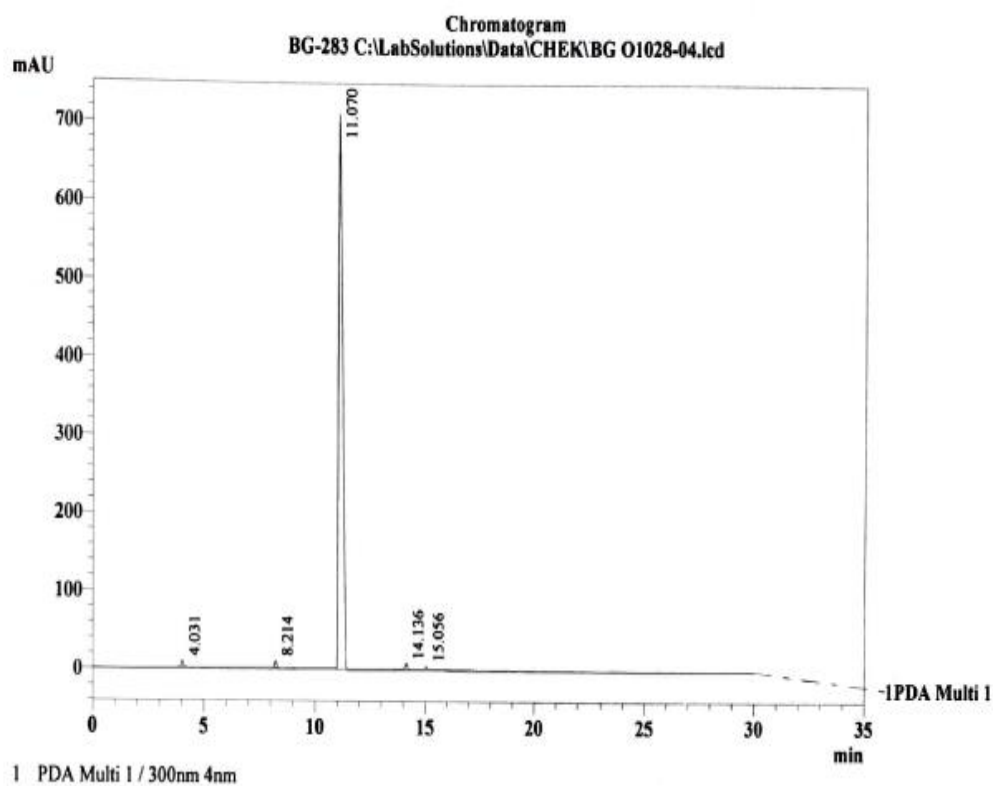

PeakTable

PDA Ch1 300nm 4nm

| Peak# | Ret. Time | Area    | Height | Area %  |
|-------|-----------|---------|--------|---------|
| 1     | 4.031     | 54755   | 9470   | 0.594   |
| 2     | 8.214     | 62143   | 10153  | 0.675   |
| 3     | 11.070    | 9015662 | 710338 | 97.872  |
| 4     | 14.136    | 55219   | 7987   | 0.599   |
| 5     | 15.056    | 23880   | 4778   | 0.259   |
| Total |           | 9211660 | 742726 | 100.000 |

Method

| <<LC Program>> |            |         |       |
|----------------|------------|---------|-------|
| Time           | Unit       | Command | Value |
| 0.10           | Pumps      | B.Conc  | 20    |
| 30.00          | Pumps      | B.Conc  | 80    |
| 33.00          | Pumps      | B.Conc  | 20    |
| 45.00          | Controller | Stop    |       |

Method Filename : FOS Bv.lcm

Shimadzu LC-20AD; 2-System FOS, Colon Kromasil 100-C18,.size 5mkm, 4,6\*250mm, N 86912  
Elution: A - H3PO4 0.01M pH 2.6; B - MeCN, fl. 1,0 ml/min, loop 20mkl.

**Figure S102.** Copy HPLC analysis of the derivative **16b**.

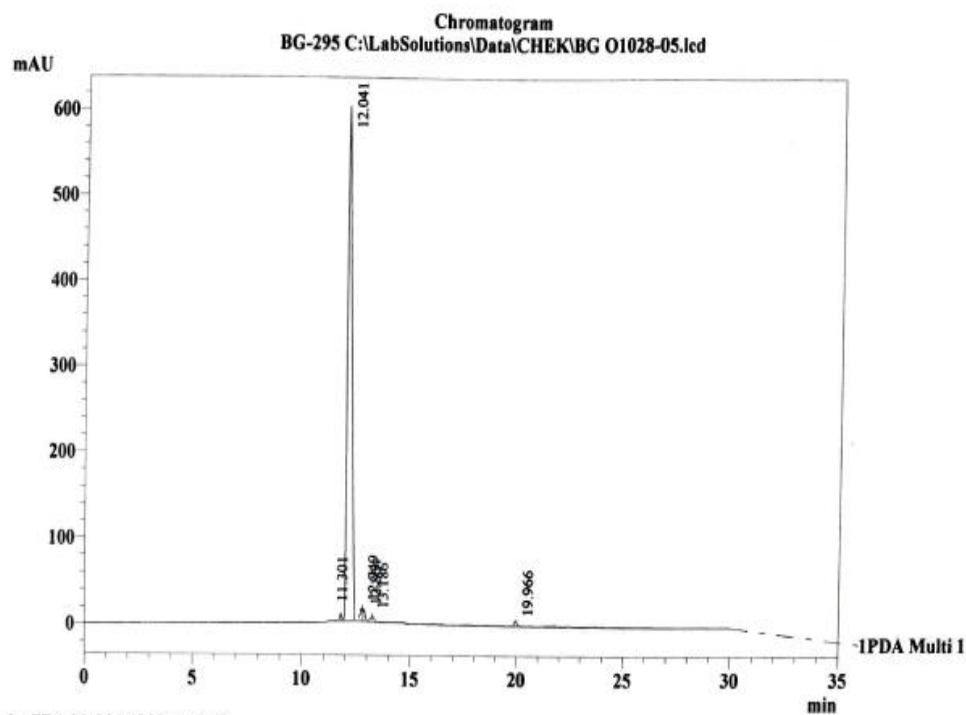

1 PDA Multi 1 / 300nm 4nm

**PeakTable**

PDA Ch1 300nm 4nm

| Peak# | Ret. Time | Area    | Height | Area %  |
|-------|-----------|---------|--------|---------|
| 1     | 11.301    | 70426   | 15169  | 0.798   |
| 2     | 12.041    | 8430647 | 598641 | 95.525  |
| 3     | 12.749    | 139503  | 19092  | 1.581   |
| 4     | 12.864    | 85081   | 14156  | 0.964   |
| 5     | 13.186    | 38471   | 7836   | 0.436   |
| 6     | 19.966    | 61480   | 7220   | 0.697   |
| Total |           | 8825608 | 662114 | 100.000 |

**Method**

<<LC Program>>

| Time  | Unit       | Command | Value |
|-------|------------|---------|-------|
| 0.10  | Pumps      | B.Conc  | 20    |
| 30.00 | Pumps      | B.Conc  | 80    |
| 33.00 | Pumps      | B.Conc  | 20    |
| 45.00 | Controller | Stop    |       |

Method Filename : FOS Bv.lcm

Shimadzu LC-20AD; 2-System FOS, Colon Kromasil 100-C18, size 5µm, 4,6\*250mm, N 86912  
Elution: A - H3PO4 0.01M pH 2.6; B - MeCN, fl. 1.0 ml/min, loop 20µl.

**Figure S103.** Copy HPLC analysis of the derivative **16c**.

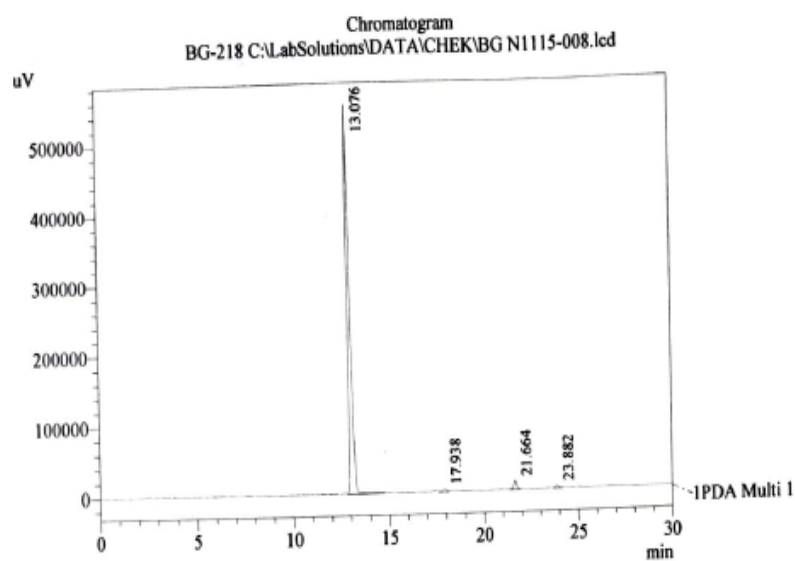

1 PDA Multi 1 / 290nm 4nm

PDA Ch1 290nm 4nm

| Peak# | Ret. Time | Area    | Height | Area %  |
|-------|-----------|---------|--------|---------|
| 1     | 13.076    | 5514284 | 552527 | 96.385  |
| 2     | 17.938    | 39610   | 3897   | 0.692   |
| 3     | 21.664    | 130350  | 12504  | 2.278   |
| 4     | 23.882    | 36860   | 3574   | 0.644   |
| Total |           | 5721104 | 572501 | 100.000 |

Method Filename : FOS A.lcm 16.11.2018 14:07:52

| Time  | Unit       | Command | Val. |
|-------|------------|---------|------|
| 0.01  | Pumps      | B.Cone  | 5    |
| 30.00 | Pumps      | B.Cone  | 20   |
| 33.00 | Pumps      | B.Cone  | 5    |
| 45.00 | Controller | Stop    |      |

Shimadzu LC-20 AD; System - FOS Colon- Kromasil-100-5mk. C-18, 4,6x250 mm. N 62511  
Elution: A - H3PO4 0,01M pH 2,6; B - MeCN, fl - 1.0 ml/min, loop 20 mkl

**Figure S104.** Copy HPLC analysis of the derivative **16d**.

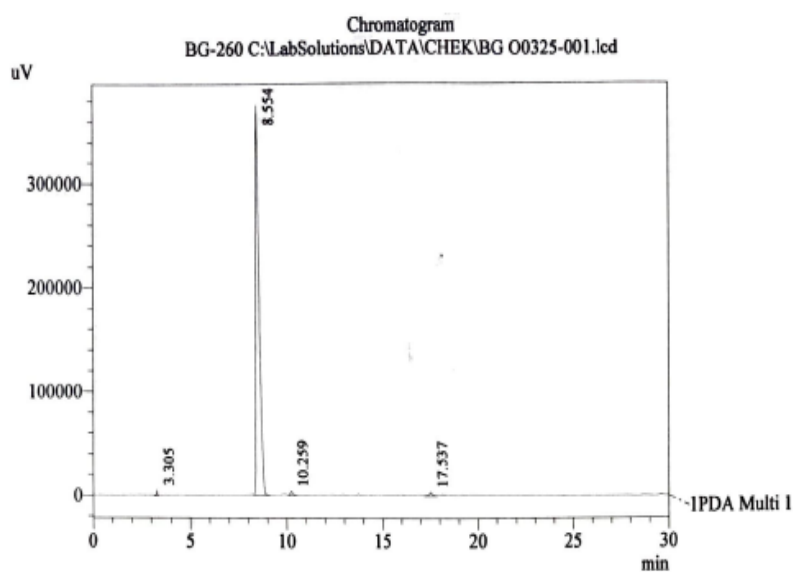

1 PDA Multi 1 / 335nm 4nm

PDA Ch1 335nm 4nm

| Peak# | Ret. Time | Area    | Height | Area %  |
|-------|-----------|---------|--------|---------|
| 1     | 3.305     | 21511   | 5742   | 0.437   |
| 2     | 8.554     | 4830693 | 374893 | 98.063  |
| 3     | 10.259    | 33626   | 4069   | 0.683   |
| 4     | 17.537    | 40262   | 4019   | 0.817   |
| Total |           | 4926092 | 388723 | 100.000 |

Method Filename : FOS B.lcm 25.03.2019 11:43:21

| Time  | Unit       | Command | Val. |
|-------|------------|---------|------|
| 0.01  | Pumps      | B.Conc  | 10   |
| 30.00 | Pumps      | B.Conc  | 90   |
| 33.00 | Pumps      | B.Conc  | 10   |
| 45.00 | Controller | Stop    |      |

Shimadzu LC-20 AD; System - FOS Colon- Kromasil-100-5mkm. C-18, 4,6x250 mm. N 62511  
Elution: A - H3PO4 0,01M pH 2,6; B - MeCN, fl - 1.0 ml/min, loop 20 mkl

**Figure S105.** Copy HPLC analysis of the derivative **17a**.

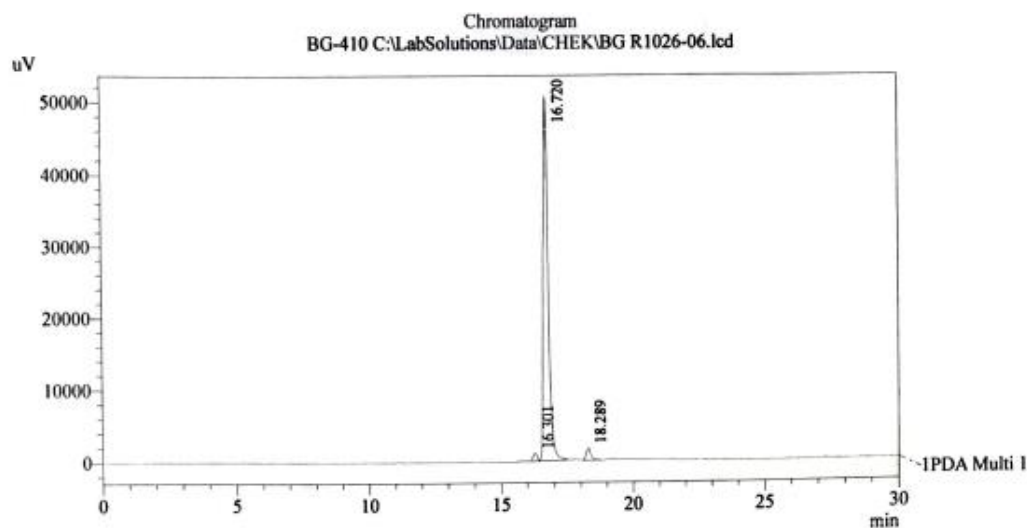

1 PDA Multi 1 / 470nm 4nm

PDA Ch1 470nm 4nm

| Peak# | Ret. Time | Area   | Height | Area %  |
|-------|-----------|--------|--------|---------|
| 1     | 16.301    | 12851  | 1135   | 1.933   |
| 2     | 16.720    | 631218 | 50599  | 94.967  |
| 3     | 18.289    | 20603  | 1692   | 3.100   |
| Total |           | 664672 | 53427  | 100.000 |

Method Filename : FRA02BvApr.lcm 26.10.2021 15:52:58

| Time  | Unit       | Command | Valu |
|-------|------------|---------|------|
| 0.01  | Pumps      | B.Conc  | 20   |
| 30.00 | Pumps      | B.Conc  | 60   |
| 40.00 | Pumps      | B.Conc  | 70   |
| 43.00 | Pumps      | B.Conc  | 20   |
| 55.00 | Controller | Stop    |      |

Shimadzu LC-20 AD; System - FRA 02, Colon- Kromasil-100-5mk. C-18, 4,6x250 mm. N86915  
Elution: A - COOHNH4 0.2% pH 6,4; B - MeCN, fl - 1.0 ml/min, loop 20 mkl



**Figure S106.** Copy HPLC analysis of the derivative **17b**.

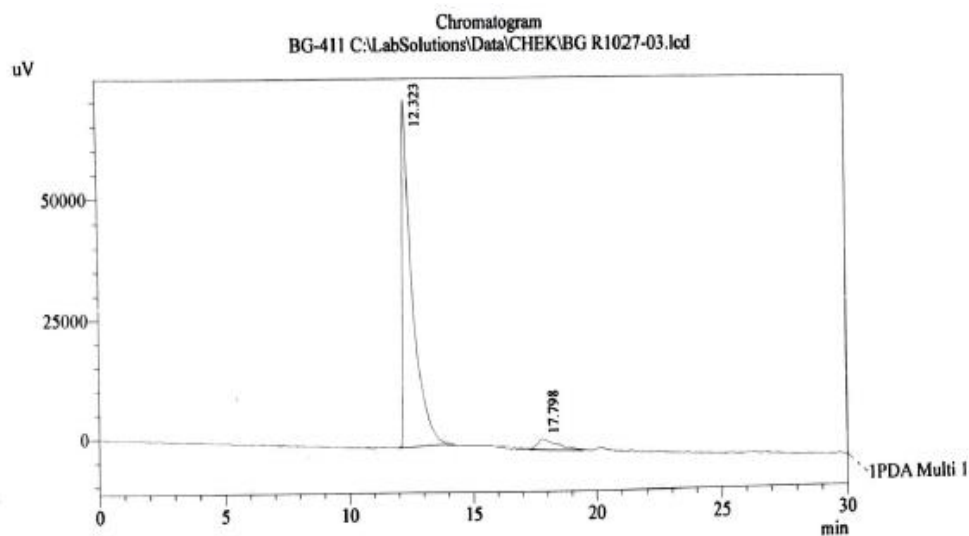

I PDA Multi I / 330nm 4nm

PDA Ch1 330nm 4nm

| Peak# | Ret. Time | Area    | Height | Area %  |
|-------|-----------|---------|--------|---------|
| 1     | 12.323    | 2023918 | 72419  | 94.401  |
| 2     | 17.798    | 120044  | 2294   | 5.599   |
| Total |           | 2143962 | 74713  | 100.000 |

Method Filename : FRA02BvApr.lcm 27.10.2021 12:16:40

| Time  | Unit       | Command | Value |
|-------|------------|---------|-------|
| 0.01  | Pumps      | B.Cone  | 20    |
| 30.00 | Pumps      | B.Cone  | 60    |
| 40.00 | Pumps      | B.Cone  | 70    |
| 43.00 | Pumps      | B.Cone  | 20    |
| 55.00 | Controller | Stop    |       |

Shimadzu LC-20 AD; System - FRA 02, Colon- Kromasil-100-5mkm. C-18, 4,6x250 mm. N86915  
Elution: A - COOHNH4 0.2% pH 6,4; B - MeCN, fl - 1.0 ml/min, loop 20 mkl

**Figure S107.** Copy HPLC analysis of the derivative **17c**.

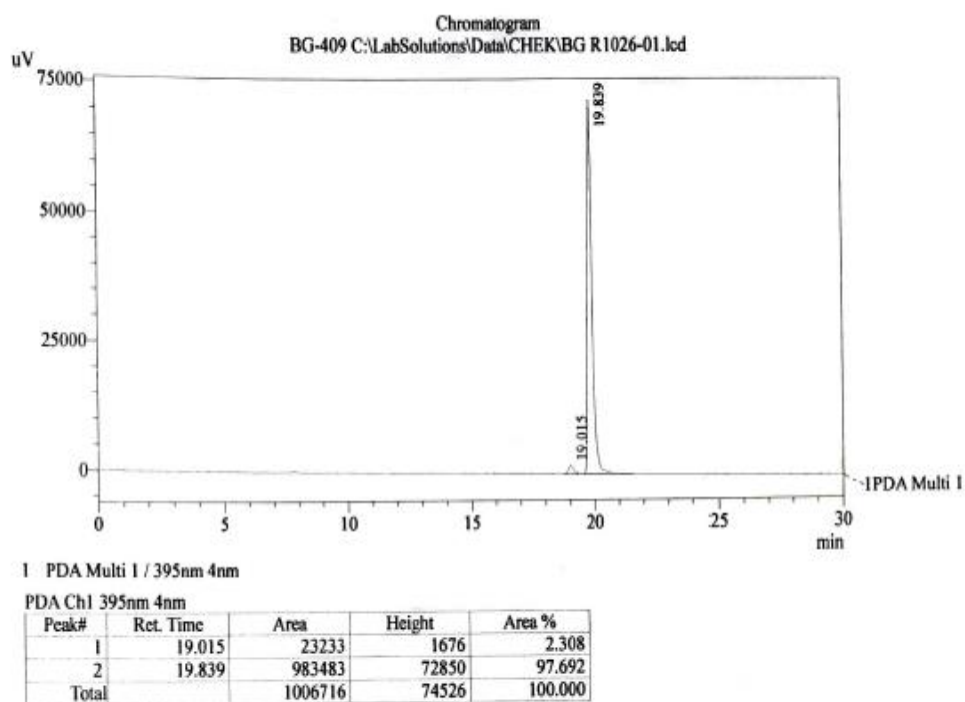

Method Filename : FRA02BvApr.lcm 26.10.2021 11:29:18

|       |            |         |      |
|-------|------------|---------|------|
| Time  | Unit       | Command | Valu |
| 0.01  | Pumps      | B.Conc  | 20   |
| 30.00 | Pumps      | B.Conc  | 60   |
| 33.00 | Pumps      | B.Conc  | 20   |
| 45.00 | Controller | Stop    |      |

Shimadzu LC-20 AD; System - FRA 02, Colon- Kromasil-100-5mk. C-18, 4,6x250 mm. N86915  
Elution: A - COOHNH4 0.2% pH 6,4; B - MeCN, fl - 1.0 ml/min, loop 20 mkl

**Figure S108.** Copy HPLC analysis of the derivative **17d**.

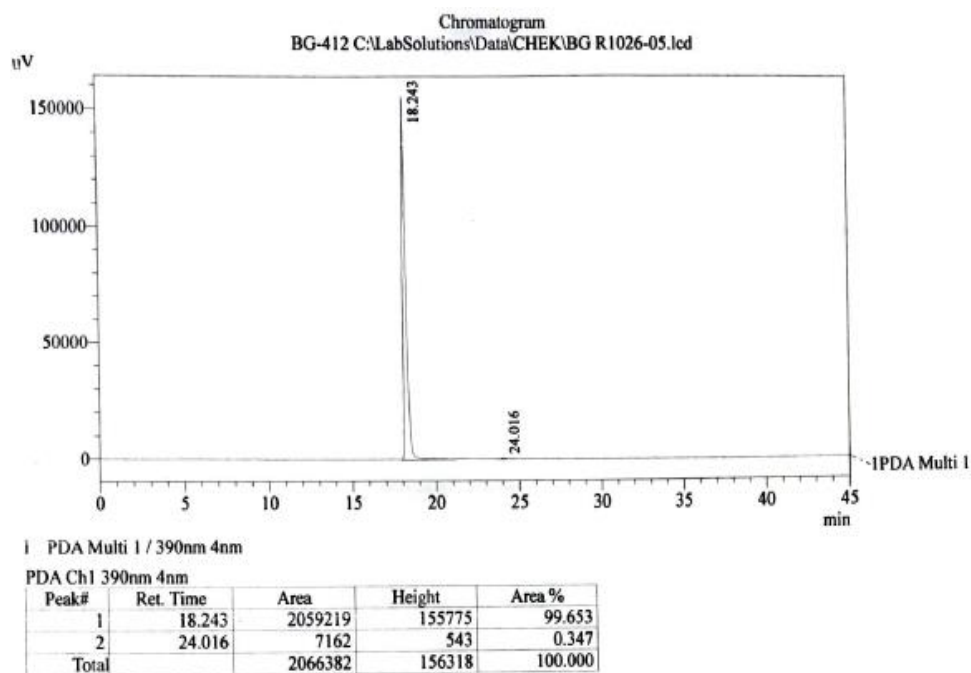

Method Filename : FRA02BvApr.lcm 26.10.2021 14:55:35

| Time  | Unit       | Command | Valu |
|-------|------------|---------|------|
| 0.01  | Pumps      | B.Conc  | 20   |
| 30.00 | Pumps      | B.Conc  | 60   |
| 40.00 | Pumps      | B.Conc  | 70   |
| 43.00 | Pumps      | B.Conc  | 20   |
| 55.00 | Controller | Stop    |      |

Shimadzu LC-20 AD; System - FRA 02, Colon- Kromasil-100-5mkm. C-18, 4,6x250 mm. N86915  
Elution: A - COOHNH4 0.2% pH 6,4; B - MeCN, fl - 1.0 ml/min, loop 20 mkl

**Figure S109.** Copy HPLC analysis of the derivative **18a**.

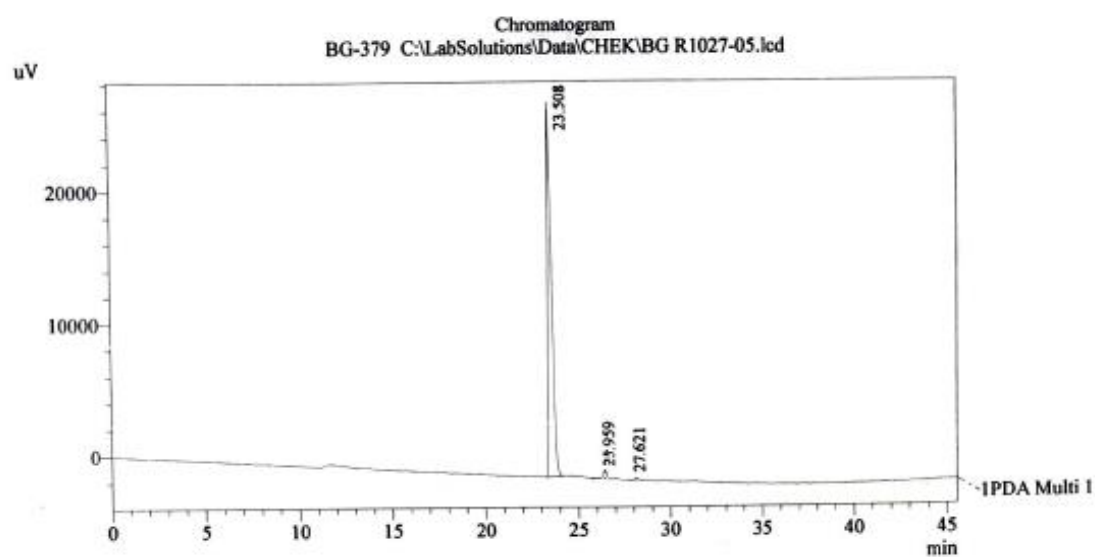

1 PDA Multi 1 / 470nm 4nm

PDA Ch1 470nm 4nm

| Peak# | Ret. Time | Area   | Height | Area %  |
|-------|-----------|--------|--------|---------|
| 1     | 23.508    | 432361 | 28232  | 97.780  |
| 2     | 25.959    | 6803   | 545    | 1.538   |
| 3     | 27.621    | 3016   | 230    | 0.682   |
| Total |           | 442179 | 29007  | 100.000 |

Method Filename : FOS Av1.lcm 27.10.2021 14:28:14

| Time  | Unit       | Command | Value |
|-------|------------|---------|-------|
| 0.01  | Pumps      | B.Conc  | 20    |
| 30.00 | Pumps      | B.Conc  | 60    |
| 40.00 | Pumps      | B.Conc  | 70    |
| 43.00 | Pumps      | B.Conc  | 20    |
| 55.00 | Controller | Stop    |       |

Shimadzu LC-20 AD; System - FRA 02, Colon- Kromasil-100-5mkm. C-18, 4,6x250 mm. N86915  
Elution: A - COOHNH4 0.2% pH 6.4; B - MeCN, fl - 1.0 ml/min, loop 20 mkl

**Figure S110.** Copy HPLC analysis of the derivative **18b**.

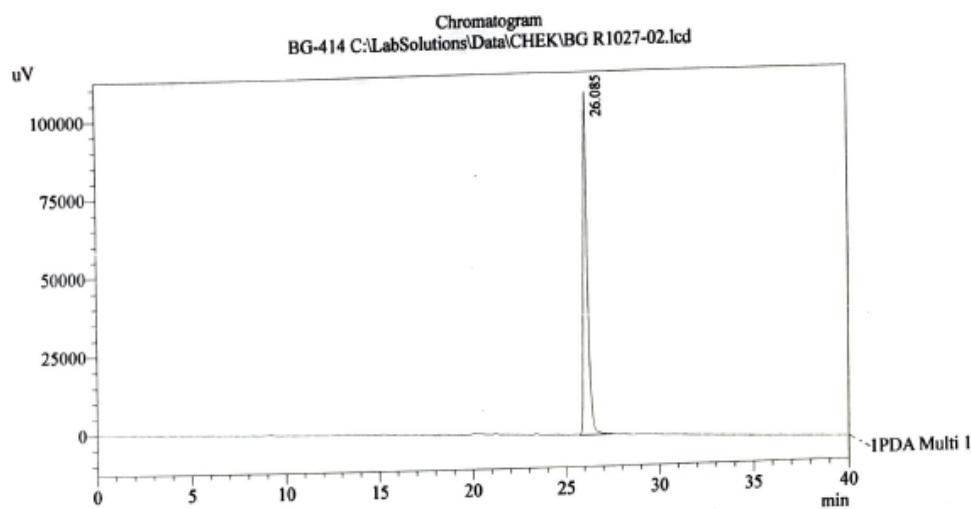

1 PDA Multi 1 / 393nm 4nm

PDA Ch1 393nm 4nm

| Peak# | Ret. Time | Area    | Height | Area %  |
|-------|-----------|---------|--------|---------|
| 1     | 26.085    | 1769536 | 108823 | 100.000 |
| Total |           | 1769536 | 108823 | 100.000 |

Method Filename : FRA02BvApr.lcm 27.10.2021 11:23:45

| Time  | Unit       | Command | Value |
|-------|------------|---------|-------|
| 0.01  | Pumps      | B.Conc  | 20    |
| 30.00 | Pumps      | B.Conc  | 60    |
| 40.00 | Pumps      | B.Conc  | 70    |
| 43.00 | Pumps      | B.Conc  | 20    |
| 55.00 | Controller | Stop    |       |

Shimadzu LC-20 AD; System - FRA 02, Colon- Kromasil-100-5mkm. C-18, 4,6x250 mm. N86915  
Elution: A - COOHNH4 0.2% pH 6.4; B - MeCN, fl - 1.0 ml/min, loop 20 mkl

**Figure S111.** Copy HPLC analysis of the derivative **18c**.

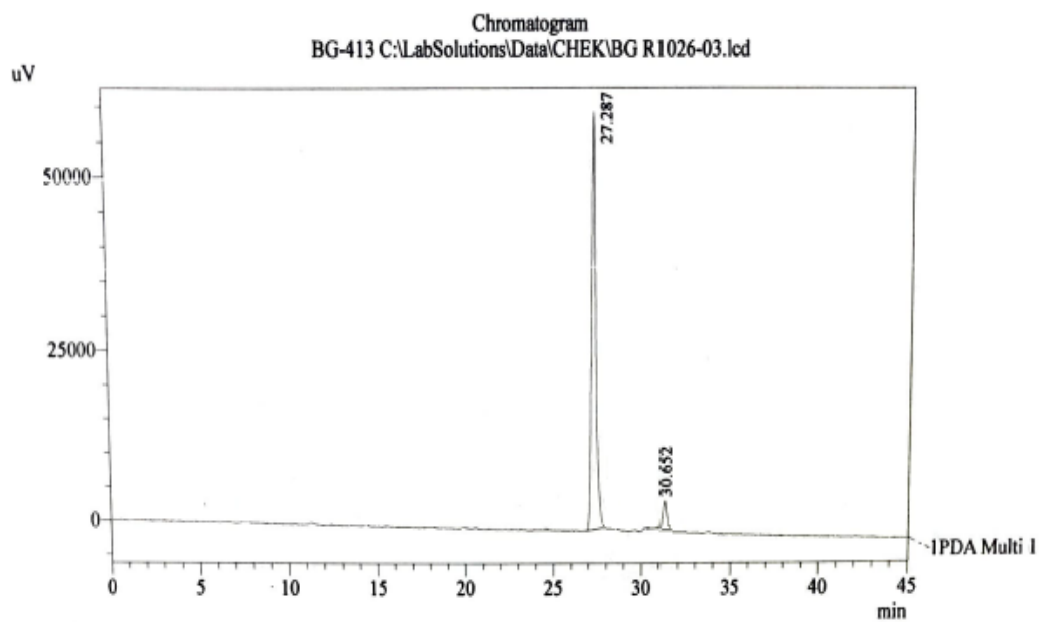

1 PDA Multi 1 / 395nm 4nm

PDA Ch1 395nm 4nm

| Peak# | Ret. Time | Area    | Height | Area %  |
|-------|-----------|---------|--------|---------|
| 1     | 27.287    | 1031612 | 60286  | 94.625  |
| 2     | 30.652    | 58602   | 3924   | 5.375   |
| Total |           | 1090214 | 64210  | 100.000 |

Method Filename : FRA02BvApr.lcm 26.10.2021 13:01:35

| Time  | Unit       | Command | Value |
|-------|------------|---------|-------|
| 0.01  | Pumps      | B.Conc  | 20    |
| 30.00 | Pumps      | B.Conc  | 60    |
| 40.00 | Pumps      | B.Conc  | 70    |
| 43.00 | Pumps      | B.Conc  | 20    |
| 55.00 | Controller | Stop    |       |

Shimadzu LC-20 AD; System - FRA 02, Colon- Kromasil-100-5mk. C-18, 4,6x250 mm. N86915  
Elution: A - COOHNH4 0.2% pH 6,4; B - MeCN, fl - 1.0 ml/min, loop 20 mkl

**Figure S112.** Copy HPLC analysis of the derivative **18d**.

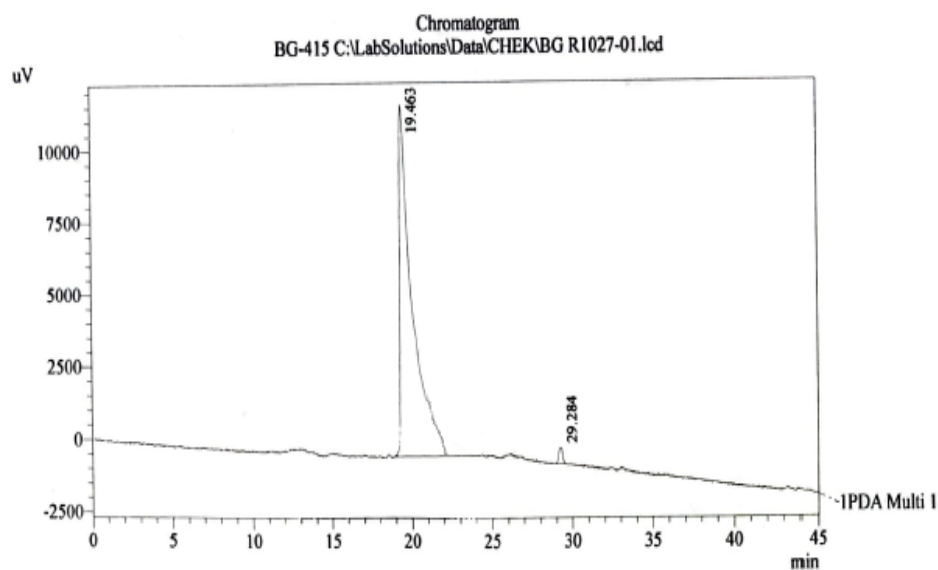

1 PDA Multi 1 / 440nm 4nm

PDA Ch1 440nm 4nm

| Peak# | Ret. Time | Area   | Height | Area %  |
|-------|-----------|--------|--------|---------|
| 1     | 19.463    | 740615 | 12108  | 98.758  |
| 2     | 29.284    | 9311   | 565    | 1.242   |
| Total |           | 749925 | 12673  | 100.000 |

Method Filename : FRA02BvApr.lcm 27.10.2021 10:27:49

| Time  | Unit       | Command | Value |
|-------|------------|---------|-------|
| 0.01  | Pumps      | B.Conc  | 20    |
| 30.00 | Pumps      | B.Conc  | 60    |
| 40.00 | Pumps      | B.Conc  | 70    |
| 43.00 | Pumps      | B.Conc  | 20    |
| 55.00 | Controller | Stop    |       |

Shimadzu LC-20 AD; System - FRA 02, Colon- Kromasil-100-5mk. C-18, 4,6x250 mm. N86915  
Elution: A - COOHNH4 0.2% pH 6,4; B - MeCN, fl - 1.0 ml/min, loop 20 ml

## The whole-genomic sequencing of *M. smegmatis* mutant MSMEG\_4883

>MSMEG\_4883

```
ATGAGCATATCGCTGCTGCTCGAGATGGCATCGTCGGGAGATCCCGACCGCACCGCGGTGGTTTCCGACG
ACACCCGGCTCACCGCAGGCGAGTTGAGCACATTGGCCGACGGGGCAGCAGGCGTCATCGCCGGGTCAGG
CGCGGCACACGTGCGCTACGTGGGTACCGGTGGCGCGCTGCTGCCGCTGCTGCTGTTTCGCTCGGCACGC
GCGGCGATCCCCTTCACCCCCTGAACTACCGTCTCAGCGCCGAAGGTCTGCGCGAGCTGGTCGACCGGT
TGCCACACCGCTGGTGATCGCCGACGGCGAGTACGCCGGCATGCTCGCCGGAGCGGGCAGGCCGGTGCT
CACCTCCGAGGAGTTCCTGTCCAGGCCCGCACGGCCGATCCGGCCGCAGAGTTCGCCGACCCCGACGCG
GTCGCGGTGGTGCTGTTACCTCGGGCACCACATCGCGCCCCAAGGCCGTGCGAACTCACCCACAACAACC
TCACGAGCTACATCACCGGGACCGTCGAATTCGTTTCGGCCGCACCGGAGGACGCCGCGCTGATCTGTGT
GCCGCCGTACCACATCGCGGGTGTGAGCGCGGCGATGTCAAACCTGTACGCCGGCCGGAAGATGGTGATAC
CTGCGCAACTTCGACGCACACCGCTGGGTGAGTTGGTGCGCACCGAGGGCGTCACGTCTGCCACCGTGG
TGCCGACCATGCTCGACCGTATCGTCACCGCACTTGAGACCACGCGCGCCGAGCTGCCGACCCTGCGCAA
CCTCGCTACGGCGGATCCAAGGTGCGGCTGCCCCCTGGTCCGCAAGGCGCTGGAGCTGATGCCGAACGTC
GGATTCGTCAACGCCTACGGTCTCACCGAAACCAGCTCCACCATCGCGGTCCTCGGACCCGACGACCACC
GGGCCGCGCTGGCCTCCGACGACCCCGGTGTGACCCGCCGCCTCGGGTCGGTGGGACAGGTGGTGCCCGG
GATCGAGGTGCAGATCCGCGGCGAGGACGGCACCGTGCTGGGGCCCGGCGAGACCGGTGAGCTGTTTCGTG
CGCGGCGAGCAGGTGTCCGGCCGGTACACCGAGATCGGGTCGGTGCTCGACGAGGACGGCTGGTTCCCCA
CCAAAGACGTTGCGATGCTTGACCAGGACGGCTATCTGTTTCATCGGCGGCCGGTCGGACGACACCATCAT
CCGCGGCGGCGAGAACATCGCTCCCGCCGAGATCGAGGACGTTCTCGTGGAACATCCCGACGTGCGCGAC
GTCGCGGTGGTCGGCCCCGAGGACCCCGAGTGGGGCCAGATCATCGTCGCGGTCTGGTGCCCGCCGACG
GCGCCGAACCCGACGCCGACGTACTCCGCGAGCACGTCCGCAACACCTGCGCGGATCCCGCACCCCGGA
CCGCGTGGTCTTCCGCGCCGAACTGCCACCAACGCCACCGGCAAGGTGCTGCGCCGTCAACTCGTCGAC
GAACTCCAGCCCATCTCGTAG
```

**Figure S113.** Nucleotide sequence of MSMEG\_4883. The 9 bp repeats are underlined, while the deletion region is highlighted as bold.



**Table S2.** Unique SNPs in quinoxaline-resistant *M. smegmatis* mutants.

| <i>M. smegmatis</i> <i>tfqR1</i> |             |                                                  |            |                            |                         |
|----------------------------------|-------------|--------------------------------------------------|------------|----------------------------|-------------------------|
| Locus tag                        | Protein ID  | annotation                                       | Codon      | SNP                        | amino acid substitution |
| MSMEG_0232                       | YP_884647.1 | sugar transporter family protein                 | codon=170  | TGG>GGG                    | W>G                     |
| MSMEG_1914                       | YP_886280.1 | RNA polymerase sigma-70 factor, family protein   | codon=30   | TTC>TGC                    | F>C                     |
| MSMEG_3954                       | YP_888243.1 | trehalose 6-phosphate phosphorylase              |            | 4024145 C->CG (frameshift) |                         |
| MSMEG_4043                       | YP_888329.1 | amidohydrolase                                   | codon=208  | TTC>CTC                    | F>L                     |
| MSMEG_4495                       | YP_888767.1 | hypothetical protein                             | codon=312  | CTG>CCG                    | L>P                     |
| MSMEG_5893                       | YP_890119.1 | hypothetical protein                             | codon=100  | GTG>GCG                    | V>A                     |
| <i>M. smegmatis</i> <i>tfqR2</i> |             |                                                  |            |                            |                         |
| Locus tag                        | Protein ID  | annotation                                       | Codon      | SNP                        | amino acid substitution |
| MSMEG_0341                       | YP_884754.1 | F420-dependent LLM class oxidoreductase*         | codon=308  | GTC>GCC                    | V>A                     |
| MSMEG_0341                       | YP_884754.1 | F420-dependent LLM class oxidoreductase*         | codon=229  | CGG>CTG                    | R>L                     |
| MSMEG_0342                       | YP_884755.1 | hypothetical protein                             | codon=221  | ATC>AAC                    | I>N                     |
| MSMEG_0363                       | YP_884776.1 | TetR family transcriptional regulator            | codon=181  | GAG>GAC                    | E>D                     |
| MSMEG_0933                       | YP_885336.1 | hypothetical protein                             |            | 1013795 A->AC (frameshift) |                         |
| MSMEG_1497                       | YP_885879.1 | acyl-CoA dehydrogenase                           | codon=330  | GAC>AAC                    | D>N                     |
| MSMEG_4272                       | YP_888549.1 | HesB/YadR/YfhF family protein                    | codon=94   | ACC>CCC                    | T>P                     |
| MSMEG_4323                       | YP_888598.1 | pyruvate dehydrogenase subunit E1                | codon=100  | CCC>TCC                    | P>S                     |
| MSMEG_4778                       | YP_889035.1 | thiolase                                         | codon=198  | ATG>ATC                    | M>I                     |
| MSMEG_5159                       | YP_889405.1 | DNA-binding response regulator                   | codon=40   | GCG>ACG                    | A>T                     |
| <i>M. smegmatis</i> <i>tfqR4</i> |             |                                                  |            |                            |                         |
| Locus tag                        | Protein ID  | annotation                                       | Codon      | SNP                        | amino acid substitution |
| MSMEG_2172                       | YP_886526.1 | dicarboxylate-carrier protein                    | codon=181  | TTC>GTC                    | F>V                     |
| MSMEG_3864                       | YP_888155.1 | cobaltochelatase subunit CobN                    | codon=1109 | TGG>TTG                    | W>L                     |
| MSMEG_3886                       | YP_888177.1 | twin arginine-targeting protein translocase TatC | codon=206  | CTG>CAG                    | L>Q                     |
| MSMEG_4702                       | YP_888963.1 | ABC transporter permease                         | codon=80   | GAA>GAC                    | E>D                     |
| MSMEG_4863                       | YP_889119.1 | LLM class flavin-dependent oxidoreductase*       | codon=224  | GCG>GGG                    | A>G                     |
| MSMEG_5943                       | YP_890168.1 | peroxisomal multifunctional enzyme type 2        | codon=106  | TCG>TAG                    | S>*                     |
| MSMEG_6294                       | YP_890512.1 | caib/baif family protein                         | codon=114  | CCG>CTG                    | P>L                     |
| MSMEG_6801                       | YP_891008.1 | kinase, pfkB family protein                      | codon=153  | CAC>CAG                    | H>Q                     |
| <i>M. smegmatis</i> <i>tfqR5</i> |             |                                                  |            |                            |                         |
| Locus tag                        | Protein ID  | annotation                                       | Codon      | SNP                        | amino acid substitution |
| MSMEG_4189                       | YP_888468.1 | cysteinyI-tRNA synthetase                        | codon=52   | CAT>AAT                    | H>N                     |
| MSMEG_6392                       | YP_890605.1 | polyketide synthase                              | codon=229  | GAT>GGT                    | D>G                     |
| <i>M. smegmatis</i> <i>tfqR6</i> |             |                                                  |            |                            |                         |
| Locus tag                        | Protein ID  | annotation                                       | Codon      | SNP                        | amino acid substitution |
| MSMEG_0889                       | YP_885292.1 | succinate-semialdehyde dehydrogenase             | codon=306  | AAG>GAG                    | K>E                     |
| MSMEG_1515                       | YP_885897.1 | two-component sensor histidine kinase            | codon=291  | GGG>AGG                    | G>R                     |
| MSMEG_1518                       | YP_885900.1 | hypothetical protein                             | codon=144  | TCC>TAC                    | S>Y                     |
| <i>M. smegmatis</i> <i>tfqR7</i> |             |                                                  |            |                            |                         |
| Locus tag                        | Protein ID  | annotation                                       | Codon      | SNP                        | amino acid substitution |
| MSMEG_0529                       | YP_884940.1 | serine/threonine protein kinase                  | codon=1013 | ATG>GTG                    | M>V                     |
| MSMEG_1380                       | YP_885766.1 | transcriptional regulator                        | codon=15   | GCG>TCG                    | A>S                     |
| MSMEG_6440                       | YP_890653.1 | monooxygenase, flavin-binding family protein     | codon=132  | TCG>TGG                    | S>W                     |
| All mutants                      |             |                                                  |            |                            |                         |
| Locus tag                        | Protein ID  | annotation                                       | Codon      | SNP                        | amino acid substitution |
| MSMEG_4883                       | YP_889139.1 | AMP-dependent synthetase/ligase                  |            | 4979295 GCGCTGCTGC->G      |                         |

\* Functionally annotated by BLAST search.
